# Supplementary material
Source: PubMed Central journal article supplement (PMC8482810)
Supplement: NEJMoa2113017_appendix.pdf [file NEJMoa2113017_appendix.pdf]

## Supplementary Appendix

This appendix has been provided by the authors to give readers additional information about their work.

Supplement to: El Sahly HM, Baden LR, Essink B, et al. Efficacy of the mRNA-1273 SARS-CoV-2 vaccine at completion of blinded phase. *N Engl J Med*. DOI: [10.1056/NEJMoa2113017](https://doi.org/10.1056/NEJMoa2113017)

## Supplement

### Table of Contents

| <b>Contents</b>                                                                                                                              | <b>Pg.</b> |
|----------------------------------------------------------------------------------------------------------------------------------------------|------------|
| COVE Study Group.....                                                                                                                        | 3          |
| List of COVE Study Trial Investigators and Team.....                                                                                         | 7          |
| Supplementary Methods.....                                                                                                                   | 18         |
| Fig. S1. Study Flow Diagram of Part A (Blinded Phase) Followed by Part B (Open-label Phase).....                                             | 21         |
| Fig. S2. Trial Profile during Blinded Part (A).....                                                                                          | 22         |
| Figure S3. Discontinuation from Study by Month (Randomization Set).....                                                                      | 23         |
| Figure S4. Solicited Injection-site and Systemic Adverse Events and Grades in Overall and Age Groups .....                                   | 24         |
| Figure S5. Covid-19 Starting after Randomization by Time Period in Per-protocol Set.....                                                     | 25         |
| Table S1. Criteria for Covid-19 Case Definition.....                                                                                         | 26         |
| Table S2. Grading of Covid-19 Symptoms .....                                                                                                 | 27         |
| Table S3. Description of Analysis populations .....                                                                                          | 28         |
| Table S4. Statistical Analysis Methods for Efficacy End points.....                                                                          | 29         |
| Table S5 Demographics and Characteristics of Population.....                                                                                 | 30         |
| Table S6. Solicited Adverse Events Overall and Age Groups by Grade, 1 <sup>st</sup> Injection, Solicited Safety Set.....                     | 34         |
| Table S7. Solicited Adverse Events Overall and Age Groups by Grade, 2 <sup>nd</sup> Injection, Solicited Safety Set.....                     | 36         |
| Table S8. Solicited Adverse Events by Sex, 1 <sup>st</sup> and 2 <sup>nd</sup> Injections, Solicited Safety Set.....                         | 38         |
| Table S9. Solicited Adverse Events by Severe Covid-19 Risk After 1 <sup>st</sup> and 2 <sup>nd</sup> Injections.....                         | 40         |
| Table S10. Number of Days Reporting Solicited Adverse Events After 1 <sup>st</sup> and 2 <sup>nd</sup> Injections, Solicited Safety Set..... | 42         |
| Table S11. Solicited Adverse Events by SARS-CoV-2 Baseline Status and grade, 1st Injection, Solicited Safety Set.....                        | 43         |
| Table S12. Solicited Adverse Events by SARS-CoV-2 Baseline Status and Grade, 2nd Injection, Solicited Safety Set .....                       | 45         |
| Table S13. Solicited Adverse Events with Onset after Day 8 or Beyond Post-Injection, Safety Set.....                                         | 47         |
| Table S14. Summary Unsolicited AEs Overall and Age Groups Up to 28 days After Any Injection, Safety Set.....                                 | 48         |

|                                                                                                                                                         |    |
|---------------------------------------------------------------------------------------------------------------------------------------------------------|----|
| Table S15. Summary of Unsolicited AEs Reported by $\geq 1\%$ of Participants in Any Treatment Group up to 28 Days After Any Injection, Safety Set ..... | 49 |
| Table S16. Unsolicited Severe AEs Reported by $>5$ Participants in Any Treatment Group up to 28 Days After Any Injection, Overall Safety Set .....      | 50 |
| Table S17. Summary Unsolicited AEs Up to 28 Days After Any Injection by SARS-CoV-2 Baseline Status .....                                                | 51 |
| Table S18. Summary of Unsolicited AEs by Severe Covid-19 Risk Up to 28 Days After Any Injection, Safety Set .....                                       | 52 |
| Table S19. Summary Unsolicited AEs Overall and Age Groups After Any Injection During Overall Study, Safety Set .....                                    | 53 |
| Table S20. Serious AEs Reported by Preferred Term in Any Treatment Group, Overall Safety Set .....                                                      | 54 |
| Table S21. Serious and Severe Treatment-related AEs in Overall and Age Groups Safety Set.....                                                           | 61 |
| Table S22. Unsolicited Adverse Events of Hypersensitivity, Overall Safety Set.....                                                                      | 63 |
| Table S23. Incidence of Dermal Filler Reaction Post-Vaccination by Preferred Term by Age Group, Safety Set.....                                         | 64 |
| Table S24. Bell's Palsy in Overall Safety Set and By Age Group.....                                                                                     | 65 |
| Table S25. Thromboembolic Events in the Overall Safety Set and by Age Group.....                                                                        | 66 |
| Table S26. Death summary in Blinded Phase.....                                                                                                          | 67 |
| Table S27. Vaccine Efficacy for Primary and All Secondary Endpoints.....                                                                                | 68 |
| Table S28. Covid Case Summary Per-Protocol and mITT Definitions*.....                                                                                   | 69 |
| Table S29. Vaccine Efficacy to Prevent Covid-19* in Subgroups Assessed.....                                                                             | 70 |
| Table S30. Cases of Covid-19 and SARS-COV-2 Infection Post-randomization by Time Periods, Per-Protocol Set.....                                         | 72 |
| Table S31. Covid-19 Symptoms and Severity in Adjudicated Covid-19 and Severe Covid-19 Cases, Per-protocol Set .....                                     | 73 |
| Table S32. Baseline Characteristics of Participants with Covid-19* Based on Adjudicated Cases, Per-protocol Set.....                                    | 74 |
| Table S33. Exploratory Analysis in Participants with One Injection 14 days First Injection, mITT.....                                                   | 76 |

**COVE Study Group (pubmed listed, and ordered alphabetically by institution affiliation)**

| <b>Affiliation/Funding*</b>                                                                                      | <b>Study Group</b>                                                                                                                                                                                     | <b>Location</b>    |
|------------------------------------------------------------------------------------------------------------------|--------------------------------------------------------------------------------------------------------------------------------------------------------------------------------------------------------|--------------------|
| AB Clinical Trials                                                                                               | Atoya Adams, MD, MBA, Eric Miller                                                                                                                                                                      | Las Vegas, NV      |
| Accel Research Sites                                                                                             | Bruce G. Rankin DO, John Hill MD, Steven Shinn MD, Marshall Nash MD                                                                                                                                    | DeLand, FL         |
| Advanced Clinical Research                                                                                       | Sinikka L. Green MD, Colleen Jacobsen, Jayasree Krishnankutty, Sikhongi Phungwayo                                                                                                                      | Cedar Park, TX     |
| Alliance for Multispecialty Research                                                                             | Richard M. Glover, II MD, Drs. Stacy Slechta, Troy Holdeman, Robyn Hartvickson, Amber Grant                                                                                                            | Newton, KS         |
| Alliance for Multispecialty Research                                                                             | Terry L. Poling MD, Terry D. Klein MD, Thomas C. Klein MD, Tracy R. Klein MD                                                                                                                           | Wichita, KS        |
| Alliance for Multispecialty Research                                                                             | William B. Smith MD, Richard L. Gibson MD, Jennifer Winbigler MD, Elizabeth Parker PA                                                                                                                  | Knoxville, TN      |
| Baptist Health Center for Clinical Research                                                                      | Priyantha N. Wijewardane, MD, Eric Bravo MD, Jeffrey Thessing MD, Michelle Maxwell APRN, Amanda Horn APRN                                                                                              | Little Rock, AR    |
| Baylor College of Medicine, NIAID 1UM1AI148575-01S2                                                              | Hana El Sahly MD, Jennifer Whitaker MD, Catherine Mary Healy MD, Christine Akamine MD                                                                                                                  | Houston, TX        |
| Benchmark Research                                                                                               | Laurence Chu, MD, R. Michelle Chouteau, MD                                                                                                                                                             | Austin, TX         |
| Benchmark Research                                                                                               | Michael J. Cotugno MD, George H. Bauer, Jr. MD                                                                                                                                                         | Metairie, LA       |
| Benchmark Research                                                                                               | Greg Hachigian MD, Masaru Oshita MD, Michael Cancilla NP, Deborah Murray NP, Kristen Kiersey NP                                                                                                        | Sacramento, CA     |
| Benchmark Research                                                                                               | William Seger MD, Mohammed Antwi, Allison Green, Anthony Kim                                                                                                                                           | Fort Worth, TX     |
| Brigham and Women's Hospital, NIAID UM1AI069412, NCATS UL1RR025758                                               | Lindsey R Baden MD, Michael Desjardins MD, Jennifer A Johnson MD, Amy Sherman MD, Stephen R Walsh MD                                                                                                   | Boston, MA         |
| Carolina Institute for Clinical Research                                                                         | Judith Borger DO, Ryan Starr DO, Scott Syndergaard DO, Nafisa Saleem MD                                                                                                                                | Fayetteville, NC   |
| Centex Studies                                                                                                   | Joel Solis MD, Martha Carmen Medina PA-C, Westly Keating PA-C, Edgar Garcia PA-C, Cynthia Bueno PA-C                                                                                                   | McAllen, TX        |
| Clinical Research Atlanta                                                                                        | Nathan Segall MD, Nathan Segall, Jon Finley, Mildred Stull                                                                                                                                             | Stockbridge, GA    |
| Clinical Trials of Texas                                                                                         | Douglas Scott Denham DO, Thomas Weiss MD, Ayoade Aworo DNP, Parke Hedges MD                                                                                                                            | San Antonio, TX    |
| Coastal Carolina Research Center                                                                                 | Cynthia Becher Strout MD, Rica Santiago, Yvonne Davis, Patty Howenstine, Alison Bondell                                                                                                                | Mount Pleasant, SC |
| Cornell Clinical Trials Unit - Weill Cornell Uptown & Weill Cornell Chelsea, NIAID UM1AI068619, NCAT UL1TR002384 | Kristin Marks MS MD, Grant Ellsworth, MS, MD, Tina Wang, MD, Timothy Wilkin, MD, MPH, Mary Vogler, MD, Carrie Johnston, MD, MS                                                                         | New York, NY       |
| Covid19 Prevention Network (CoVPN, NIAID-NIH)                                                                    | Michele P Andrasik, Jessica G Andriesen, Gail Broder, Lawrence Corey, Niles Eaton, Kathleen M Neuzil, Huub G Gelderblom, James G Kublin, Rachael McClennen, Nelson Michael, Merlin Robb, Carrie Sopher | Seattle, WA        |
| DM Clinical Research                                                                                             | Vicki E. Miller MD, MPH, Fredric Santiago MD, Blanca Gomez FNP-C, Insiya Valika PA-C, Amy Starr FNP-C                                                                                                  | Tomball, TX        |
| Emory University – Ponce de Leon Clinical Research Site, NIAID 3UM1AI068614-14S1                                 | Colleen Kelley MD MPH, Valeria D Cantos MD, Sheetal Kandiah MD MPH, Carlos del Rio MD                                                                                                                  | Atlanta, GA        |
| Emory University – Hope Clinic, NIAID 1UM1AI148576-01                                                            | Nadine Roupael MD, Paulina Rebolledo, Sripatha Edupuganti, Daniel Sans Graciaa                                                                                                                         | Decatur, GA        |
| Emory University School of Medicine, NIAID 1UM1AI148576-01                                                       | Evan J Anderson MD, Andres Camacho-Gonzalez MD, Satoshi Kamidani MD, Christiana A Rostad MD, Meghan Teherani MD                                                                                        | Atlanta, GA        |
| George Washington University, NIAID UM1AI068619                                                                  | David Joseph Diemert MD, Elissa Malkin, Marc Siegel, Afsoon Roberts, Gary Simon                                                                                                                        | Washington, DC     |
| Hackensack University Medical Center                                                                             | Bindu Balani MD, Carolene Stephenson, Steven Sperber, Cristina Cicogna                                                                                                                                 | Hackensack, NJ     |
| Henry Ford Health System                                                                                         | Marcus J. Zervos MD, Paul Kilgore MD, MPH, Mayur Ramesh MD, Erica Herc MD, Kate Zenlea MPH                                                                                                             | Detroit, MI        |
| Hope Research Institute                                                                                          | Abram Burgher MD, Ann Marie Milliken                                                                                                                                                                   | Phoenix, AZ        |
| Hope Research Institute                                                                                          | Joseph D. Davis MD, Brendan Levy, Sandra Kelman                                                                                                                                                        | Chandler, AZ       |
| Hope Research Institute                                                                                          | Matthew W. Doust MD, Denise Sample, Sandra Erickson                                                                                                                                                    | Phoenix, AZ        |

| Affiliation/Funding*                                                          | Study Group                                                                                                            | Location             |
|-------------------------------------------------------------------------------|------------------------------------------------------------------------------------------------------------------------|----------------------|
| J. Lewis Research                                                             | Shane Glade Christensen MD, Christopher Matich, James Longe, John Witbeck                                              | Salt Lake City, UT   |
| J. Lewis Research                                                             | James Todd Peterson MD, Alexander Clark, Gerald Kelty, Issac Pena-Renteria                                             | Salt Lake City, UT   |
| Jacksonville Center for Clinical Research                                     | Michael J. Koren MD, Darlene Bartilucci MD, Jeffery Jacqmeim MD, Alpa Patel MD, Carolyn Tran MD                        | Jacksonville, FL     |
| Javara                                                                        | Christina Kennelly MD, Robert Brownlee, Jacob Coleman, Hala Webster                                                    | Charlotte, NC        |
| Johnson County Clin-Trials                                                    | Carlos A. Fierro MD, Natalia Leistner, Amy Thompson, Celia Gonzalez                                                    | Lenexa, KS           |
| Kaiser Permanente Washington Health Research Institute, NIAID 1UM1A1148373-01 | Lisa A Jackson MD MPH, Janice Suyehira MD                                                                              | Seattle, WA          |
| Laguna Clinical Research Associates                                           | Milton Haber MD, Maria M. Regalado MD, Veronica Procasky RN JD, Alisha Lutat                                           | Laredo, TX           |
| Lynn Health Science Institute                                                 | Carl P. Griffin MD, Raymond Cornelison, William Schnitz, Shanda Gower                                                  | Oklahoma City, OK    |
| Lynn Institute of the Rockies                                                 | Ripley R. Hollister MD, Jeremy Brown DO, Melody Ronk PA-C                                                              | Colorado Springs, CO |
| M3 Wake Research                                                              | Wayne Lee Harper MD, Lisa Cohen DO, Lynn Eckert PA-C, Matthew Hong MD                                                  | Raleigh, NC          |
| MediSync Clinical Research Hattiesburg Clinic                                 | Rambod Rouhbakhsh MD, MBA, Elizabeth Danford MD, John Johnson MD, Richard Calderone MD                                 | Petal, MS            |
| Meridian Clinical Research                                                    | Shishir Kumar Khetan MD, Oyebisi Olanrewaju AC-CRNP, Nan Zhai NP-C, Kimberly Nieves AC-CRNP, Allison O'Brien AC-CRNP   | Rockville, MD        |
| Meridian Clinical Research                                                    | Paul Simon Bradley MD, Amanda Lilienthal MSN NP-C, Jim Callis PA-C                                                     | Savannah, GA         |
| Meridian Clinical Research                                                    | Adam Benson Brosz MD, Andrea Clement PA, Whitney West APRN, Luke Friesen PA, Paul Cramer APRN                          | Grand Island, NE     |
| Meridian Clinical Research                                                    | Frank Steven Eder MD, Ryan Little FNP, Victoria Engler FNP, John Tarbox FNP, Heather Rattenbury-Shaw DO                | Binghamton, NY       |
| Meridian Clinical Research                                                    | David Jon Ensz MD, Tavane Harrison, Allie Oplinger                                                                     | Dakota Dunes, SD     |
| Meridian Clinical Research                                                    | Brandon James Essink MD, Jay Meyer MD, Frederick Raiser, III MD, Kimberly Mueller APRN, Roni Gray PA                   | Omaha, NE            |
| Meridian Clinical Research                                                    | Keith William Vrbicky MD, Charles Harper MD, Chelsie Nutsch MD, Wendell Lewis III MD, Cathy Laflan MD                  | Norfolk, NE          |
| Meridian Clinical Research                                                    | Jordan L. Whatley MD, Nicole Harrell MD, Amie Shannon MD, Crystal Rowell APRN, FNP-C, Christopher Dedon APRN, FNP-C    | Baton Rouge, LA      |
| NIH                                                                           | Mamodikoe Makhene MD MPH                                                                                               | Bethesda, MD         |
| New Horizons Clinical Research                                                | Gregory Mark Gottschlich MD, Kate Harden PA-C, Melissa Gottschlich PA-C, Mary Smith MSN, FNP-C, Richard Powell MD      | Cincinnati, OH       |
| Optimal Research                                                              | Murray A. Kimmel DO, Simmy Pinto MD                                                                                    | Melbourne, FL        |
| Optimal Research                                                              | Timothy P. Vachris MD, Mark Hutchens MD, Stephen Daniels DO, Margaret Wells MD                                         | Austin, TX           |
| Optimal Research                                                              | Mimi Van Der Leden MD, PhD, Peta Gay Jackson Booth MD                                                                  | Rockville, MD        |
| Palm Beach Research Center                                                    | Mira Baron MD, Pamela Kane DO, Shannen Seversen PA-C, Mara Kryvicky PA-C, Julia Lord PA-C                              | West Palm Beach, FL  |
| Paradigm Clinical Research Center                                             | Jamshid Saleh MD, Matthew Miles, Rafael Lupercio                                                                       | Redding, CA          |
| Quality of Life Medical & Research Centers                                    | John W. McGettigan Jr. MD, Walter Patton MD, Riemke Brakema MD, Karin Choquette MSN, ABNP-C, Jonlyn McGettigan MSN, RN | Tucson, AZ           |
| Rancho Paseo Medical Group                                                    | Judith L. Kirstein MD, Marcia Bernard NP                                                                               | Banning, CA          |
| Rapid Medical Research                                                        | Mary Beth Manning MD, Joan Rothenberg MD, Toby Briskin MD, Denise Roadman PAC, Sharita Tedder-Edwards FNP              | Cleveland, OH        |
| Research Centers of America                                                   | Howard I. Schwartz MD, Surisday Mederos, Barbara Corral, Jennifer Schwartz, Nelia Sanchez-Crespo                       | Hollywood, FL        |
| Rutgers New Jersey Medical School, NIAID UM1A1068619                          | Shobha Swaminathan MD, Amesika Nyaku MD MS, Tilly Varughese MD, Michelle DallaPiazza MD                                | Newark, NJ           |
| Saint Louis University, NIAID 1UM1A1148685-01                                 | Sharon E Frey MD, Irene Graham MD, Getahun Abate MD PhD MSc, Daniel Hoft MD PhD                                        | St. Louis, MO        |
| St. Vincent's Health System                                                   | Leland N. Allen III MD, Leslie Anne Edwards MSN, CRNP, William Simpson Davis Jr., MS PA-C, Jessica Maria Mena, PA      | Birmingham, AL       |

| Affiliation/Funding*                                                      | Study Group                                                                                                   | Location         |
|---------------------------------------------------------------------------|---------------------------------------------------------------------------------------------------------------|------------------|
| Suncoast Research Group                                                   | Mark E. Kutner MD, Jorge Caso MD, CPI, Maria Hernandez Moran APRN, Marianela Carvajal APRN, Janet Mendez APRN | Miami, FL        |
| Sundance Clinical Research                                                | Larkin T. Wadsworth III MD, Horacio Marafioti, Lyly Dang, Jennifer Berry, Lauren Clement                      | St. Louis, MO    |
| Synexus Clinical Research                                                 | Michael Ryan Adams MD, Leslie Iverson PA                                                                      | Murray, UT       |
| Synexus Clinical Research                                                 | Joseph Lee Newberg MD, Laura Pearlman MS, MD, MBA                                                             | Chicago, IL      |
| Synexus Clinical Research                                                 | Paul Joseph Nugent DO, Leonard Singer                                                                         | Cincinnati, OH   |
| Synexus Clinical Research                                                 | Michele Diane Reynolds MD, Jennifer Bashour MD, Robert Schmidt MD                                             | Dallas, TX       |
| Synexus Clinical Research                                                 | Neil Parmanand Sheth MD, Kenneth Steil DO                                                                     | Glendale, AZ     |
| Synexus Clinical Research                                                 | Ramy Joseph Toma MD, William Kirby MD, Pink Folmar MD, Samantha Williams NP                                   | Birmingham, AL   |
| Synexus Clinical Research                                                 | Judith White MD, Robert Meyer MD, Sejal Patel MD, Prity Patel APRN                                            | Orlando, FL      |
| Tekton Research                                                           | Paul Pickrell MD, Stefanie Mott FNP-C, Carol Ann Linebarger MD, Hussain Malbari MD, David Pampe MD            | Austin, TX       |
| Texas Center for Drug Development                                         | Veronica G. Fragoso MD, Lisa Holloway MD, Cecilia McKeown-Bragas MD, Teresa Becker MD, Vicki Miller MD        | Houston, TX      |
| Trial Management Associates                                               | Barton G. Williams MD, William H. Jones MD                                                                    | Wilmington, NC   |
| VA Greater Los Angeles Healthcare System                                  | Michael Lewis MD, Elham Ghadishah, Joseph Yusin, Mai Pham                                                     | Los Angeles, CA  |
| University of California Los Angeles, NIAID UM1AI068619                   | Jesse L Clark MD, Steven Shoptaw PhD, Michele Vertucci PA, NP, Will Hernandez NP                              | Los Angeles, CA  |
| University of California San Diego, NIAID UM1AI068636                     | Stephen A. Spector MD, Amaran Moodley MD, Jill Blumenthal MD, Lisa Stangl NP, Karen Deutsch NP                | La Jolla, CA     |
| University of Chicago                                                     | Kathleen M. Mullane DO PharmD, David Pitrak MD, Cheryl Nuss FNP, Judy Pi PharmD                               | Chicago, IL      |
| University of Cincinnati, NIAID UN1AI068619                               | Carl Fichtenbaum MD, Margaret Powers-Fletcher PhD, Michelle Saemann RN, Sharon Kohrs RN                       | Cincinnati, OH   |
| University of Colorado Denver, Anschutz Medical Campus, NIAID UM1AI068636 | Thomas B. Campbell MD, Andrew Lauria, Jose Castillo Mancilla, Hillary Dunlevy                                 | Aurora, CO       |
| University of Illinois at Chicago – Project WISH, NIAID UM1AI068619       | Richard M Novak MD, Andrea Wendrow, Scott Borgetti, Ben Ladner                                                | Chicago, IL      |
| University of Maryland School of Medicine, NIAID 1UM1AI148689-01          | Karen L Kotloff MD, Matthew Laurens, Milagritos Tapia, Lisa Chrisley, Cheryl Young                            | Baltimore, MD    |
| University of Miami, NIAID 3UM1AI068614-14S1                              | Susanne Doblecki-Lewis MD, Maria Luisa Alcaide, Jose Gonzales-Zamora, Stephen Morris                          | Miami, FL        |
| University of North Carolina at Chapel Hill, NIAID UM1AI068619            | Cynthia Gay MD MPH, David Wohl MD, Joseph Eron, Jr. MD                                                        | Chapel Hill, NC  |
| University of Pennsylvania, NIAID 3UM1AI068614-14S1                       | Ian Frank MD, Debora Dunbar, David Metzger, Florence Momplaisir                                               | Philadelphia, PA |
| University of Pittsburgh Medical Center, NIAID 1UM1AI148452-01            | Judith Martin MD, Alejandro Hoberman MD, Timothy Shope MD MPH, Gysella Muniz MD                               | Pittsburgh, PA   |
| University of Texas Medical Branch, NIAID 1UM1AI148575-01                 | Richard Rupp MD, Amber Stanford PA-C, Megan Berman MD, Laura Porterfield MD                                   | Galveston, TX    |
| VA Greater Los Angeles Healthcare System                                  | Michael Lewis MD, Elham Ghadishah, Joseph Yusin, Mai Pham                                                     | Los Angeles, CA  |
| Vanderbilt University Medical Center, NIAID 1UM1AI148452-01               | Clarence Buddy Creech II MD, Shannon Walker MD, Stephanie Rolsma MD PhD, Robert Samuels, Isaac Thomsen MD     | Nashville, TN    |
| Vanderbilt University Medical Center, NIAID 3UM1AI068614-14S1             | Spyros Andrews Kalams MD, Greg Wilson MD                                                                      | Nashville, TN    |
| Velocity Clinical Research                                                | Gregg H. Lucksinger MD, Kevin Parks MD, Ryan Israelsen MD, Jaleh Ostovar FNP-C, Kary Kelly FNP-C              | Medford, OR      |
| Velocity Clinical Research, San Diego                                     | Jeffrey Scott Overcash MD, Hanh Chu, Kia Lee, Karla Zepeda                                                    | La Mesa, CA      |
| VitaLink Research                                                         | Luis I. De La Cruz MD, Steve Clemons, Elizabeth Everette, Suzanna Studdard                                    | Greenville, SC   |
| VitaLink Research                                                         | Gowdhami Mohan MD, Stefanie Tyson, Alyssa-Kay Peay, Danyel Johnson                                            | Anderson, SC     |

| Affiliation/Funding*                    | Study Group                                                                                              | Location          |
|-----------------------------------------|----------------------------------------------------------------------------------------------------------|-------------------|
| VitaLink Research-Spartanburg           | Gregory J. Feldman MD, May-Yin Suen, Jacqueline Muenzner, Joseph Boscia, Farhan Siddiqui                 | Spartanburg, SC   |
| Wake Forest University Health Sciences  | John Sanders MD, PhD, James Peacock MD, Julio Nasim MD                                                   | Winston Salem, NC |
| WR-Clinical Research Center of Nevada   | Michael L. Levin MD, Julie Hussey MSN APRN FNP-C, Marcy Kulic MD                                         | Las Vegas, NV     |
| WR-ClinSearch                           | Mark Montgomery McKenzie MD, Teresa Deese, Erica Osmundsen, Christy Sweet                                | Chattanooga, TN   |
| WR-Global Medical Research              | Valentine Mbepson Ebu MD MA MSc, Elwaleed Elnagar MD, Georgette Ebu DNP APRN FNP-C, Genevieve Iwuala FNP | Dallas, TX        |
| WR-Medical Center for Clinical Research | Laurie J. Han-Conrad MD, Todd Simmons MD, Denis Tarakjian MD                                             | San Diego, CA     |

\*Funding of institutions by the National Institute of Allergy and Infectious Diseases (NIAID) and/or research support by the National Center for Advancing Translational Science (NCATS) as indicated. All other institutions were funded by Office of the Assistant Secretary for Preparedness and Response, Biomedical Advanced Research and Development Authority. The content of this publication is solely the responsibility of the authors and does not necessarily represent the official views of the funding sources.

## List of COVE Trial Investigators and Study Teams

| Principal Investigator  | Study Team                                                                                                                                                                                                                                                                                                                                                                                                                                                                                                                                                                                                                                                                                                                                                                                                                                                                                                                                                                                                                                                                                                                                                                                                                                                                                                                                                                                                                                                                                                                                                                                                                                     | Institution                              | Location            |
|-------------------------|------------------------------------------------------------------------------------------------------------------------------------------------------------------------------------------------------------------------------------------------------------------------------------------------------------------------------------------------------------------------------------------------------------------------------------------------------------------------------------------------------------------------------------------------------------------------------------------------------------------------------------------------------------------------------------------------------------------------------------------------------------------------------------------------------------------------------------------------------------------------------------------------------------------------------------------------------------------------------------------------------------------------------------------------------------------------------------------------------------------------------------------------------------------------------------------------------------------------------------------------------------------------------------------------------------------------------------------------------------------------------------------------------------------------------------------------------------------------------------------------------------------------------------------------------------------------------------------------------------------------------------------------|------------------------------------------|---------------------|
| Atoya Adams, MD, MBA    | Miriah Campbell, Eric Miller, Daisy Langarica, Alia Bober, Diana Giraldo                                                                                                                                                                                                                                                                                                                                                                                                                                                                                                                                                                                                                                                                                                                                                                                                                                                                                                                                                                                                                                                                                                                                                                                                                                                                                                                                                                                                                                                                                                                                                                       | AB Clinical Trials                       | Las Vegas, NV       |
| Michael Ryan Adams, MD  | Leslie Iverson, Andryelle Toledo, Melinda Bullington, Alicia Hanten, Carolyn Taylor, Shannon Wright, Chase Carnahan, Rachel Law, Natalie Smith, Julie Taylor, Jared-Robert Blake, Stefanie Vasconez, Courtney Jensen                                                                                                                                                                                                                                                                                                                                                                                                                                                                                                                                                                                                                                                                                                                                                                                                                                                                                                                                                                                                                                                                                                                                                                                                                                                                                                                                                                                                                           | Synexus Clinical Research                | Murray, UT          |
| Leland N. Allen III, MD | Leslie Anne Edwards, William Simpson Davis, Jr., Ronald Meza, Jordan Stauffer, John Farringer, Faith Holmes, Rhonda Buzbee, Cristina Velez, Huse Lisa, Lisa Huse, Camelia Speegle, Gregory Prestage, Mary Perez, Jessica Space, Matthew Todd, Jessica McDowell, Marha Bunnell-Pollak, Jackie Ziegler, Jasmine Ali, Dumitru Sirbu, Kellie Williams, Logan Sawyer, Richelle Chambliss, Samantha Blackmon, Stephanie Brennan, Tiffany Gibbs, Alexandria Anderson, Caitlin Roll, Candace Robinson, Zachary McCoy, Jessica Bartlett, Kimberly Cornelison, Chris Bovell, Vincent Baglini, Christy Greenhalgh, Jessica Maria Mena, David House, Matt Honold, Esteban Zurita                                                                                                                                                                                                                                                                                                                                                                                                                                                                                                                                                                                                                                                                                                                                                                                                                                                                                                                                                                           | St. Vincent's Health System              | Birmingham, AL      |
| Evan J. Anderson, MD    | Kathleen Stephens, Francine Dyer, Maya Stagg, Aaliyah Carron, Austin Lu, Julia Barton, Sy Tran, Leisa Bower, Esther Park, Jianguo Xu, Rebecca Gonzalez, Vy Ngo, Mike Shepard, Lezly Roxxette Zepeda, Karen Sytsma, Sandra Rojas-Honan, Felicia Glover, Susan Rogers, Theda Gibson, Christina A. Rostad, Andres Camacho-Cornalez, Teresa Ball, Satoshi Kamidani, Mehgan Farah Teherani, Vikash Patel, Etza Peters, Peggy Kettle, Lisa Macoy, Cindy Lubbers, Amber Samuel, Laila Hussaini, Kathryn Zaks, Caroline Ciric, Meg Taylor, Oliver Smith, Amy Muchinsky, Sydney Biccum, Laura Clegg, Dean Kleinhenz, Angelle Ijeoma, Hannah Huston                                                                                                                                                                                                                                                                                                                                                                                                                                                                                                                                                                                                                                                                                                                                                                                                                                                                                                                                                                                                      | Emory University School of Medicine      | Atlanta, GA         |
| Lindsey Baden, MD       | Xhoi Mitre, Jon Gothing, Bruce Bausk, Jessica Cauley, Natalie Izaguirre, Lewis Novack, Michael Seaman, Katherine Yanosick, Henry Rutherford, Junghyun Kim, Dominique Betterbed, Kathleen Garvey, Lauren Clore, Alexander Mills, Deepesh Duwadi, Alessandra Setaro, Kyl Bowman, Kevin McManus, Sidali Beriane, Fadi Ghantous, Christy Lavine, Jasper Ophel, Joseph Sapiente, Jessica Doring, Tessa Speidel, Lauren Garneau, Robert Dannemiller, Kirquenie Rolle, Mulika Chhorn, Bailey McCarthy, Hana Flaxman, Milenko Tanasijevic, Cameron Nutt, Javier Barria, Andre Avila-Paz, Buteau Malhaika, Tong Alexandra, Tenaizus Woods, Bethany Evans, Hannah Jin, LaKeisha Gandy, Stephanie St. Pierre, Carolyn Darcy, Michael Corrado, James Maguire, Adetoun Okenla, Tamara Roldon Sevilla, David Kubiak, Cassandre Titus, Movita Harrigan, Maria Alvarado, Rose Theodat, Amy Sherman, Laura Platt, Kirsten Goodman, Laura Nicholson, Wilfredo Matias, Emily Koleske, Ruth Rodriguez, Nicole Taikeff, Jun Bai Park Chang, Julia Klopfer, Phoebe Cunningham, Elizabeth Sampson, Karen Magsipoc, Maureen Macgowan, Lauren Donahue, Haley Schram, Noah Abasciano, Megan Powell, Janet Morgan, Yazed Alsowaida, Olivia Riccardi, Neha Limaye, Virginia Loudermilk, Austin Kim, Kevin Zinchuk, Caitlin Grant, Charles Kelly, David Mellace, Jamie Myers, Erika Gribb, Jose Licon, Monica Feeley, Stephen R Walsh, Jennifer A Johnson, Ann Woolley, Alexis Liakos, Jane Kleinjan, Jon Gothing, Nicolas Issa, Michael Desjardins, Raphael Dolin, Alka Patel, Opeyemi Talabi, Christine Price, Paulette Chandler, Elizabeth W Karlson, Allison P Moriarty | Brigham and Women's Hospital             | Boston, MA          |
| Bindu Balani, MD        | Smith Kerowyn, Sergio Garcia, Charo Valdez, Shelly Chin, Caitlin DiBello, Silvia Lara, Chika Ekweghariri, Abena Roberts, Abimbola Coker, Marie-Therese Estantouli, Greg Eskinazi, Michael Tortoriello, Jay Elkareh, Meral Karakoc, Olga Spathis, Patrice Hassoun, Carolene Stephenson, Steven Sperber, Kaur Harveen, Cristina Cicogna, Ciaran Mannion                                                                                                                                                                                                                                                                                                                                                                                                                                                                                                                                                                                                                                                                                                                                                                                                                                                                                                                                                                                                                                                                                                                                                                                                                                                                                          | Hackensack University Medical Center     | Hackensack, NJ      |
| Mira Baron, MD          | Pamela Kane, Maria Bermudez, Shannen Seversen, Mara Kryvicky, Julia Lord, Terri Barr, Daisy Acevedo, Elena Acosta, Delta Anderson, Alexandra Arango, Anne Bauer, Joshua Egbehor, Tim Flanary, Audrey Haber, Carol Henao, Patti Isaacson, Peter Jacob, Sakaiya Jackson, Karen Kodes, Ludovic La-Branche, Kimarie Lee-Russell, Carol Liso, Cristina Liso, Stephanie Morse, Michelle Navarrette, Christy Norcross, Nora Norcross, Annette Pitts, Mary Sergalis, David Scott, Tytiana Spearman, Danielle Theodore, Brian Thomas, Jennifer Torres                                                                                                                                                                                                                                                                                                                                                                                                                                                                                                                                                                                                                                                                                                                                                                                                                                                                                                                                                                                                                                                                                                   | Palm Beach Research Center               | West Palm Beach, FL |
| Judith Borger, DO       | Jennifer Angell, Nicole Austin, Deanna Benz, Lucian Cappoli, Nicole Davis, Lynn Eckert, Kathryn Hostetter, Stephanie Keating, Jeanette Mangual-Coughlin, Avia McClain-Stocker, Ifeanyi Momodu, Cheryl Norris, Brennan Opanasenko, Stacey Saldau, Nafisa Saleem, Amy Sheets, Ryan Starr, Scott Syndergaard, Jennifer Thomas, Michelle Wallace, Jeffery Pemberton, Mitchell Arildsen, Dan Tomita                                                                                                                                                                                                                                                                                                                                                                                                                                                                                                                                                                                                                                                                                                                                                                                                                                                                                                                                                                                                                                                                                                                                                                                                                                                 | Carolina Institute for Clinical Research | Fayetteville, NC    |
| Paul Simon Bradley, MD  | Taja Adams, Stephanie Ailey, Kira Bell, Shanice Bennett, Vincent Bernades, Jim Callis, Bounphone Chanthavong, Taryn Collett, Anne Crouch, Shannon Davis, Morgan Deal, Mimi Duncan, Brandon Essink, Laura Falcone, Debra Gabrielson, Brooke Halpern, Anyfa Hanna, Cassie Heisey, Dawn Kalloniatis, Andrew Kimball, Jeanette Lee, Amanda Lilienthal, Ginny McNew, Crystal Neely, Kay Lynn Olmsted,                                                                                                                                                                                                                                                                                                                                                                                                                                                                                                                                                                                                                                                                                                                                                                                                                                                                                                                                                                                                                                                                                                                                                                                                                                               | Meridian Clinical Research               | Savannah, GA        |



| Principal Investigator       | Study Team                                                                                                                                                                                                                                                                                                                                                                                                                                                                                                                                                                                                                                                                                                                                                                                          | Institution                                            | Location           |
|------------------------------|-----------------------------------------------------------------------------------------------------------------------------------------------------------------------------------------------------------------------------------------------------------------------------------------------------------------------------------------------------------------------------------------------------------------------------------------------------------------------------------------------------------------------------------------------------------------------------------------------------------------------------------------------------------------------------------------------------------------------------------------------------------------------------------------------------|--------------------------------------------------------|--------------------|
|                              | Nicole Osborn, Chevon Roberts, Pechoka Sanders, Cynthia Seedorf, Kathryn Stoddard, Jonathan Whelan, Stella Yoon                                                                                                                                                                                                                                                                                                                                                                                                                                                                                                                                                                                                                                                                                     |                                                        |                    |
| Adam Benson Brosz, MD        | Rhonda Richter, Debra Gabrielson, Kayla Flege, Ashley Bell, Karen Jo Johnson, Paul Cramer, Jessica Stanton, Andrea Clement, Whitney West, Laura Falcone, Amanda Friesz, Kathy Osborne, Summer Tophoj, Kimber Breeden, Susan Newman, Douglas Herbek, Lindsey Mettenbrink, Luke Friesen, Alison Pierce                                                                                                                                                                                                                                                                                                                                                                                                                                                                                                | Meridian Clinical Research                             | Grand Island, NE   |
| Abram Burgher, MD            | Stephanie Catanzaro, Shauna Harrell, Magen Hess, Nate Alderson, Bettie D'Nise Corcoran, Norma Frederick, Adrian Alejo, Brian DeCraene, Karen Wakefield, Scarlett Hammett, Susan DeCraene, Ann Marie Milliken, Neil Pearson, Donald Terral Harper                                                                                                                                                                                                                                                                                                                                                                                                                                                                                                                                                    | Hope Research Institute                                | Phoenix, AZ        |
| Thomas B. Campbell, MD       | Andrew Lauria, Jenelynn Kimble, Steven Johnson, Matin Krsak, Andrew Monte, Patrisha Adkins, Michelle Barron, Suzanne Fiorillo, Amy Harrison, Anderson Victoria, Nga Le, Sara Berech, Jose Castillo-Mancilla, Kristine Erlandson, Laurel Ware, Josie Marshall, Stephen Bartlett, Hillary Dunlevy                                                                                                                                                                                                                                                                                                                                                                                                                                                                                                     | University of Colorado Denver, Anschutz Medical Campus | Aurora, CO         |
| Shane Glade Christensen, MD  | Christopher Mickelson, Jessica Shaw, Emily Raming, Amy Nelson, Gabrielle Lewis, Jenessa Folsom, Mikaela Jones, Dylan Owen, Rachel Pugmire, Jennifer Bradley, Annjanette Kemp, Krista Marti, Allyson Christensen, Madison Ellis, Holly Anderson, Emily Bloomquist, Ross Brunetti, Thomas Conner, Jr., Gina Cox, Diana Grazulis, Wesley Lewis, James Longe, Christopher Match, Bryan Nelson, Sarah Scott, John Witbeck, Stephen Wood                                                                                                                                                                                                                                                                                                                                                                  | J. Lewis Research                                      | Salt Lake City, UT |
| Laurence Chu, MD             | Jennifer Bacchi, Maria Barrientes, Lamar Box, Christian Casas, R. Michelle Chouteau, Katherine Davis, Tandra Dora, Cindy Duran, Pamela Fidler, Ruth Fitch, Brooke Harris, Isaiah Knight, Jennifer Leyva, Michelle Listz, Jennifer Montes, Javier Perez, Jessica Ruff, Dean Skiles, Sean Turnbow, Francesca Vigil, Breana Wade, Kelly Weber                                                                                                                                                                                                                                                                                                                                                                                                                                                          | Benchmark Research                                     | Austin, TX         |
| Jesse L. Clark, MD           | Sandy MacNicol, Somaieh Talebi, Timothy Hall, Steven Shoptaw, Emery Chang, Michael Li, David Goodman, Paul Adamson, Oladunni Adeyiga, Inez Bentancourt, Susan Reed, Christopher Blades, Jasmin Tavares, Demetria Villanueva, Simone Riley, Jonathan Veloz, Schuyler Thomas, Will Hernandez, Jennifer Baughman, Mitchell Stern, Michele Vertucci                                                                                                                                                                                                                                                                                                                                                                                                                                                     | University of California, Los Angeles                  | Los Angeles, CA    |
| Michael J. Cotugno, MD       | Kyra Lawson, Kim Harper, Edwin Adamson, George H. Bauer Jr., Julie Bilich, Brenda Lawson, Brandon Illickal, Lois Eaglin, Heather Salisbury, Jeff Segner                                                                                                                                                                                                                                                                                                                                                                                                                                                                                                                                                                                                                                             | Benchmark Research                                     | Metairie, LA       |
| Clarence Buddy Creech II, MD | Shanda Phillips, Naomi Kown, Katherine Sokolow, Wendy Winn, Katherine Wright, Shannon Walker, Stephanie Rolsma, Anna Gallion, April Hanlotxomphou, Deborah Myers, Robert Adkisson, Natalia Jimenez, Cindy Trimmer, Roberta Winfrey, Matthew Donio, John Oleis, Donna Torr, Shelly McGehee, Robert Samuels, Sandra Yoder, Eric Brady, Isaac Thomsen, Madeleine Guy, Emma Alexander, Lana Howard, Krisha Alexander, Shane Moore, Tacora Wright, Tara Evans, Ursula Powell, Jenna Caserta, Valerie Mitchell, Meryk Moore, Melissa Lehman, Diane Anders, Constance Dotye, Crystal Rice, Lamar Bowman, Sherri Hails, Monique Bennett, Nicki Soper, Leigh Howard                                                                                                                                          | Vanderbilt University Medical Center                   | Nashville, TN      |
| Joseph D. Davis, MD          | Sandra Kelman, Sandra Braden, Sabrina Bolland, Mia Munoz, Jose Barocio, Brendan Levy, Dhvani Shah, Neil Pearson, Stephanie Catanzaro, Nathan Alderson, Susan DeCraene, Maureen Godfrey, Skyla Clark                                                                                                                                                                                                                                                                                                                                                                                                                                                                                                                                                                                                 | Hope Research Institute                                | Chandler, AZ       |
| Luis I. De La Cruz, MD       | Amy Ford, Taylor Wilson, Cindy Smith, Austin Lambert, Erin Zeiler, Kaelyn Rowland, Marlee Smith, Suzanna Studdard, Zandra Hamilton, Meredith Benfield, Sara Poff, David Godwin, Elizabeth Everette, Steven Clemons, Kayla Peay, Stephanie Gilreath                                                                                                                                                                                                                                                                                                                                                                                                                                                                                                                                                  | Vitalink Research                                      | Greenville, SC     |
| Douglas Scott Denham, DO     | Thomas Weiss, Parke Hedges, Ayoade Aworo, Kay Scroggins, Leisel Koerber, Antonio Gutierrez, Nathan Cortez, Andrea Gomez, Darlington Akahara, Michelle Smith, Kristy Trevino, Beatriz Herrera, Shaiane Dickerson, Kerry de Jesus, Matthew Korte, Cynthia Ramos, Reanna Martinez, Erica Leal, Shakeria Flores, Paul Esparza, Brian Hemming, Melinda Axton, D'Andre White, Terri Perez, Carolina Coronado, Rebecca Many, Clayton Stone, Kimberly Evans, Anshuman Maharaj, Stephen Brick, Steffanie Barrera, Staci Poettgen, Dawn Killian, Gerardo Pena, Karol Perez, Victoria Hernandez, Kevin Martinez, Amy Griffith, Nolan Payton, Quincey Hogue, Jamie Padilla, Emily Mendez, Lily Hays, Maristelle Co, Nicholas Trinidad, Ismael Rodriguez, Amy Lewis, Cindi Nellis, Lele Simmons, Marissa Johnson | Clinical Trials of Texas                               | San Antonio, TX    |
| David Joseph Diemert, MD     | Linda Witkin, Aimee Desrosiers, DeEnna Wedding, Bertran Walton, LaKeisha Queen, Ryan Mouton, Caroline Thoreson, Manya Magnus, Jennifer Wald, Erika Faust, Nicholas Heredia, Robbie Kattappuram, Hira Qadir, Chelsea Ware, Hannah Yellin, Kegan Dasher, Daniel Mullen, Jeanne Jordan, Taylor Ladson, Madison Lintner, Kaitlyn Macnair, Bitana Saintilma, Kelly Thomas, Samantha Walker, Neha Rampally, Madhu Balachandran, Elissa Malkin, David Parenti, Hana Akselrod, Marc Siegel, Gary Simon, Afsoon Roberts, Aileen Chang                                                                                                                                                                                                                                                                        | George Washington University                           | Washington, DC     |

| Principal Investigator     | Study Team                                                                                                                                                                                                                                                                                                                                                                                                                                                                                                                                                                                                                                                                                                                                                                                                                                                    | Institution                             | Location         |
|----------------------------|---------------------------------------------------------------------------------------------------------------------------------------------------------------------------------------------------------------------------------------------------------------------------------------------------------------------------------------------------------------------------------------------------------------------------------------------------------------------------------------------------------------------------------------------------------------------------------------------------------------------------------------------------------------------------------------------------------------------------------------------------------------------------------------------------------------------------------------------------------------|-----------------------------------------|------------------|
| Susanne Doblecki-Lewis, MD | Maria Luisa Alcaide, Jose Gonzalez-Zamora, Stephen Morris, Yimy Puerto, Annie Salvarrey, Claudia Balgas, Claudia Santos, Katherine King, Brahian Steven Erazo, Mayra Fernandez, Leopoldo Cordova-Garcia, Elisa Corzo-Sanchez, Edgar Fernandez, Loreta Padron, Stefani Ann Butts, Kenia Moreno, Juan Casuso, Maria de Pilar Valanzasca, Thomas Tanner, Marilyn Fernandez, Mary Aloise, Inza Patton, Vivian Pastrana, Sindy Puerto, Irma Barreto Ojeda, Junlin Long, Barbara Huang, Gilianne Narcisse, Vanessa Perez                                                                                                                                                                                                                                                                                                                                            | University of Miami                     | Miami, FL        |
| Matthew W. Doust, MD       | Denise Sample, Sandra Erickson, Nate Alderson, Adrian Alejo, Stephanie Catanzaro, Susan DeCraene, Cassie Enricco, Sandra Erickson, Alex Guereque, Shauna Harrell, Shana Harshell, Stephanie Junker, Stephanie Laufenberg, Madison Mikulak, Makayla Morra, Nicole Olson, Neil Pearson, Jasmin Redden, Monique Romo, Denise Sample, Dhwani Shah, Sahara Vega, Emma Kar                                                                                                                                                                                                                                                                                                                                                                                                                                                                                          | Hope Research Institute                 | Phoenix, AZ      |
| Valentine Mbepson Ejuh, MD | Elwaleed Elnagar, Georgette Ejuh, Genevieve Iwuala, Catina Adams, Marissa Cervenka, Ezgar Del Real, Shraddha Dubal, Elwaleed Elnagar, Jenifer Fiate, Kathy Harell, Genevieve Iwuala, Vicki Martinez, Robert Miranda, Brennan Opanasenko, Destiny Robinson, Liz Ruiz, Amy Sheets, Shoniece Wallace                                                                                                                                                                                                                                                                                                                                                                                                                                                                                                                                                             | WR-Global Medical Research              | Dallas, TX       |
| Frank Steven Eder, MD      | Ryan Little, Victoria Engler, John Tarbox, Heather Rattenbury-Shaw, Deborah Hubish, Jessie Taylor, Debra Gabrielson, Jessica Fellows, Jennifer Molstead, Kathe Olmstead, Ashley Conover, Tammy Kohn, Chelsea Briar, Corrine Young, Colleen McVannan, Kelli Quick, Shaylyne Hubanks, Kimber Breeden, Ann Marie Sampson, Traci Hull, Tarin Gordon, Susan Owen, Kate Macarak, Tonya Rackett, Jacob Blattstein, Partidge Jane Aton, Nicole Croft, Carolyn Grausgruber, Rebecca Miller, Ryan Little, Victoria Engler, John Tarbox, Heather Rattenbury-Shaw, Nathan Kimball, Courtney Heisey, Ginny McNew, Abigail Wine, Cindi VanKuren, Jared Frick, Tammy Dennis, Andrew Kimball                                                                                                                                                                                  | Meridian Clinical Research              | Binghamton, NY   |
| Hana M. El Sahly, MD       | Jennifer A. Whitaker, C. Mary Healy, Christine Akamine, Wendy A Keitel, Robert L Atmar, Annette Nagel, Sandra Francisco, Thea Marie Cordero, Janet Brown, Jennifer Christensen, Caroline Doughty-Skierski, Connie Rangel, Carrie Kibler, Coni Cheesman, Lisreina Toro, Chanei Henry, Chianti Wade Bowers, Pedro Piedra, Kathy Bosworth, Kayla Burrell, Jesus Banay, Tykel Eddy, Trent Davis, Shetel Anassi, Yvette Rugeley, Olga Rybina-Willis                                                                                                                                                                                                                                                                                                                                                                                                                | Baylor College of Medicine              | Houston, TX      |
| David Jon Ensz, MD         | Pamela Allen, Taylor Bergh, Kimber Breeden, Avery Dunn, Brandon Essink, Debra Gabrielson, Rylea Gulick, Tavane Harrison, Courtney Heisey, Andrew Kimball, Shelby Klaschen, Jessica Knight, Makayla Langston, Meagan Miller, Allie Oplinger, Heather Persinger, Alison Pierce, Kathryn Stoddard, Kayla Sturgeon, Jamie Thompson, Melissa Wiseman                                                                                                                                                                                                                                                                                                                                                                                                                                                                                                               | Meridian Clinical Research              | Dakota Dunes, SD |
| Brandon James Essink, MD   | Jay Meyer, Frederick Raiser, Kimberly Mueller, Roni Gray, Riley Brockman, Tabitha Campbell, Carrie Essink, Laura Falcone, Roni Gray, Linda Layton, Jay Meyer, Kimberly Mueller, Tiffany Nemecek, Frederick "Fritz" Raiser, III, Jessica Satorie, Chelsea Steinmetz, Nicole Osborn, Cassie Heisey, Maria Nguyen                                                                                                                                                                                                                                                                                                                                                                                                                                                                                                                                                | Meridian Clinical Research              | Omaha, NE        |
| Gregory J. Feldman, MD     | May-Yin Suen, Brittany Cooksey, Madison Fowler, Sarah Chynoweth, Gary Clemons, Laura Jolly, Charlie Jordan, Heather Allison, Steve Clemons, Amber Brittany Belcher, Allison Kelly, Marsha Gossett, Wendy Taylor, Amy Witt, Kendal Nelson, Jeffrey Witt, Jacqueline Muenzner, Elizabeth Everette, Supinder Channa, Allison Ayers, Joseph Boscia, Farhan Siddiqui                                                                                                                                                                                                                                                                                                                                                                                                                                                                                               | VitaLink Research-Spartanburg           | Spartanburg, SC  |
| Carl J. Fichtenbaum, MD    | Maggie Powers-Fletcher, Michelle Saemann, Sharon Kohrs, Kimberly Mullins, Lindsay Davis, Moises Huaman, Angela Snyder, Kristin Weghorn, Brenda Miller, Elizabeth Costea, Lisa Schira, Romana Saeed, Helen Shelton, Kathleen Ballman, Laura Browning-Cho, Sherry Donaworth, Chris Goddard, Jeanine Goodin, Elizabeth Niederegger, Lisa Hachey, Tamara Maus, Pam Fletcher, Makayla Bishop, Victoria Straughn, Shaina Horner, Carrie Christofield, Dana Burns, Jason Mayes, Kelly Windholtz, Lisa Proffitt, Faizan Qureshi, Michelle O'Neil, Arustamyan Lisa, Sarah Trentman, Eva Whitehead, Jennifer Baer, Linda Hinds, Jaasiel Chapman, D'Vaughn House, Gary Frazier, Judy Houston, Lisa Altenau, Mary Burns, Dorice Smith, Justin Ragle, Eric Mueller, Cynthia Nypaver, Jaime Robertson, Anissa Moussa, Geronimo Feria Garzon, Sierra Bennett, Marlana Petrie | University of Cincinnati                | Cincinnati, OH   |
| Carlos A. Fierro, MD       | Mazen Zari, Celia Gonzalez, Natalia Leistner, Mary Easley, Mary Provost, Krista Estrada, Ann Geier, Amy Thompson, Heather Barker, Karol Moore, Kelly Moen, Monica Atwood, Amber Wolf, Brandi Dickerson, Manyohn Rinehart, Dina Hammine, Angela Eichler, Casey Johnson, Nathan Arthur                                                                                                                                                                                                                                                                                                                                                                                                                                                                                                                                                                          | Johnson County Clin-Trials              | Lenexa, KS       |
| Veronica G. Fragoso, MD    | Lisa Holloway, Cecilia McKeown-Bragas, Teresa Becker, Vicki Miller, Leena Mir, Elton Oliveira, Moez Talpur, Enya Rentas-Sherman, Gabriela Maria Becerra, Dewayne Hicks, Robert Krbashyan, Shakira Barr, Ashraf Jafri, Herman Ortiz, Zohair Harianawala, Chandra Tobin, Norma Gonzalez, Saji Perinjilil, Khorshid Amirhosravi, Tracy Kowalski, Biman Goswami, Waheeda Sureshbabu, Amy Anderson, Berenice                                                                                                                                                                                                                                                                                                                                                                                                                                                       | Texas Center for Drug Development, Inc. | Houston, TX      |

| Principal Investigator       | Study Team                                                                                                                                                                                                                                                                                                                                                                                                                                                                                                                                                                                                                                                                                                                                                                                                                                                                                                                                                                                                                                                                                                                                                                                                                               | Institution                                 | Location          |
|------------------------------|------------------------------------------------------------------------------------------------------------------------------------------------------------------------------------------------------------------------------------------------------------------------------------------------------------------------------------------------------------------------------------------------------------------------------------------------------------------------------------------------------------------------------------------------------------------------------------------------------------------------------------------------------------------------------------------------------------------------------------------------------------------------------------------------------------------------------------------------------------------------------------------------------------------------------------------------------------------------------------------------------------------------------------------------------------------------------------------------------------------------------------------------------------------------------------------------------------------------------------------|---------------------------------------------|-------------------|
|                              | Ferrero, Simeen Khan, Chen-Ho Yang, Nazanin Zarinkamar, Scott Ward, Crystal Reese, Miyosha Lewis, Olga Konshina, Lorrian Yates, Joel Cano, Quiana Wilson, Kara Sikes, Diana Chehab, Joanna Quezan, Maryam Rabbani, Sadaf Batla, Abbyssinia Moges, Diego Carrington, Matthew Joseph, Laura Grissanty, Dean Jang, Dustin McFadden, Misbah Baloch, Elisa Moralez, Abdeali Dalal, Frances Saubon, William Fernandez, Jenny Toress, Blessing Felix, Zain Rizvi                                                                                                                                                                                                                                                                                                                                                                                                                                                                                                                                                                                                                                                                                                                                                                                |                                             |                   |
| Ian Frank, MD                | Annet Davis, Eileen Donaghy, Nicole Sundo, Juan Ramirez, Laura Schankel, Dana Brown, Katharine Bar, Dana Brown, Christopher Chianese, Gillain Constantino, Dovie Watson, Kathleen Degnan, Helen Koenig, William Short, Petra Alexander, Eileen Mergliano, Jie Ho, Michele Wisniewski, Debora Dunbar, Liani Santini-Lopez, Rosemarie Kappes, Angela Cabassa, Tammy Chen, Berry SotoVega, Deborah Kim, Devon Cliett, Kate Kearns, Jillian Baron, Vivian Leung, Florence Momplaisir, Sarah Wood, Tameka Matthews, David Metzger, Richard Tustin                                                                                                                                                                                                                                                                                                                                                                                                                                                                                                                                                                                                                                                                                             | University of Pennsylvania                  | Philadelphia, PA  |
| Sharon E. Frey, MD           | Irene Graham, Getahun Abate, Daniel Hoft, Heather Douds, Cassandra Zehenny, Joan Siegner, Helay Hassas, Kim Cooper, Shirley Dettlebach, Sabrina DiPiazza, Carol Duane, Linda Eggemeyer-Sharpe, Lauren Foreman, Jerry Hutter, Ryan Kerr, Kate Liefer, Tracy Montauk, Karla Mosby, Janice Tennant, Nicole Purcell, Kiana Wilder, Kathleen Chirco, Sharon Irby-Moore, Kathleen Koehler, Melissa Loyet, Thomas Pacatte, Susan Stewart, Azra Blazevic, Tamara Blevins, Chase Colbert, Christopher Eickhoff, Lainey Mejia Jauregui, Keith Meyer, Krystal Meza, Amanda Nethington, Huan Ning, Brittany Williams, Mei Xia, Yinyi Yu, Stanley Dublin, Mary Pat Eastman, Eric Eggemeyer, Mikayla Frye, Michelle Harris, Aleshia McCoy, Donna Duncan, Gwendolyn Tatum, Nicole Purcell, Kiana Wilder, Tammy Grant, Claudia Castillo Paredes, Rong Hou, Jin Wang, Qian Wang, Sarah George                                                                                                                                                                                                                                                                                                                                                             | Saint Louis University                      | St. Louis, MO     |
| Cynthia Gay, MD              | David Wohl, Joseph Eron, Jr., Andrew Thorne, Michelle Floris-Moore, Christopher Hurt, David Wohl, Chidinma Okafor, Janette Goins, Ulrike Adam, Ekundayo Nylander-Thompson, Anna Furlong, XinHong Ao, Kathy Guerrero, Melinda Hart, Kathleen Loeven, Rachael Mossey, Esther Speight, Rachel White, Chloe Twomey, Kristen Gray, Miriam Chicurel-Bayard, Susanne Henderson, Patti Vasquez, April Welch, Camille O'Reilly, Maureen Furlong, Noshima Darden-Tabb, Elizabeth DuBose, Marie Oriol, Dynesha Perry, Maria Stetson, Maria Bullis, Shelby Turner, Ebony Harrington, Michael Herce, Suzanne Blevins, Alexander Bradley, Susan Pedersen, Becky Straub, Sandra Barnhart, Felicia Barriga Munante, Nazneen Howerton, Tevnan Keller, Mandy Tipton, Abigail Riddick, Kristi Kirkland, Maggie Harman, Tania Hossain, Centhia Washington, Erin Hoffman, Carolina Pastrana Medina, William Johnson, Samantha Earnhardt, Amy James Loftis, Catherine Kronk, Yaa Ofori-Marfoh, Julie A Nelson, Nicole Maponga, Lina Rosengren-Hovee, William Zhao, Jennifer Thompson, Sarah Law, Holly Milner, Jonathan Oakes, Rachel Cook, Erin Cardot, Oesa Vinesett, Victoria Rucinski, Joy Wannamaker, Tanaily Giralt Smith, Eliza DuBose, Chidinma Okafor | University of North Carolina at Chapel Hill | Chapel Hill, NC   |
| Richard M. Glover, II, MD    | Stacy Slechta, Troy Holdeman, Robyn Hartvickson, Amber Grant, Jennifer Bennett, Lindsey Brewer, Janelle Brown, Kelsey Burden, Melissa Burton, Brianna Burton, Jordan Danby, Sheri Duncan, Amber Grant, Robyn Hartvickson, Lisa Hemmelgarn, Sherry Henning, Jeri King, Riley King, Colton King, April Kitterman, Shannen Lassiter, Cayla Lawless, Janna Martinez, Ragene Moore, Marissa Mueller, Aaron Nguyen, Justin Phillips, Jordan Reheis, Rebecca Ring, Katherine Saengerhausen, Shannon Thomas, Dylan Thomas, Cindy Thome, Denae Villines, Amber Wenzel, Eilleen Wilbert, Avi Woods, Caressa Presley, Brianna Newport, Olivia Allen, Miranda Santiago, Cheryl Sauerwein, Jill Longstaff, Sadie Allen, Candace Heckart                                                                                                                                                                                                                                                                                                                                                                                                                                                                                                               | Alliance for Multispecialty Research        | Newton, KS        |
| Gregory Mark Gottschlich, MD | Melissa Gottschlich, Steven Anderson, Gregory Mark Gottschlich II, Mary Woeste, Kate Harden, Cindy Young, Michael Pordy, Audrius Ruksenas, Lacy Baird, Kim Krogman, Lori Stanton, Melissa Fuson, Mason Urban, Christine Watson, Richard Powell, Mary Smith, Jacob Sekinger, Diamond Russell, Nicole Lim, Mylene Asmar-Rios, Yusef Museitif, Craig Mitchell, Tarik Whitham, Zachary Rutledge, Troy Porter, Andrea Newlands, Jami Ramsey, Mary Frances Curry, Nishay Holloman, Crystal Barket, Michelle Spear, Shelley Mahan, Taeleigra Greene, Zachary Eardley, Gen Moussa, Mary Ann Gottschlich                                                                                                                                                                                                                                                                                                                                                                                                                                                                                                                                                                                                                                          | New Horizons Clinical Research              | Cincinnati, OH    |
| Sinikka L. Green, MD         | Julie Hamilton, Alex Fuller, Jeanette Dickhaus, Colleen Jacobson, Triny Cooper, Michelle Jackson, Taylor Evans, Tabitha Judd, Kathryn Alexander, Megan Rosallo, Sikhongi Phungwayo, Robin Dotson, Dana Finley, Michael Vasquez, Cyndi Foster, Gregg Lucksingier, Sarah Smiley, Jayasree Krishnakutty, Ray Coon, Grishma Dhimmer, Melanie Wilkerson, Tatum Shawver, Mercedes Coffman, Devin Teal, Laura Crenshaw                                                                                                                                                                                                                                                                                                                                                                                                                                                                                                                                                                                                                                                                                                                                                                                                                          | Advanced Clinical Research                  | Cedar Park, TX    |
| Carl P. Griffin, MD          | William Schnitz, Andrea Romero, Kim Hamilton, Raymond Cornelison, Angela Genovese, Shelly Brunson, April Green, Lacey Dietz, Kim Calloway, Chris Hyatt,                                                                                                                                                                                                                                                                                                                                                                                                                                                                                                                                                                                                                                                                                                                                                                                                                                                                                                                                                                                                                                                                                  | Lynn Health Science Institute               | Oklahoma City, OK |

| Principal Investigator    | Study Team                                                                                                                                                                                                                                                                                                                                                                                                                                                                                                                                                                                                                                                                                                                        | Institution                                                              | Location             |
|---------------------------|-----------------------------------------------------------------------------------------------------------------------------------------------------------------------------------------------------------------------------------------------------------------------------------------------------------------------------------------------------------------------------------------------------------------------------------------------------------------------------------------------------------------------------------------------------------------------------------------------------------------------------------------------------------------------------------------------------------------------------------|--------------------------------------------------------------------------|----------------------|
|                           | Destiny Heinzig-Cartwright, Chalimar Rojo, Sharee Wright, Kathi Shaw, Michael Pojezny, Avery Keller, Krystal Hightower, Dalia Tovar, Shanda Gower                                                                                                                                                                                                                                                                                                                                                                                                                                                                                                                                                                                 |                                                                          |                      |
| Milton Haber, MD          | Maria Candelario, Martha Bunnell-Pollak, Lauren Wade, Jackie Ziegler, Deena Ramirez, Perla Avalos, Maria Drada, Jasmine Ali, Jessica McDowell, Kehinde Busari, Patricia Church, Ronald Meza, Marco Vela, Esteban Zurita, Chris Connolly, Ruben Del Bosque, Alisha Lutat, Chelsea Fleming, Brett Potthoff, Anita Suri, Cynthia Priester, Brenda Hernandez, Veronica Procasky, Eva Cerreta, Matt Honold, Melinda Rodriguez, Maria Regalado, Jordan Stauffer                                                                                                                                                                                                                                                                         | Laguna Clinical Research Associates                                      | Laredo, TX           |
| Greg Hachigian, MD        | Michael Cancilla, Ricardo Castellanos, Angela Cuellar, Yaman Darmarathne, Shaile Faulker, Yana Gordeyeva, Michelle Hisey, Ashley Jungsten, Kristin Kiersey, Pawandeep Nagra, Nav Nagra-Kooner, Jazmin Nauta, Masaru Oshita, Kenneth Quick, Julie Raygoza, Amanny Sadek, Melisa Tinder, Jhoana Torres, Deborah Murray, Kristen Kiersey                                                                                                                                                                                                                                                                                                                                                                                             | Benchmark Research                                                       | Sacramento, CA       |
| Laurie J. Han-Conrad, MD  | Brandon Baldwin, Lucian Cappoli, Tenisha Garcia, Ella Grach, Brenda Grande, Nicolle Mendez, Natalie Moy, Matthew Musikanth, Karen Mylerberg, Brennan Opanasenko, Mark Pulera, Patti Sanchez-Emery, Mireles Sarah, Todd Simmons, Denis Tarakjian                                                                                                                                                                                                                                                                                                                                                                                                                                                                                   | WR-Medical Center for Clinical Research                                  | San Diego, CA        |
| Wayne Lee Harper, MD      | Toni Bland, Lori Bridges, Lucian Cappoli, Lisa Cohen, Leah Corts, Annie Craft, James Earnhardt, Lynn Eckert, Aubrey Farray, Laura Hoer, Matthew Hong, Chris Hoyle, Jenee Jiggetts, Brian Joseph, Bradley Killebrew, Kendra Lisee, Lucie Mangala, David Musante, Adnan Nasir, Amanda Olsen, Brennan Opanasenko, Marci Parks, Marion Peoples, Katherine Schuch, Judith Shand, Sabine Ucik, Douglas Wadeson, Barbara Wheeler                                                                                                                                                                                                                                                                                                         | M3 Wake Research                                                         | Raleigh, NC          |
| Ripley R. Hollister, MD   | Jeremy Brown, Brandy Ball, Jeremy Brown, Valerie Dyster, Dalia Jeronimo, Shelby Pickle, Michael Pojezny, Melody Ronk, Kathi Shaw, Bobbi Shofner, Jami Wagner, Meghan York, Jill York                                                                                                                                                                                                                                                                                                                                                                                                                                                                                                                                              | Lynn Institute of the Rockies                                            | Colorado Springs, CO |
| Lisa A. Jackson, MD, MPH  | Marilyn Nguyen, Maya Dunstan, Barbara Carste, Sarah Friend, Diana McFeters, Lynn Gross, Mohamed Ajenah, Jana Ffitch, Audra Mccoy, David Skatula, Susan Lasicka, Kimberly Brinker, Karen Sherwin, Melissa Scheer, Paula Lins, Roger Calvert, Roxanne Erolin, Stella Lee, Vi Tran, Stephanie Pimienta, Bruce Douglas, Lee Barr, Colin Fields, Erika Kiniry, Joe Choe, Janice Suyehira, Joyce Benoit, Michael Witte, Rebecca Lau                                                                                                                                                                                                                                                                                                     | Kaiser Permanente Washington Health Research Institute                   | Seattle, WA          |
| Spyros Andrews Kalams, MD | Greg Wilson, Kyle Rybczyk, Katie Crumbo, Carly Griffin, Latoya Hannah, Amy Kerrigan, Valerie Mitchell, Jenna Caserta, Mary Downey, Nicole Swindle, Shonda Sumner, Amber Massey, Trudy Sullivan, Rita Smith, Cindy Nochowicz, Eric Olson, Christian Warren, Josh Simmons, Dana King, Gwendolyn Rees, Matt Donio, Jesse Case, Keith Richardson, Jarissa Greenard                                                                                                                                                                                                                                                                                                                                                                    | Vanderbilt University Medical Center                                     | Nashville, TN        |
| Colleen Kelley, MD, MPH   | Valeria D. Cantos, Sheetal Kandiah, Carlos del Rio, Christina Bacher, Hannah Huston, Juliet Brown, Divya Bhamidipati, Nithin Gopalsamy, Brittany Lynn Speigel, Elizabeth (Betsy) Hall, Brandon Spratt, Kiran Dhillon, Caitlin Moran, Michael Chung, Felecia Wright, Marcia Peters, Rondell Jagers, Vanessa Soliman, Ron Gaston, Christopher Foster, Sarah Wiatrek, Bezuayehu Mandefro, Pamela Weizel, Pamela Linkford-Turner, Anandi Sheth, John Gharbin, Catherine Abrams, Philip Powers, Paulina Rebolledo, Christin Root, Tiraje Lester, Sha Yi, Damien Swearing, Fred Ede, Isaac Perez, Kelly Likos, Meen Dhir, Aastha KC, Gabriela Georgial, Tucker Colvin, Nabeel Yar Khan, Valarie Hunter, D'Jamel Young, Felecia Atkinson | Emory University Emory University – Ponce de Leon Clinical Research Site | Atlanta, GA          |
| Christina Kennelly, MD    | Jacob Coleman, Brittany Bundeff, Melissa C. Hennessey, Kenneth Owen, Caroline Wilds Wilds, Jennifer Womack, Susan Martello, Chiedza Hooker, Robert Brownlee, Melissa James, Deborah Wesley-Farrington, Lori Whiteheart, Hala Webster, David Framm, Cortney Fretz, Gwyn Gibson, Susan Donahue, Kelly Woodell, Linda McCarty, Jim Vesely, Scott Chatterton, Andrew Ottesen, Enrico Belgrave, Krishna Shah, James Chester Alexander, Brittain Callahan                                                                                                                                                                                                                                                                               | Javara                                                                   | Charlotte, NC        |
| Shishir Kumar Khetan, MD  | Taja Adams, Tanya Alexander, Tanya Alexaner, Sydney Barmoy, Jake Bart, Kira Bell, Ira Berger, Jemario Blackwell, Priscilla Buahin, Bounphone Chanthavong, Juliana DeVito, Azure Erskine, Brandon Essink, Laura Falcone, Debra Gabrielson, Beau Garland, Barb Geiger, Tiana Oliver, Courtney Heisey, Sucharita Katikala, Andrew Kimball, Heather Lang, Jeanette Lee, Asefa Mekonnen, Devan Myers, Kimberly Nieves, Allison O'Brien, Oyebisi Olanrewaju, Nicole Osborn, Adunola Oshiyoye, Rahul Patel, Alan Pollack, April Poole, Collin Smith, Kathryn Stoddard, Chao Wang, Sean Whelan, Jonathan Whelan, Graciela Zapata, Nan Zhai                                                                                                | Meridian Clinical Researc                                                | Rockville, MD        |
| Murray A. Kimmel, DO      | Alexa Diec, Ann Riley, Bette Denmat, Bram Swarr, Christina Raidl, Dania Billman, Denise Dixon, Donald Dawson, Elaine Crudo, James Crowley, Katrina Carlson, Kaylie Worzick, Laura Worth, Lisbeth Gordon, Marion Oliver, Robert Holt, Simmy Pinto, Taylor Atkinson, Traci Mitchell, Lana Ghomrawi, Norma Rokoff                                                                                                                                                                                                                                                                                                                                                                                                                    | Optimal Research                                                         | Melbourne, FL        |

| Principal Investigator      | Study Team                                                                                                                                                                                                                                                                                                                                                                                                                                                                                                                                                                                                                                                                                                                                                                                                                               | Institution                                | Location         |
|-----------------------------|------------------------------------------------------------------------------------------------------------------------------------------------------------------------------------------------------------------------------------------------------------------------------------------------------------------------------------------------------------------------------------------------------------------------------------------------------------------------------------------------------------------------------------------------------------------------------------------------------------------------------------------------------------------------------------------------------------------------------------------------------------------------------------------------------------------------------------------|--------------------------------------------|------------------|
| Judith L. Kirstein, MD      | Jared Bradshaw, Krista Forster, Jeanette Dickhaus, Marcia Bernard, Erica Sanchez, Nikki Abels, Cynthia Kunakom, Vanessa Vandergoot, Jessica Fisher, Carol Remigio, Jourdan Manfred, Frederick Lloyd, Tiffany Williams, Clarisse Baudelaire, Lovette Cherelle, Nolan Mackey, Alan Valenzuela, Theodore Wyman, Alyssa Taber, Karen Myers, Craig Koch                                                                                                                                                                                                                                                                                                                                                                                                                                                                                       | Rancho Paseo Medical Group                 | Banning, CA      |
| Michael J. Koren, MD        | Shannon Trull, Amanda Elwood, Mary Strickland, Ivy Gulliermo, Christopher Ganzhorn, Sonia Gerardo, Taylor Johnson, Victoria Kaposchansky, Cassie Lawler, Laura Little, Amanda Pratt, Sheldon Warren, Andrea West, Emery Noles, Nathaniel Grant, Jillian Agnew, Lori Alexander, Brenda Anderson, Deirdre Arrington, Sara Benner, Lisa Carl, Allison Crain, Nafisa Ishaku, Robert Nix, Sharon Smith, Amber Devries, Sandy Salceiro, Opara Chukwudi, Mikaela Karney-Trull, Ramil Castillo, David Graham, Gail Lowe, Alexander Hill, Carolyn Tran, Jeffrey Jacqmein, Darlene Bartilucci, Alpa Patel, Janet Garvey, Mitchell Rothstein, Kenneth Aung-Din, Margaret Gannaway, Arman Mughal, Sandra Fuit, Jolene Wolfer, Erin Schelhorn, Jacob Wolfer, Madison Martinez, Melissa Parks, Patricia Neal                                           | Jacksonville Center for Clinical Research  | Jacksonville, FL |
| Karen L. Kotloff, MD        | Matthew Laurens, Milagritos Tapia, Lisa Chrisley, Cheryl Young, Barbara Albert, Robin Barnes, Shernel Barrett, Andrea Berry, Melissa Billington, Shannon Bittner, Colleen Boyce, Faith Pa'Ahana Brown, James Campbell, Regina Carpenter, Jamonie Carter, Ginny Cummings, Brenda Dorsey, Jorge Flores, DeAnna Friedman-Klabanoff, Shirley George, Nancy Greenberg, Hassan Haji, Elizabeth Hammershaimb, Susan Holian, Leslie Howe, Myounghee Lee, Alyson Kwon, Kirsten Lyke, Alma Valle Maldonado, Jennifer Marron, Kaitlin Mason, Monica McArthur, Rosa McBryde, Sherry McCammon, Sandra Molina, Kathleen Neuzil, Daniele Nitkowski, Justin Ortiz, Rekha Rapaka, Mardi Reymann, Toni Robinson, Wanda Somrajit, Mark Travassos                                                                                                            | University of Maryland, School of Medicine | Baltimore, MD    |
| Mark E. Kutner, MD          | Amanda Colina, Isett Caro, Frances Beltran, Jessie Downs, Jonathan Fernandez, Mariete Renden, Mirnaya Mujica-Alabaci, Susel Figueredo, Yanelis Dominguez, Jaime Blandon, Bryan Ruiz, Leidy Montoya, Edgardo Rodriguez, Jessie Downs, Jason Rothschild, Janett Acle, Yaime Martinez, Soraya Ricardo, Maria Hernandez Moran, Eloisa Guerra, Heidie Perez, Claudia Rodriguez, Victoria Moreno, Vanessa Hechavarria, Saray Carvajal, Daniel Lopez, Carlos Iviricu, Neiner Enriquez, Paola Garcia, Chris Hoyle, Marianela Carvajal, Janet Mendez, Edisleidy Mesa, Marco Ramirez, Dalila Del Valle, Jennifer Ortega, Yeni Hernandez, Jhobana Vargas, Carmen Amador, Juan Delgado, Maury Santos, Meredith Arguelles, Leyanis Coello, Vanessa Ansorena, Jorge Caso, Stacy Machado, Raydel Valdes, Gianni Lightbourn, Dayami Dovalos, Alain Chang | Suncoast Research Group                    | Miami, FL        |
| Mimi Van Der Leden, MD, PhD | Chrishea Harvey, Tricia Oyeyemi, Aicha Moutanni, Stephanie Melton, Peta-Gay Jackson Booth, Jennifer Yoon, Gloria Kim, Atanas Filev, Francis Uwandu, Meyling Lopez, Janice Spreitzer, Courtney Gennes, Xiangfei Cheng, Matthew Van Sickle, Nick Bart, Brianne Okunji, Frank Maloba                                                                                                                                                                                                                                                                                                                                                                                                                                                                                                                                                        | Optimal Research                           | Rockville, MD    |
| Michael L. Levin, MD        | Brennan Opanasenko, Yajaira Ramos, Shonda Lester, Rebecca Boucher, Shawn Harrell, Shon Boucher, Patti Sanchez, Nina Scharbach, Alex Sanchez, Shyane Raniello, Wendy Guerra, Krystal Tyner, Kimberly Temple, Ruby Ortiz, Daniel Terreault, Amy Kill, Jade Odynski, Adolfo DeLeon, Debbie Carter, Eduardo Rodriguez, Julia Gass, Sara Esparza, Sierra Dansbee, Tammy Harrison, Marcy Kulic, Lucian Cappoli, Mora Klim, Matthew Fenner, Heather Jimenez, Shradhdha Dubal, Julie Hussey                                                                                                                                                                                                                                                                                                                                                      | WR-Clinical Research Center of Nevada      | Las Vegas, NV    |
| Michael Lewis, MD           | Nancy Mohler, Mai Pham, Ron Waldorf, Elham Ghadishah, Samantha Feril, Stella Lee, Dzuyen Nguyen, Ruoxiang Wang, Justine Velandria, Benjamin Dreskin, Joseph Yusin, Lauren Vigil, Sara Wong, Suchi Tiwari, Joseph Piseгна, Sunita Dergalust, Wayman Lee, Krissa Caroff                                                                                                                                                                                                                                                                                                                                                                                                                                                                                                                                                                    | VA Greater Los Angeles Healthcare System   | Los Angeles, CA  |
| Gregg H. Lucksinger, MD     | Jaleh Ostovar, Craig Koch, Danuel Hamlin, Kelly Chase, Jeanette Dickhaus, Edward Kerwin, Frederick Forde, Allison Alvord, Dawn Stewart, Dan Hamlin, Kevin Parks, Ryan Israelsen, Kary Kelly, Tiffany Smith, Melissa Myers, Ryan Rackley, Audrey Kuehl, Savannah Peterson, Hannah Hall, Jay Weisbart, Alison Dodenhoff, Emily Kelly                                                                                                                                                                                                                                                                                                                                                                                                                                                                                                       | Velocity Clinical Research                 | Medford, OR      |
| Mary Beth Manning, MD       | Carol Salango, Alec Ireland, Lisa Hoagland, Jeanette Dickhaus, Toby Briskin, Joan Rothenberg, Michael Gaston, Sharita Tedder-Edwards, Denise Roadman, Megan Sokolowski, Tina Shickluna, Katherine Bielanski, Samantha Hood, Talia Chandler, Brianna Arman, Melinda DeLong, Naqib Ahmad, Karly Tarase, Jade Svoboda, Lisle Merriman, Melisa Sebera, Emma Landskroner, Amy Maroun, Brooke Glivar, Jennifer Gaston, Sarah Dzigiel, Cassandra Uminski, Karol Sabol, Devan Patel, Nick Zarbo, Briana Jackson, Brian Sharpe, Nicole, Baitt, Kaitlyn Duffy, Gabrielle Jacobs, Ann Czuprun, Tracee Cash, Diamond Ivey, Kaitlyn Rubell                                                                                                                                                                                                            | Rapid Medical Research                     | Cleveland, OH    |



| Principal Investigator          | Study Team                                                                                                                                                                                                                                                                                                                                                                                                                                                                                                                                                                                                                                                                                                                                                                                                                                                                                                                                                                                                                                                                                                                                                                                                                                                                    | Institution                                                      | Location        |
|---------------------------------|-------------------------------------------------------------------------------------------------------------------------------------------------------------------------------------------------------------------------------------------------------------------------------------------------------------------------------------------------------------------------------------------------------------------------------------------------------------------------------------------------------------------------------------------------------------------------------------------------------------------------------------------------------------------------------------------------------------------------------------------------------------------------------------------------------------------------------------------------------------------------------------------------------------------------------------------------------------------------------------------------------------------------------------------------------------------------------------------------------------------------------------------------------------------------------------------------------------------------------------------------------------------------------|------------------------------------------------------------------|-----------------|
| Kristen Marks, MD               | Grant Ellsworth, Tina Wang, Timothy Wilkin, Mary Vogler, Carrie Johnston, Marshall Glesby, Roy Gulick, Ole Vielemeyer, Rebecca Fry, Todd Stroberg, Caitlin Rhoades, Noah Goss, Shaun Barcavage, Valery Hughes, Jonathan Berardi, Caroline Greene, Sarah Galloway, Caique Mello, Ashley Machado, Mia Crowley, Monique Williams, Katherine Fee, Elizabeth DeJesus, Andrew Yu, Minkyung Lee, Susan Herder, Mary Ann Zweibel, Patrice Weller, Antonio Rivera-Lopez, Edward Kenny, Hetal May, Natella Fridman, Parul Shah, Ruby Lee, Venus Fernandez, Victoria Lesina, Celine Arar, Byron Bullough, Kinge-Ann Marcelin, Brian Mangano, Jessenia Fuentes, Jiamin Li, Genessi Rodriguez, Catherine Jerry, Nadi Islam, Liqun Cai, Wayne Burns, Akinbayo Caulcrick, Andrika Thomas, Barbara Batog, Guoan He, Sara Yoder, Tamara Crowder, Gianna Resso, Sophia Alvarez, Tahera Begum, Elizabeth Connolly, Roxanne Rosario, Paul Kim, Steven Wang, Vasilika Koci                                                                                                                                                                                                                                                                                                                         | Cornell Clinical Trials Units - Weill Cornell Chelsea and Uptown | New York, NY    |
| Judith Martin, MD               | Alejandro Hoberman, Timothy Shope, Gysella Muniz, Sonika Bhatnagar, Kumaravel Rajakumar, Anne-Marie Rick, Peri Unligil, Jennifer Nagg, Melissa Andrasko, Mary Ann Sieber, Jennifer Opal, Lalicia Roman, Spenser Kinsey, Michelle Burke, Matthew Lee, Dominic Kramer, Linette Milkovich, Emily Dougherty, Emily Carney, Shannon Mance, Nader Shaikh, Diana Kearney, Jamie Fries, Lisa Vavro, Shayla Goller                                                                                                                                                                                                                                                                                                                                                                                                                                                                                                                                                                                                                                                                                                                                                                                                                                                                     | UPMC University Center                                           | Pittsburgh, PA  |
| John W. McGettigan, Jr., MD     | Walter Patton, Jennifer Schneider, Riemeka Brakema, Heeten Desai, Mikell Brett Karsten, Patricia Jalomo, Cindy Finch Benoy, Karin Choquette, Jonlyn McGettigan, Yvonne De Los Reyes, Melissa Cozzens, Amanda Hermsillo, Cindy Montgomery, Susan Tarwid, Annette Elzy, Tianna Young, Saysamone Banks, Cristina Fernandez, Damaris Atondo, Zoe Sesma, Norma Barrientos, Maggie Tono, Kisha Adams, JoAnn Wilkins, Arianna Bermudez, Carol Sayer, Julie McDowell, Angelina Navarro, Mercedes Sullivan, Crystal Mata, Sheldon Gingrich, Aaliyah Sestiaga, Gia Longo                                                                                                                                                                                                                                                                                                                                                                                                                                                                                                                                                                                                                                                                                                                | Quality of Life Medical & Research Centers                       | Tucson, AZ      |
| Mark Montgomery McKenzie, MD    | Tiffany Jewell, Zackery Harmon, Michael Elizabeth, Christy Sweet, Teresa Deese, Catherine Schon, Misti Earwood, Lou Cappoli, Brennan Opanasenko, Lisa Guider, Michelle Forgey, Justian Jarrett, Rachel Scott, Elizabeth Michael, Erica Osmundsen, Andrew Wood, Shelly Brooks, Gisela Heintz, Lilian Nukuna                                                                                                                                                                                                                                                                                                                                                                                                                                                                                                                                                                                                                                                                                                                                                                                                                                                                                                                                                                    | WR-ClinSearch                                                    | Chattanooga, TN |
| Vicki E. Miller, MD             | Sajjad Naqvi, Soofia Masood, Fredric Santiago, Sonia Guerrero, Subhash Koneru, Nirja Shah, Andrea Torres, Ramani Gali, Talha Baig, Heather Leary, Affah Ayub, Nayab Goher, Patti Tate, Reagan Reed, Muhammad Irfan, Amy Starr, Alefiyah Motiwala, Julia Kenny, Victoria Aguilar, Jessica Arguijo, Insiya Valika, Victoria Aguilar, Jagruti Patel, Anna Pena, Faryal Mahmood, Blanca Gomez, Nancy Torres, Kristyn Lati, Tarori Mark, Laura Djampou, Lindsey Kueng, Marianne Tadros, Mohammad Millwala, Monica Murray, Murtaza Marvi, Shivani Shah, Vanessa Gonzalez, Zohair Harianawala, Zainab Rizvi, Ambily Dileep, Jaquelyn Gonzales, Ragen Powell, Carolina Deandres, Syed Fahad Ali Kazmi, Sandra Natalia Perez, Shannon Amacker, Shiela Varghese                                                                                                                                                                                                                                                                                                                                                                                                                                                                                                                         | DM Clinical Research                                             | Tomball, TX     |
| Gowdhami Mohan, MD              | Rodolfo Barrera, Emma Partin, Kelly White, Ashley Rochester, Charles Thompson, Stefanie Tyson, Ashton Sheriff, Alyssa-Kay Peay, Kayla Corn, Barbara A. Richardson, Kristin Miller, Steven Clemons, Cameron King, Emma Partin, Gary Clemons, Brianna Starr, Danyel Johnson, Taylor Davis, Niki Tyson                                                                                                                                                                                                                                                                                                                                                                                                                                                                                                                                                                                                                                                                                                                                                                                                                                                                                                                                                                           | VitaLink Research                                                | Anderson, SC    |
| Kathleen M. Mullane, DO, PharmD | David L. Pitrak, Cheryl Nuss, Karen Cornelius, Randee Estes, Amy Lockett, Michelle Moore, Judi Pi, Stephen Schrantz, Jill Stetkevych                                                                                                                                                                                                                                                                                                                                                                                                                                                                                                                                                                                                                                                                                                                                                                                                                                                                                                                                                                                                                                                                                                                                          | University of Chicago                                            | Chicago, IL     |
| Joseph Lee Newberg, MD          | Mary Reyes, Nicole Leahy, Victoria Andriulis, Herbert Whinna, Patricia James, Lana Ghomrawi, Carole Kempfer, Miriam Arroyo, Maria Castro, Anna Maddox, Reuben Martinez, Jacquilyn McCormick-Burks, Laura Pearlman, Rosalinda Vazquez, Shaheera Suleiman, Neha Atal, Rosalind Vazquez                                                                                                                                                                                                                                                                                                                                                                                                                                                                                                                                                                                                                                                                                                                                                                                                                                                                                                                                                                                          | Synexus Clinical Research                                        | Chicago, IL     |
| Richard M. Novak, MD            | Regina Harden, Maria Schwarber, Michael Pacini, Rebeca Gansari, Margie Villarreal, Stephanie Martin, Michelle Lee, Richard Morrissy, Taylor Ellis, Samuel Rene, Tara Cobbs, Claudia Preciado, Scott Borgetti, Maximo Brito, Olamide Jarrett, Mahesh Patel, Tracy Cable, Charity Ball, Maryann Holtcamp, Rodrigo Burgos, Sarah Michienzi, Emily Drwiega, Mikayla Johnson, Fischer Herald, Benjamin Ladner, Minseung Chu, Carolyn Dickens, Alfredo Mena Lora, Stockton Mayer, Andrea Wendrow, Habiba Sultana, Nanu Nunwar, David Chan, Marla Schwarber, Khandaker Anwar, Mahmood Ghassemi, Md Ruhul Amin, Doris Carroll, Rosa Valencia, Michelle Agnoli, Elena Linas, Samuel Rene, Liam Morrissy, Adrian Raygoza, Addis Mekkonen, Lisa Lindemann, Daniel Meslar, Karen Pacini, Corey Ringhisen, Amy Kennedy-Krage, Claudia Miller, Lorna Sanchez McCann, Gizelle Alvarez, Nia Moragne-Oneal, Nusirat Williams, Ian Feather, Nikki Griffith, Wardrick Nealon, Rencyce Powell, Nila Safaeian, Monica Gingell, Diana Bahena, Gerald Beck, Brad Farrington, Rod Reyes, Monica Wilson, Juline Wondrasek, Kimberly Shapiro, Shannon Whitted, Victoria Roehl, Braulio Carrasco, Michael Chen, Olivia Murray, Yasiel Lacalle, Tessa Eckley, Anna Schluckebier, Kevin Cao, Elise DeBruyn | University of Illinois at Chicago - Project WISH                 | Chicago, IL     |

| Principal Investigator     | Study Team                                                                                                                                                                                                                                                                                                                                                                                                                                                                                                                                                                                                                                                                                                                                                                                                                                                                                                                                                                                                                          | Institution                                   | Location           |
|----------------------------|-------------------------------------------------------------------------------------------------------------------------------------------------------------------------------------------------------------------------------------------------------------------------------------------------------------------------------------------------------------------------------------------------------------------------------------------------------------------------------------------------------------------------------------------------------------------------------------------------------------------------------------------------------------------------------------------------------------------------------------------------------------------------------------------------------------------------------------------------------------------------------------------------------------------------------------------------------------------------------------------------------------------------------------|-----------------------------------------------|--------------------|
| Paul Joseph Nugent, DO     | Leonard Singer, Jennifer Jones, April Smith, Georgettea Geuss, Lana Ghomrawi, Christine Bennett, Norma Blevins, Linda Brotherton, Michele Byrd, Krista Doss, Victoria Holden, Christine Hull, Jean Montgomery, Nancy Cipollone, Savannah Tortline, Brandon Brown, Meagan Thomas, Katie Ziska, Dana Sias, Hannah Wagner                                                                                                                                                                                                                                                                                                                                                                                                                                                                                                                                                                                                                                                                                                              | Synexus Clinical Research                     | Cincinnati, OH     |
| Jeffrey Scott Overcash, MD | Hanh Chu, Kia Lee, Karla Zepeda, John Rodriguez, Adam Prince, Yashveer Dubbula, Elizabeth Tomatsu Michael Voskarian, Crystle Rajania, Stephanie Ramirez, Claudia Camacho, Lauren Arnett, Kecia Darbeau, Ashley Smith, Kimberly Quillin, Cesar Ramirez, Daniel Robitaille, Erica Sanchez, Allie Davis, Michael Waters, Pat Kappen, Valerie Horne, Thao Vuong, Andrew Dennis, Nikki Abels, Dominique Panis, Richard McQuaid, Whitley Harbison, Erika Trujillo, Andrea Garcia, Jose Jacob Esparza, Carlos Vera, Raquel Taitingfong, Cathy Meza, He Pu, Jackielynn Smith, Shandel Odom, Zahira Nieves, Ashleigh Lindsay, Ariana Nasatka, Jose Cazarez, Nora Martinez, Angela Hunt, Antonio Delgado, Linda Vega, Angela Anorve, Erica Martinelli, Melania Riordan, Sylvia Lindholm, Gina Ciezkowski, Grecia Perez, Jacob Pineda, Nathan Tyler, Ranya Salem, Amara Yilmaz, Jessica Gonzales, Zabrina Ruiz, Laura Castillo, Yajaira Contreras, Angelica Guzman, Makenna Orel, Jeffery Alvarez, Gordon Bovee, Roxana Ramirez, Joan Esquivel | Velocity Clinical Research, San Diego         | La Mesa, CA        |
| James Todd Peterson, MD    | Christopher Mickelson, Madeline Maldonado, Alison Charlton, Ashley Bragg, Sean Hansen, Emily Wilcox, Colby Bostock, Megan Henry, Pam Iwasaki, Bradley Young, Katelyn Walker, Joy Nguyen, Lindsey Bevan, Megan Grimmer, Madeline Grote, Heather Littell, Natalie Bee, Alexander Clark, Shana Eborn, Susan Edwards, Dan Henry, Heather Jackson, Gerald Kelly, Issac Pena-Renteria, Jacqueline Rohrer, Jack Taylor, Brooke Barrick, Ty Henry, Anna Dansie, Kenadie Hamblin                                                                                                                                                                                                                                                                                                                                                                                                                                                                                                                                                             | J. Lewis Research                             | Salt Lake City, UT |
| Paul Pickrell, MD          | Susan Bonner, Blaire Graham, Staci Taggart, Hussain Malbari, Tiffany Lemuz, Ethan Shotton, Andrew Bell, Megan Malek, David Pampe, Carol Ann Linebarger, Michelle Peterson, Brandi Chalman, John Luna, Elizabeth Santellanes, Christina Martinez, Lisa Johnson, Lisa Savage, Melissa Winn, Wendi McKenzie, Eileen Euperio, Stefanie Mott, Paul Menefee, Katie Caballero, Darrell O'Brien, Morgan Schulle, Kate Jurek, Olivia Hapanowicz                                                                                                                                                                                                                                                                                                                                                                                                                                                                                                                                                                                              | Tekton Research, Inc.                         | Austin, TX         |
| Terry L. Poling, MD        | Meenakshi (Kavya) Natesan, Patricia Contreras, Denise Hole, Avi Woods, Jill Hiebert, Melissa Burton, Olivia Eagleson, Laura Holz, Terri Ford, Cindy Thome, Terry D Klein, Gregory Greer, Diandra Henriques, Tracy R Klein, Thomas C Klein, Christa Shue, Gina Young, Brenna Sprout                                                                                                                                                                                                                                                                                                                                                                                                                                                                                                                                                                                                                                                                                                                                                  | Alliance for Multispecialty Research          | Wichita, KS        |
| Bruce G. Rankin, DO        | Jennifer Dittman, Lora Parahovnik, Crystal Paccione, Melissa Hodges, Katina Marchione, Matt Maxwell, Any Dominy, Diana Toney, Andrea Marrafino, Laura Isbell, Leandro Fernandez, Claxton Copeland, Michelle Tutt, Adam VanDeusen, Kevin Feldman, Clark Mason, Tifany Huertas, Over Seijas, Jennifer Cline, Christian Beierschmitt, Ryan Hobbick, Jessica Gilliam, Jeanette de Leon, Iman Mencia, Daniel Layish, Vienna Bauer, Shatonia Fields, Albert Garcia, Carrie Rycort, Tasha Brocato, Marshall Nash, Samantha Watts, Amy Houck-Dominy, Angela Hammerle, Teresa Logsdon, Erika Wierzbicki, Taylor Martin, Ranie Hutchins, Fadhel Alyunis, Gail Lavine, Jeffery Hood, Robert Duran, Michelle Jones, Ginny McClanahan, Heather Jackson, Leandra Fernandez, Douglas Winter, Antonio Rivera, Amber Vasquez, Thais Truffa, Daniel Campbell, Grace Newcomb, Elizabeth Orlando, Steven Shinn, John Hill, Christina Isbell, Dhaneshwar Oomrow, Alicia Cevera                                                                           | Accel Research Sites                          | DeLand, FL         |
| Michele Diane Reynolds, MD | Jennifer Bashour, Robert Schmidt, Cynthia Mayeux, Uvoka Huffman, Lisa Nicholson, Jacklyn Newton, Lynn Yauch, Cathy Monroe, Kathleen Carty, Angelica Banks, Taylor Werner, Pamela Echols, Pauline Jackson, Chana Hines, Lorine Cook, Cristina Puig, Patrick Brooks, Jennifer Ruiz, Deanna Bowman, Ladina Garcia                                                                                                                                                                                                                                                                                                                                                                                                                                                                                                                                                                                                                                                                                                                      | Synexus Clinical Research                     | Dallas, TX         |
| Rambod Rouhbakhsh, MD, MBA | John Johnston, Richard Calderone, Tasha Stevenson, Tameka Fortune, Brandi Pace, Adreanna Pou, Jerrica Sullivan, Yolanda Lewis, April Rouse, Tiffany Jefferson, Elizabeth Danford, Jeff Repper, Mason Boutwell, Alexycia Washington, Krista Hirth, Meagan Grabel                                                                                                                                                                                                                                                                                                                                                                                                                                                                                                                                                                                                                                                                                                                                                                     | MediSync Clinical Research Hattiesburg Clinic | Petal, MS          |
| Nadine Roupahel, MD        | Renata Dennis, Tigisty Girmay, Michelle Wiles, Sharon Curate-Ingram, Lauren Hewitt, Alexis Ahonen, Mari Hart, Sarah Bechnak, Erin Carter, Lauren Nolan, Daniel Sans Graciaa, Geoffrey Kamau, Easton Beshears, Sy Tran, Mary Atha, Mary Bower, Ghina Alaaedine, Brandy Johnson, Jacob Usher, Eileen Osinski, Erin Scherer, C. Tae Stallworth, Stephanie Ramer, Rose Pope, Esther Park, Francine Dyer, Laura Clegg, Rebecca Gonzalez, Stacey Wheeler, Susan Rogers, Vy Ngo, Vanessa Soliman, Kristen Unterberger, Bernadine Panganiiban, Christopher Huerta, Juton Winston, Ali Alvarez, Jianguo Xu, Colleen Kelley, Paulina Rebolledo, Nicholas Scanlon, Jessica Traenkner, Matthew Collins, Hollie Macenczak, Cassie Grimsely-Ackerley, Tiffany Lee, Amy Anderson, Michele Paine McCullough, Hannah Huston, Daniella Carter, Lisa Harewood, Srilatha Edupuganti, Varun Phadke, Mindee Adamson, Jeanne Allen, Debbie Bartenfeld, Lily Berz, Amy Cromwell, Sergio Cruz, Fred Ede, Monica Godfrey,                                     | Emory University - Hope Clinic                | Decatur, GA        |

| Principal Investigator   | Study Team                                                                                                                                                                                                                                                                                                                                                                                                                                                                                                                                                                                                                                                                                                                                                                                                                                                                                                                                                                                                       | Institution                            | Location          |
|--------------------------|------------------------------------------------------------------------------------------------------------------------------------------------------------------------------------------------------------------------------------------------------------------------------------------------------------------------------------------------------------------------------------------------------------------------------------------------------------------------------------------------------------------------------------------------------------------------------------------------------------------------------------------------------------------------------------------------------------------------------------------------------------------------------------------------------------------------------------------------------------------------------------------------------------------------------------------------------------------------------------------------------------------|----------------------------------------|-------------------|
|                          | Evan Gutter, Angelle Ijeoma, Sara Jo Johnson, Vinit Karmali, Dean Kleinhenz, Jennifer Kleinhenz, Alexandra Koumanelis, Maranda Leary, Tiraje Lester, Juliet Alise Morales, Shashi Nagar, Julia Paine, Dilshad Rafi Ahmed, Brittany Robinson, Amanda Rosner, Renee Silver, Trevor William Simon, Talib Sirajud-Deen, Damien Swearing, Maliya Tolbert, Pamela Turner, Chia Uzuegbunam, Claire Wan, Dongli Wang, Erika Wimberly, Jean Winter, Joy Winters, Yong Xu, Sha Yi                                                                                                                                                                                                                                                                                                                                                                                                                                                                                                                                          |                                        |                   |
| Richard Rupp, MD         | Amber Stanford, Megan Berman, Laura Porterfield, Gerianne Casey, Hala Ghoson, Doreen Jones, Michael Willig, Cori Burkett, Robert Cox, Amy McMahan, Diane Barrett, Kristin Pollock                                                                                                                                                                                                                                                                                                                                                                                                                                                                                                                                                                                                                                                                                                                                                                                                                                | University of Texas Medical Branch     | Galveston, TX     |
| Jamshid Saleh, MD        | Matthew Miles, Rafael Lupercio, Vicky Martin, Marla Clark, Matthew Pohlmeier, Ruba Zanaid, Veronica Blevins, Tara Ulberg, Carlyee Chambers, Marisol Corrales, Emily Crews, Mohamed Yassin, Sarah Sandberg, Frank Chen, Mandy Swanson                                                                                                                                                                                                                                                                                                                                                                                                                                                                                                                                                                                                                                                                                                                                                                             | Paradigm Clinical Research Center      | Redding, CA       |
| John W. Sanders, MD, MPH | Stacy Harpe-Hall, Jesse Hopkins, Ann Schweppe, Jaymous Fayssoux, Kathryn Bender, James Peacock, Katharine Pearsall, Brandy Snyder, Deidre Knox, Megan Thorpe, Melissa Ellingson, Brittany Bundeef, Lisa Ashworth, Meredith Hiatt, Ritu Rathee, Stacy Woodliff, Brian Strittmatter, Amanda Wright, Daisy DeWeese-Gatt, Caryn Morse, John Williamson, Samantha Wheeler, Lori Whiteheart, Susan Donahue, James Lovette, Kaitlyn Van Leuvan, Kelly Ledbetter, Scott Chatterton, Julio Nasim, Amie Sidberry, Ashley Davis, Carter Noecker, Chie Hooker, Johanna Breenan, Sam Cable, Anna Bowman, Stephanie Boothe, Shea Overcash                                                                                                                                                                                                                                                                                                                                                                                      | Wake Forest University Health Sciences | Winston Salem, NC |
| Howard I. Schwartz, MD   | Carlos Valladares, Jocelyn Morrera, Yulexis Amestoy, Tori Wallenburg, Thelma Beltran, Terry Piedra, Monica Garces, Alexandra Galvis, Wanda Delgado, Catherine Casas, Lesly Miguel Sosa, Vivian Rosales, Jose Fernando Henriquez, Mikael Yaniz, Beatriz Rivera, Peter Ventre, Gabriella Huyke, Maria Companioni, Jessie De Vega, Brianna Gamez, Stephanie Diaz, James Jean-Mary, Americo Padilla, Nikita Notise, Yorlina Luquetta, Monifa Wilson-Morris, Kenia Gutierrez, Roilan Garcia, Karla Pentzke, Leyda Valentin, Lazara Novas, Marilein Camacho, Jazmin Henfield, Laymis Alvarez, Myriam Rosado, Maxine Bryant, Maria Pinero, Laura Raucchi, Francisco Ramirez, Angelic Gamez, Mailin Perez, Yasmin Baddour, Hary Leon Joseph, Yaquelin De la Cruz, Dunia Torres, Rosaidaliz Carreira, Chanella Garcia, Surisaday Mederos, Jose Muniz, Karenda Plotka, Sara Gomez, Maria Soto, Cathy Cruz, Nelia Sanchez-Crespo, Jennifer Schwartz, Barbara Corral, Matthew Muniz, Dayana Deltejo, Ana Castro, Reem Hassan | Research Centers of America            | Hollywood, FL     |
| Nathan Segall, MD        | Michelle Sowell, Nancy Levine, Erynn McKinley, Hannah Smith, Karen Hickson, Elizabet West, Patrizia Greene, Jon Finley, Mildred Stull, Susan Jones, Jennifer LeBrun, Pamela Talbott, Kwannnda Whatley, Jeffrey Jones, Michelle Binns, Donna Toepfer, Cynthia Steele, Grace Newville, Gillian Waite, Cynthia Pinckney, Karen Yangapatty, Kiara Tyner, Kimberly Cobb, Kourtney Richardson                                                                                                                                                                                                                                                                                                                                                                                                                                                                                                                                                                                                                          | Clinical Research Atlanta              | Stockbridge, GA   |
| William Seger, MD        | Kimberly Pullen, Jean Seignon, Anthony Kim, Mohammed Antwi, Allison Green, Lizzy Seger, Elizabeth Boydston, Abdur Rafay Qadri, Deborah Devlin, Tasha Todd, Oluwatosin Akingbala, Alma Guel, Tisha Davis, Melody Dufrene, Samantha Loudermilk, Virginia Loudermilk, Crystal Starr, John Villegas, Ben Seger, Katherine Hollie                                                                                                                                                                                                                                                                                                                                                                                                                                                                                                                                                                                                                                                                                     | Benchmark Research                     | Fort Worth, TX    |
| Neil Parmanand Sheth, MD | Kenneth Stell, David Beckett, Enitt Gonzalez, Donna McGunigal, Amanda Burns, Nancy Wood, Shelley Miceli, Christina Avila, Rebecca Baker, Laura Vigliotti, Sarah Kading, Samer Salama                                                                                                                                                                                                                                                                                                                                                                                                                                                                                                                                                                                                                                                                                                                                                                                                                             | Synexus Clinical Research              | Glendale, AZ      |
| William B. Smith, MD     | Richard L Gibson, Jennifer Winbigler, Elizabeth Parker, Madison Watts, Suzann Cloninger, Talya Thomas                                                                                                                                                                                                                                                                                                                                                                                                                                                                                                                                                                                                                                                                                                                                                                                                                                                                                                            | Alliance for Multispecialty Research   | Knoxville, TN     |
| Joel Solis, MD           | Martha Carmen Medina, Xavier Morales, Hank Heller, Blake Torrence, Joanna Gurrola-Mahoney, Cynthia Bueno, Heather Holloway, Irving Salinas, Joel Perez, Paola Garcia, Erica Canales, Blanca Urbina, Brancisilio Gutierrez, Carolina Cantu, Chelsea Vargas, Cindy Vasquez, Cody McIntire, Gabriela Gutierrez, Hugo Sosa, Irvin Munoz, Jessica Estrada, Jonna Lopez, Kaegan Knox, Mirella Melendez, Natalia Valle, Natalie Echavarria, Nicole Litton, Amber Victor, Nancy Torrence, Madhu Shreya, Mathew Maran, Asfak Alam, Westly Keating, Tara Green, Devora Torrence, Gerardo Sedas, Shruti Konda, Prem Jangam, Mario Echavarria, Alejandro Silva, Anne McNulty, Daniel Contreras, Daniel Gomez, Edgar Garcia, Elizabeth Weber, Luis Lopez, Samuel Ramirez, Kayla Lopez, Pedro Penalo, Angel Salinas, Jaime Solis, Shannon Moyer, Aryana Ibarra, Guadalupe Gurrola, Jenna Anastasiades, Uchechi Ehiemua, Sara Solorzano                                                                                         | Centex Studies, Inc.                   | McAllen, TX       |
| Stephen A. Spector, MD   | Amaran Moodley, Jill Blumenthal, Baharin Abdullah, Christina Addington, Juan Carlos Alcantar, Deyna Arellano, Bernadette Cale, Brendan Costello, Tammelia Cotton-Pineda, Fanny Delebecque, Karen Deutsch, Aram Dimayuga, Son Do, Yasmeen Eshshaki, Aileen Everhart, Cindy Ewing, Veronica Figueroa, Medardo Gaytan, Crystal                                                                                                                                                                                                                                                                                                                                                                                                                                                                                                                                                                                                                                                                                      | University of California, San Diego    | La Jolla, CA      |



| Principal Investigator       | Study Team                                                                                                                                                                                                                                                                                                                                                                                                                                                                                                                                                                                                                                                                                                                                                                                                                                                                       | Institution                                 | Location           |
|------------------------------|----------------------------------------------------------------------------------------------------------------------------------------------------------------------------------------------------------------------------------------------------------------------------------------------------------------------------------------------------------------------------------------------------------------------------------------------------------------------------------------------------------------------------------------------------------------------------------------------------------------------------------------------------------------------------------------------------------------------------------------------------------------------------------------------------------------------------------------------------------------------------------|---------------------------------------------|--------------------|
|                              | Groom, Carolyn Hernandez, Heather Huitema, Benjamin Hull, Sylvia Isaac, Jaclyn Jaskowiak, Cindy Knott, Leander Lazaro, Thuan Le, Megan Loughran, Michelle Madey, Rosalva Martha-Patten, Colleen McLellan, Jeff Ledford-Mills, Asami Mimura, Patty Moraes, Jennifer Morales, Jessica Nasca, Phirum Nguyen, Marielys Padilla-Martinez, Dennis Perpetua, Mike Pizza, Shannon Ransom, Emily Rizo, Carlos Rojas, Thaine Ross, Marie Sagrado, Eugene Sato, Lisa Stangl, Ji Sun, Nancy Tang, Mina Trivedi, Rodney Trout, Donna Voss, Lindsey Woronicz                                                                                                                                                                                                                                                                                                                                   |                                             |                    |
| Cynthia Becher Strout, MD    | Rica Santiago, Yvonne Davis, Patty Howenstine, Alison Bondell, Jaime Robertson, Anissa Moussa, Geronimo Feria Garzon, Sierra Bennett, Marlana Petrie                                                                                                                                                                                                                                                                                                                                                                                                                                                                                                                                                                                                                                                                                                                             | Coastal Carolina Research Center            | Mount Pleasant, SC |
| Shobha Swaminathan, MD       | Amesika Nyaku, Tilly Varughese, Rondalya Deshields, Michelle L DallaPiazza, Elise Lewis, Jennifer Punsal, Mario Portilla, Malithi Desilva, Christina Daliani, Susana Rivera, Aidan Ziobro, Andressa Rebellatto, Brian Murloy, Christina Ninan, Ernest Pianim, Eunice Wang, Merit Henen, Muhammad Usman, Rebecca Kim, Shiao Wang, Gener Eric Cruz, Bethany Birago, Joyell Arcscott, Dina Meawad, Christie Lyn Costanza, Francesca Escalera, Zoraida Cruz-Barahona, Jared Khan, Valeria Cadoret, Jamir Tuten, Travis Love, Eric Asencio, Sukhwinder Singh                                                                                                                                                                                                                                                                                                                          | Rutgers New Jersey Medical School           | Newark, NJ         |
| Ramy Joseph Toma, MD         | Olivia Graves, Josiah Robinson, Patricia Hammonds, Lana Ghomrawi, Kara Quinnely, Shaun O'Conor, Michael Lambe, Rachel Stewart, William Kirby, Pink Folmar, Rachel Culbreth, Heidi Leblanc, Julie McDaniel, Rian Montgomery, Andrea Woodle, Samantha Williams, Hunter Russell, Shereen Lowe, Maureen Mayer, Hollis Ryan, Elaine Reese                                                                                                                                                                                                                                                                                                                                                                                                                                                                                                                                             | Synexus Clinical Research                   | Birmingham, AL     |
| Timothy P. Vachris, MD       | Mark Hutchens, Stephen Daniels, Margaret Wells, Sandra Clancy, Rebecca Martinez, Jessica Buot, Merissa Daugherty, Julie Hamilton, Kimberly Hernandez, Ashli Alejandro, Amy Collins, Monique Gawlik, Patricia Johnson, Maria Moreno, Ashley Washington, Tina Rountree, Daniel Dore, Ravi Davuluri, Ashlee Brunaugh, Jorge Martinez, James Hermon, Vianai Carreno, Mia Rountree, Colleen Coelho                                                                                                                                                                                                                                                                                                                                                                                                                                                                                    | Optimal Research                            | Austin, TX         |
| Keith William Vrbicky, MD    | Charles Harper, Chelsie Nutsch, Wendell Lewis III, Cathy Laffan, Linden DeBoer, Kayla Andal, Misty Appeldorn, Jenniger Grebe, Russell Herstein, Catherine King, Samantha Wieseler, Alisha Kiepe, Christy Lee, Kelsey Kelley, Kelli James, Ashley Frisch, Courney Green, Taysha Hingst, Jeni Hoppe, Kimber Breeden, Debra Gabrielson, Ginny McNew                                                                                                                                                                                                                                                                                                                                                                                                                                                                                                                                 | Meridian Clinical Research                  | Norfolk, NE        |
| Larkin T. Wadsworth III, MD  | Ashley Dale, Christy Schultz, Rebecca Munsch, Anya Penly, Liz Garner, Stephanie Tesson, George Cherniawski, Angie Kean, Dan Reed, Courtney Kubiak, Maureen Dempsey, Heather Cherniawski, Breanna Galibert, Kristin Branson, Laura Hartuppee, Karen Knapp, Horacio Marafioti, Lyly Dang, Jennifer Berry, Lauren Clement, Megan Dandurand                                                                                                                                                                                                                                                                                                                                                                                                                                                                                                                                          | Sundance Clinical Research                  | St. Louis, MO      |
| Jordan L. Whatley, MD        | Patricia Whatley, Christopher Dedon, Anika Payne, Amie Shannon, Kristen Losavio, Nicole Harrell, Mary Margaret Dobson, Lindsey Hall, Chaney Bennett, Crystal Rowell, Mimi Dimmick, Amy Thomassie, Kimber Breeden, Cody LaFleur, Makaylea Truitt, Taryn Collett, Emily Best, Alexandra Caillouet,                                                                                                                                                                                                                                                                                                                                                                                                                                                                                                                                                                                 | Meridian Clinical Research                  | Baton Rouge, LA    |
| Judith White, MD             | Amy Edridge, Chelsea Montalvo, Eugenia Clark, Lisa Russell, Zahra Somji, Lesli Leimer, Robert Meyer, Christine Murphy, Prity Patel, Sejal Patel, Ruben Moliere, Samantha Merveillard, Yarnick Mirjah, Bryn Walls, Joey Cruz, Aaron Cooper, Jessica Bienaime, Ashley Gilchrist, Alisa Petit, Tyler Knightly, Kimberly Stokes, Christina Rosario, Talhia Matos, Ilona Boggs, Nicholas Weber, Felix Busot, Linda Colon, Heather Gillenwater, Cristina Kaplun, Melissa Caputi, Shayna Siplin, Daminee Shah, Samuel Martin, Alexis Waldorf, Vihar Upadhyay, Adolfo Henriquez, Saskia Singh, Maria Roberts, John Caporelli, Shirley Salvador, Quevina Scarver, Vanessa Garcia, Taylor Moore, Jayasen Singh, Curshinda Galvin-Burch, Mary Kesner, Jasmin Gil, Shay Gray, Steven Monsegur, Michele Steinmetz, Michael Lambe, Heather Powell, Sandra Torres, Shaban Katbeh, Taylor Wilson | Synexus Clinical Research                   | Orlando, FL        |
| Priyantha N. Wijewardane, MD | Natalie Johnson, Martha Evans, Sondra Wright, Richard Pellegrino, Lastida Burns, Natasha Williams, Haylee Rowe, Kayla Graham, Amanda Horn, Eric Bravo, Jeffrey Thessing, A. Michele Maxwell, Amy Cooper, Lauren Evans, Tonya Cato, Haylee Tucker, Lesa Gann, Hannah Jones, Amanda May, Tiffany Walker, A. LeiAn Diaz, Laura Khalil, Lydia Purcell, Timothy Campbell, Charlotte Garcia-Velez, Andrea Scarborough, Beatrice A. Miller, Keith Bracy, Aujaniam Thompson, Cassandra Johnson, Krishana Day, Freddie Hicks, Jamie Pettus                                                                                                                                                                                                                                                                                                                                                | Baptist Health Center for Clinical Research | Little Rock, AR    |
| Barton G. Williams, MD       | Flo Abbott, Nicole Burton, Alice Cipollini, Madison Croucher, Philip Dattilo, Erin Harelson, Kelsey Heston, James Ingram, William H Jones, Karla Lane, Brandy Lowman, Evan Lucas, Megan Marles, Morgan Mathis, Angie Northcott, Clyda Pasquantonio, Alyssa Valente, Ciara Winders, Stephanie Graham                                                                                                                                                                                                                                                                                                                                                                                                                                                                                                                                                                              | Trial Management Associates                 | Wilmington, NC     |
| Marcus J. Zervos, MD         | Paul Kilgore, Mayur Ramesh, Jelena Verkler, Pardeep Pabla, Andrew Clark, Katrina Williams, Dee Dee Wang, Beverley Duthie, Samia Arshad, Alandra White, Anna Kern, Ashley Mattern, Bilqis Mosed, Dana Parke, Doreen Dankerlui, Dragana Spasevska,                                                                                                                                                                                                                                                                                                                                                                                                                                                                                                                                                                                                                                 | Henry Ford Health System                    | Detroit, MI        |

| Principal Investigator | Study Team                                                                                                                                                                                                                                                                                                                                                                                                                                                                                                                                                                                                                                                                                                                                                                                                                                                                                                                                                                                                                                                                                                              | Institution | Location |
|------------------------|-------------------------------------------------------------------------------------------------------------------------------------------------------------------------------------------------------------------------------------------------------------------------------------------------------------------------------------------------------------------------------------------------------------------------------------------------------------------------------------------------------------------------------------------------------------------------------------------------------------------------------------------------------------------------------------------------------------------------------------------------------------------------------------------------------------------------------------------------------------------------------------------------------------------------------------------------------------------------------------------------------------------------------------------------------------------------------------------------------------------------|-------------|----------|
|                        | <p>Hanah Woods, Helina Misikir, Howard Klausner, Janay Scott, Jessica Heinonen, John Zervos, Joseph Miller, Kate Zenlea, Kristin Eis, Marissa Vasquez, Maurice Slaughter, Meaghan Flynn, Michael Garcia, Michelle Sankah, Nina Paeilli, Philip Benson, Robert Devore, Stevanya Baho, Tony Eljallad, Tyler Prentiss, Yaman Ahmed, Sharon Mathys, Linda Kaljee, Jeffrey Van Laere, Claudia Hanni, Hassan Zafar, Mona Desai, Gina Maki, Mary Perri, Dora Vager, Shannon Thomas, Autumn Robinson, Isis Hamilton, Sonia Eliya, Jehan Jazrawi, Biljana Popovic, Sharon Zahul, Joshua Ruzzin, John Laguio, Ali Mathena, Bobby Cook Jr., Marlene Hesler, Rochelle Fleming, Terria Minniefield, John Simons, Sherese Henderson, Ashley Hopkins, Rebecca McFarlane, Raeshell Carson, Jonathan Williams, Katherine Reyes, Erica Herc, Indira Brar, Mayur Ramesh, John McKinnon, Lacquis Duncan, Tim Asmar, Margaret Beyer, Kaleem Chaudhry, Madison Lee, Jo-Ann Rammal, Karthik Sridasyam, Siddesh Veer, Angelique Buluran, Kimberlyn Lott, Jeremiah Rooker, Alayna Wilder, Kathleen Wilson, Allison Weinmann, Hassan Mourtada</p> |             |          |

## **Supplementary Methods**

### **Trial oversight**

The trial Investigational New Drug sponsor, Moderna, Inc. was responsible for trial design (in collaboration with the Biomedical Advanced Research and Development Authority [BARDA], NIAID, Coronavirus Vaccine Prevention Network, and study co-chairs), site selection and monitoring, and data analysis. Investigators were responsible for data collection. Authors vouch for the accuracy and completeness of the data and the fidelity of the trial to the protocol.

The issuance of the mRNA-1273 and BNT162b2 EUAs in December 2020 and the prioritization of older persons, first responders and those with comorbidities in the general population to receive the mRNA vaccines prompted the rapid redesign of the COVE study to successfully maintain participant engagement for the planned duration of 2 years in an open-label design, thus enabling the evaluation of longer-term safety and waning efficacy using established and novel study methods, such as evaluating VE in those vaccinated early as well as late in the study population. It is also important to determine correlates of protection in these ongoing studies which could inform strategies to improve vaccine responses in immunocompromised patients and potentially diminish viral evolution and reservoirs of virus in the community.

### **Statistical methods for primary and secondary efficacy analyses**

The sample size of the study was driven by the total number of cases to demonstrate VE (mRNA-1273 vs. placebo) to prevent Covid-19. For the analysis of the primary efficacy end point, the trial was designed for the null hypothesis that the efficacy of the mRNA-1273 vaccine would be 30% or less, and a total of 151 cases of Covid-19 would provide 90% power to detect a 60% reduction in the hazard rate (i.e., 60% vaccine efficacy), with two planned interim analyses at approximately 35% and 70% of the target cases, and with a one-sided O'Brien–Fleming boundary for efficacy and an overall one-sided error rate of 0.025.

A sequential/hierarchical testing procedure was planned to control type 1 error rate over the primary efficacy and secondary efficacy endpoints. Secondary efficacy endpoints were only to be tested when the primary efficacy endpoint achieved statistical significance. Multiplicity adjustments were performed for secondary efficacy endpoints. (See Fixed-Sequence Method in the FDA guidance document at:

<https://www.fda.gov/files/drugs/published/Multiple-Endpoints-in-Clinical-Trials-Guidance-for-Industry.pdf>). Although the above testing strategy for select secondary efficacy endpoints was pre-specified in the statistical analysis plan (SAP), at the first interim analysis (IA1), with 95 adjudicated cases based on a data snapshot on 11-Nov-2020 (results reported in Baden et al, N Engl J Med 2021;384:403-16; online Dec 2020), the VE was demonstrated for the primary efficacy endpoint, Covid-19. At the time of IA1, there were not enough severe cases (only a total 11 severe Covid-19 cases) and infection data were not available, thus, the testing strategy of these secondary efficacy endpoints was not fully implemented. In this manuscript, more comprehensive efficacy results with longer follow-up and high efficacy observed across endpoints are reported.

Efficacy analyses the primary and secondary end points were performed using the per-protocol, mITT and full analysis set populations, and participants were assessed in their assigned randomized treatment groups for all efficacy analyses. In this protocol, the primary efficacy analysis was conducted in the per-protocol (PP) set. The PP set is a commonly used and regulatory-accepted analysis set for

primary efficacy evaluations in vaccine studies. In this study, the PP set consists of all participants with negative SARS-CoV-2 status at baseline, receiving the correct 2 doses within allowable dosing windows and having no major protocol deviations. The primary efficacy endpoint is based on Covid-19 cases counted starting 14 days after the second dose, at a time when the immune response to vaccine is expected to reach a high level that is protective against Covid-19. Using the PP set (eg rather than an intent-to-treat [ITT] dataset) for the primary efficacy analysis, affords a more accurate assessment of the protective effect against Covid-19 generated by the immune response to the scheduled two doses of vaccine. The efficacy analyses were also performed in the mITT set as supportive data.

### **Secondary end point definitions and derivations**

The analysis approach for primary and secondary efficacy endpoints are summarized in Table S4.

### **VE to prevent serologically confirmed SARS-CoV-2 infection or Covid-19 regardless of symptomatology or severity**

For the secondary efficacy end point, serologically confirmed SARS-CoV-2 infection or Covid-19 regardless of symptomatology or severity [COV-INF], any post-baseline positive RT-PCR results were considered, including those from the scheduled NP swab tests at Day 29 visit prior to the 2nd injection as well as the those prompted by symptom(s). In addition, seroconversion due to infection was considered. The analysis population for COV-INF was the PP and the mITT set that include participants with negative SARS-CoV-2 status at baseline. Seroconversion due to infection was defined for participants with negative SARS-CoV-2 status at baseline as becoming seropositive (positive bAb specific to SARS-CoV-2 NP) as measured by *Roche Elecsys* on study (at scheduled visits post baseline). A Covid-19 case or secondary definition of Covid-19 case was always an INF case. The date of documented infection regardless of symptom [COV-INF] was the earlier of the date of positive post-baseline RT-PCR result, or date of seroconversion due to infection.

In the primary approach, documented infection was counted starting 14 days after the 2nd injection, which required a positive RT-PCR result starting 14 days after the 2nd injection, or seroconversion at day 57 visit or later.

### **VE to prevent asymptomatic SARS-CoV-2 infection**

Asymptomatic SARS-CoV-2 infection was analyzed in the PP and mITT sets. Asymptomatic infection was identified by absence of symptoms and infections as detected by RT-PCR or seroconversion. Specifically, the absence of symptoms (no Covid-19 symptom for either primary efficacy end point of Covid-19, or secondary definition of Covid-19), and at least either seroconversion (bAb specific to SARS-CoV-2 nucleocapsid) at scheduled visits (months 1, 2, 7, 13 and 25 if applicable in Part A, participant decision visit and etc. in Part B) when blood samples for immunogenicity were collected, or by RT-PCR at scheduled visits such as pre-dose 2 at Day 29 in Part A, both RT-PCR test and bAb against SARS-CoV-2 nucleocapsid were considered.

The date of documented asymptomatic infection was the earlier date of seroconversion due to infection, or positive RT-PCR at scheduled visits, with absence of symptoms. Participants who had a symptomatic infection (Covid-19 or secondary definition of Covid-19) prior to an asymptomatic infection were censored at the time of symptomatic infection for the analysis of asymptomatic infection. In the primary approach, documented asymptomatic infection was counted starting 14 days after the 2nd injection, which required seroconversion at months 2 (day 57 visit) or later. As diseased cases (Covid-19 or secondary definition of Covid-19) are competing events for asymptomatic SARS-CoV-2 infections, competing risk method was used to estimate the vaccine efficacy of mRNA-1273,

specifically, Fine and Gray's (FG) sub-distribution hazard model will be used. Competing risk method was also be used to estimate the cumulative incidence function and the cumulative incidence of asymptomatic SARS-CoV-2 infections will be plotted.

#### **VE to prevent Covid-19 disease regardless of prior SARS-CoV-2 infection**

This endpoint was analyzed based on the FAS. The same methods described above for the primary efficacy end point were applied with cases counted starting 14 days after the second injection. Sensitivity analyses with cases counted starting immediately after the second injection, 14 days after the first injection, and after randomization were also be performed. In sensitivity analysis with cases counted starting after the second injection, participants who received only the first injection and was a case were censored at the time of Covid-19. The VE was also estimated with 1- ratio of incidence rates with the 95% CI using the exact method conditional upon the total number of cases adjusting for person-time. In addition, an exploratory analysis with the same Cox model was carried out in the subgroup of FAS whose baseline SARS-CoV-2 status was positive with cases counted starting from randomization to assess the VE in those with positive baseline SARS-CoV-2 status, at baseline, if sample size permitted. Such analysis in the subgroup of FAS whose baseline SARS-CoV-2 status was negative with cases counted starting from randomization was the same as the sensitivity analysis of Covid-19 starting from randomization in the mITT set.

#### **VE to prevent SARS-CoV-2 infection**

This endpoint will be analyzed using the FAS. The same methods described above for the primary efficacy endpoint will be applied with cases counted starting 14 days after the second injection of IP. Sensitivity analyses with cases counted starting immediately after the second injection, 14 days after the first injection, and after randomization will also be performed. In sensitivity analysis with cases counted starting after the second injection, participants who received only the first injection and is a case will be censored at the time of Covid-19. The VE will also be estimated with 1- ratio of incidence rates with the 95% CI using the exact method conditional upon the total number of cases adjusting for person-time. In addition, an exploratory analysis with the same Cox model will be carried out in the subgroup of FAS whose baseline SARS-CoV-2 status is positive with cases counted starting from randomization to assess the VE in those with positive baseline SARS-CoV-2 status, at baseline, if sample size permits. Such analysis in the subgroup of FAS whose baseline SARS-CoV-2 status is negative with cases counted starting from randomization is the same as the sensitivity analysis of Covid-19 starting from randomization in mITT.

**Figure S1. Study Flow Diagram of Part A (blinded phase) followed by Part B (open-label phase)**

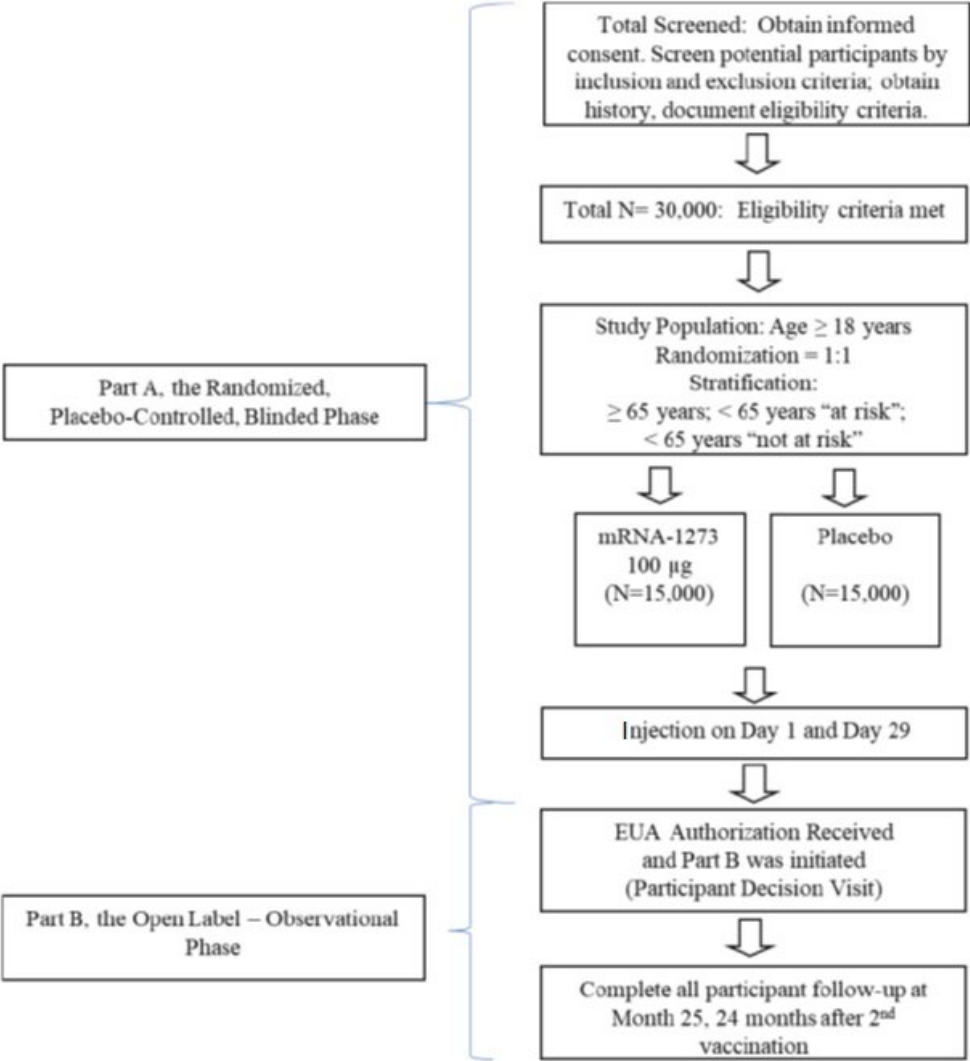

**Figure S1. Study Flow Diagram of Part A (blinded phase) followed by Part B (open-label phase).** EUA = Emergency Use Authorization. The ongoing 2-part Phase 3 study: Part A and Part B. Participants in Part A, the randomized, placebo-controlled, blinded phase of this study, were blinded to their treatment assignment. Given that the primary efficacy endpoint for mRNA-1273 against Covid-19 was met per the protocol-defined interim analysis (IA), Part B, the Open-Label Observational Phase of this study, was designed to offer participants who received placebo in Part A of this study and who met EUA eligibility, an option to request open-label mRNA-1273 during a Participant Decision Visit.

**Figure. S2. Trial Profile during Blinded Part (A)**

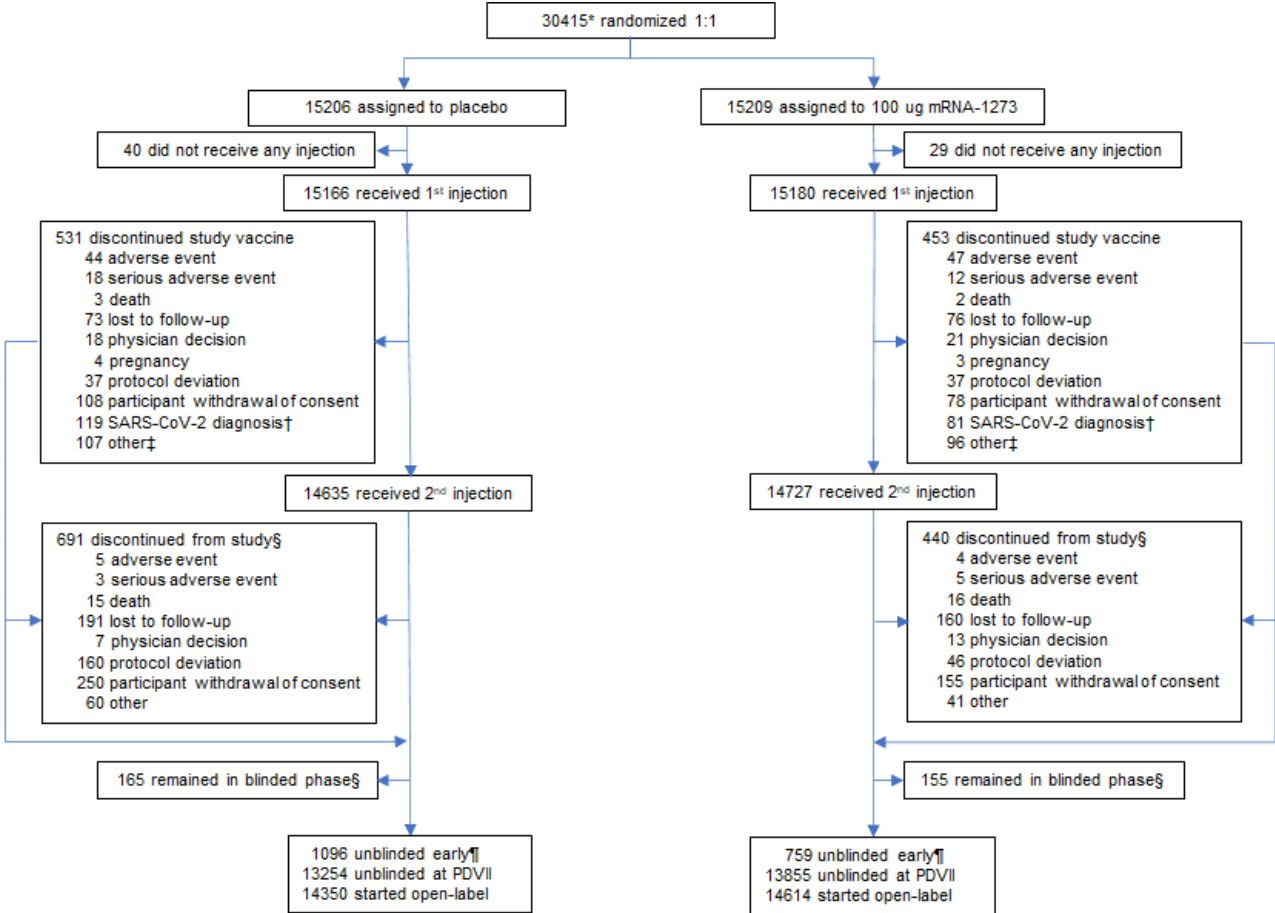

**Figure S2. Trial profile during Blinded Part (A).** In all groups, participants were evaluated according to the treatment group assigned. \*8 participants were excluded from the original randomization set (n=30,423) and all analyses sets including 6 participants with major protocol deviations and 2 who were randomized twice. †Diagnosis of Covid-19 by detection of SARS-CoV-2 in day 1 nasopharyngeal swab or Covid-19 diagnosed prior to day 29. ‡Other includes 3 participants in the placebo and 2 in the mRNA-1273 groups who discontinued study vaccine on the first dose date and also discontinued from the study. §Includes participants who received only one injection and both injections. ¶Early unblinding included those that occurred before Dec. 29, 2020, the date of implementation of the protocol amendment at sites to offer participants unblinding at the participant decision visit (PDV) and open-label vaccination. ¶¶Unblinded on or after Dec. 29, 2020, the date of implementation of the protocol amendment at sites. Data cutoff date: March 26, 2021.

**Figure S3. Discontinuation from Study by Month (Randomization Set)**

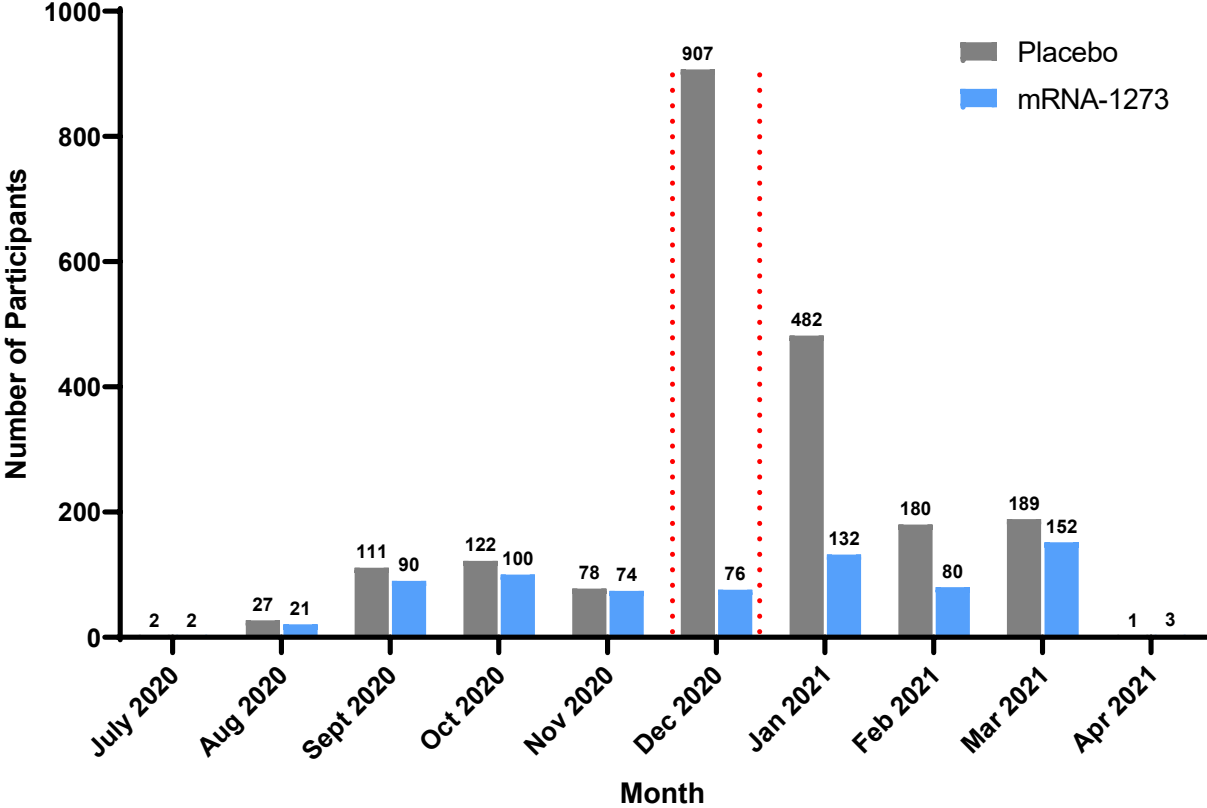

**Figure S3. Discontinuation from Study by Month (Randomization Set.** Number of participants who discontinued the study by month from July 2020 through April 2021. Data cutoff date: March 26, 2021.



**Figure S4. Solicited Injection-site and Systemic Adverse Events and Grades in Overall and Age Groups**

**A. Overall**

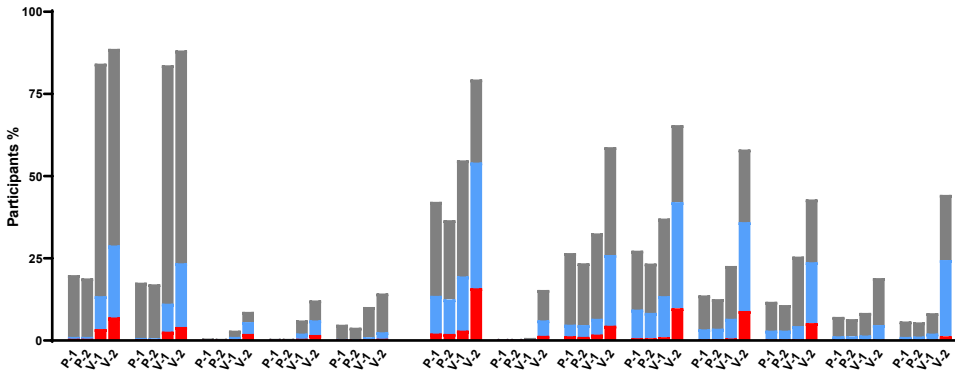

**B. 18-<65 yrs**

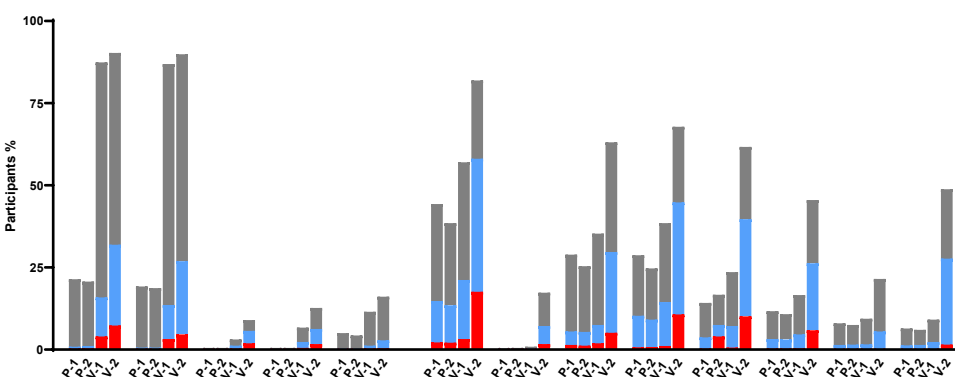

**C. ≥65 yrs**

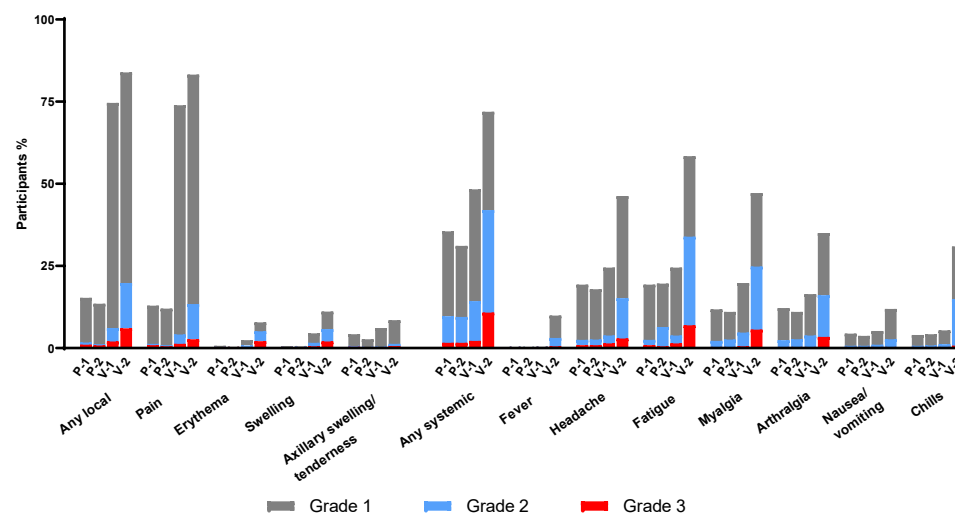

**Figure S4. Solicited local and systemic adverse events in age groups.** Percentage of participants in overall study (A), and those 18-<65 yrs (B) and ≥65 yrs (C) who experienced solicited local and systemic adverse events within 7 days post-injections 1 and 2 in the solicited safety set. P-1 and P-2 = placebo injections 1 and 2. V-1 and V-2 = mRNA-1273 vaccine injections 1 and 2. Data cutoff: March 26, 2021.

**Figure S5. Covid-19 Starting after Randomization by Time Period in Per-protocol Set**

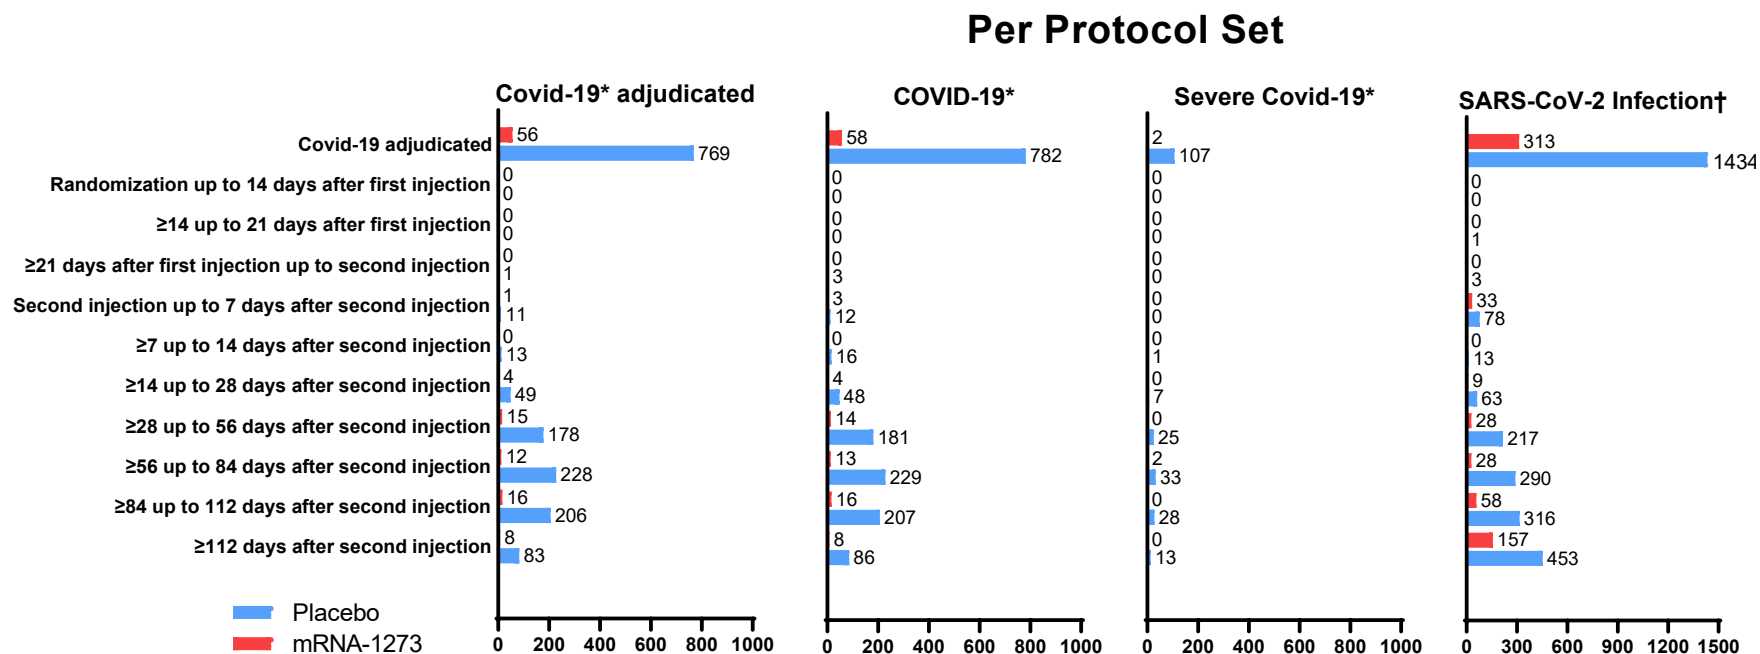

**Figure S5. Covid-19 Starting after Randomization by Time Period in Per-protocol Set.** \*With censoring rules for with the censoring rules for efficacy analyses. Covid-19 case is based on eligible symptoms and positive RT-PCR within 14 days. If a participant had a positive RT-PCR at pre-dose 2 visit (day 29) without eligible symptoms with 14 days, or positive Elecsys at scheduled visits prior to becoming a Covid-19 case, the participant was censored at the date with positive RT-PCR or Elecsys. †Includes participant decision visit data. Data-cutoff date: March 26, 2021.

**Table S1. Criteria for Covid-19 Case Definition**

| Covid-19 Case                     | Criteria                                                                                                                                                                                                                                                                                                                                                                                                                                                                                                                                                                                                                                                                                                                                                                                                                                                                                                                                                                      |
|-----------------------------------|-------------------------------------------------------------------------------------------------------------------------------------------------------------------------------------------------------------------------------------------------------------------------------------------------------------------------------------------------------------------------------------------------------------------------------------------------------------------------------------------------------------------------------------------------------------------------------------------------------------------------------------------------------------------------------------------------------------------------------------------------------------------------------------------------------------------------------------------------------------------------------------------------------------------------------------------------------------------------------|
| Primary Efficacy                  | <ul style="list-style-type: none"> <li>• At least TWO of the following systemic symptoms: Fever (<math>\geq 38^{\circ}\text{C}</math>), chills, myalgia, headache, sore throat, new olfactory and taste disorder(s),<br/>OR</li> <li>• At least ONE of the following respiratory signs/symptoms: cough, shortness of breath or difficulty breathing, OR clinical or radiographical evidence of pneumonia;<br/>AND</li> <li>• At least one NP swab, nasal swab, or saliva sample (or respiratory sample, if hospitalized) positive for SARS-CoV-2 by RT-PCR.</li> </ul>                                                                                                                                                                                                                                                                                                                                                                                                        |
| Severe                            | <ul style="list-style-type: none"> <li>• Confirmed Covid-19 per Primary Efficacy End point case definition, plus any of the following:               <ul style="list-style-type: none"> <li>▪ Clinical signs indicative of severe systemic illness, respiratory rate <math>\geq 30</math> per minute, Heart Rate <math>\geq 125</math> beats per minute, SpO<sub>2</sub> <math>\leq 93\%</math> on room air at sea level or PaO<sub>2</sub>/FIO<sub>2</sub> <math>&lt; 300</math> mm Hg, OR</li> <li>▪ Respiratory failure or Acute Respiratory Distress Syndrome (ARDS), (defined as needing high-flow oxygen, non-invasive or mechanical ventilation, or ECMO), evidence of shock (systolic blood pressure <math>&lt; 90</math> mmHg, diastolic BP <math>&lt; 60</math> mmHg or requiring vasopressors)<br/>OR</li> <li>▪ Significant acute renal, hepatic or neurologic dysfunction<br/>OR</li> <li>▪ Admission to an intensive care unit or death.</li> </ul> </li> </ul> |
| SARS-CoV-2 infection              | <p>SARS-CoV-2 infection was evaluated in participants with baseline negative SARS-CoV-2 status at baseline and cases defined by post-baseline</p> <ul style="list-style-type: none"> <li>▪ Positive RT-PCR results either at scheduled day 29 visit or prompted by symptoms<br/>OR</li> <li>▪ Becoming seropositive (positive bAb specific to SARS-CoV-2 NP) as measured by Roche Elecsys on study (at scheduled visits)</li> <li>▪ Symptomatic Covid-19 cases (Covid-19 case or secondary definition of Covid-19 case) always considered an infection case</li> </ul>                                                                                                                                                                                                                                                                                                                                                                                                        |
| Asymptomatic SARS-CoV-2 infection | <ul style="list-style-type: none"> <li>• Asymptomatic infection is identified by absence of symptoms and infections as detected by RT-PCR or seroconversion. Specifically:               <ul style="list-style-type: none"> <li>▪ Absence of symptoms (no Covid-19 symptom for either primary efficacy endpoint of Covid-19, or secondary definition of Covid-19),</li> <li>▪ AND at least one from below:                   <ul style="list-style-type: none"> <li>• Becoming seropositive (bAb specific to SARS-CoV-2 nucleocapsid, Roche Elecsys) at scheduled visits (months 1, 2, 7, 13 and 25 if applicable in Part A, Participant Decision Visit and etc. in Part B), when blood samples for immunogenicity are collected, or</li> <li>• By RT-PCR at scheduled visits such as pre-dose 2 at day 29 in Part A, both RT-PCR test and bAb against SARS-CoV-2 nucleocapsid will be considered.</li> </ul> </li> </ul> </li> </ul>                                         |

**Table S2. Grading of Covid-19 Symptoms**

| <b>Grading</b> | <b>All Symptoms</b>                                                         | <b>For Nausea/Vomiting ONLY</b>                            | <b>For Sense of Smell/Taste ONLY</b>               |
|----------------|-----------------------------------------------------------------------------|------------------------------------------------------------|----------------------------------------------------|
| None           | No symptom                                                                  |                                                            |                                                    |
| Mild           | I had the symptom, but I could still do my normal activities                | I was able to eat and drink normally                       | I had the symptom, but I retained some taste/smell |
| Moderate       | The symptom really bothered me. It was hard to do my normal activities      | It bothered me enough that I did not eat or drink normally | My taste/smell was significantly affected          |
| Severe         | The symptom was very bad. I was not able to do activities that I usually do | I could not eat or drink                                   | I have no taste or smell                           |

**Table S3. Description of Analysis populations**

| <b>Population</b>                   | <b>Description</b>                                                                                                                                                                                                                                                                                                                                  |
|-------------------------------------|-----------------------------------------------------------------------------------------------------------------------------------------------------------------------------------------------------------------------------------------------------------------------------------------------------------------------------------------------------|
| Randomization Set                   | All participants who are randomized, regardless of the participants' treatment status in the study.                                                                                                                                                                                                                                                 |
| Full Analysis Set (FAS)             | All randomized participants who received at least one dose of placebo or vaccine.<br>Participants will be analyzed according to the group to which they were randomized.                                                                                                                                                                            |
| Modified Intent-to-Treat (mITT) Set | All participants in the FAS who had no immunologic or virologic evidence of prior Covid-19 (ie, negative NP swab test at Day 1, and/or bAb against SARS-CoV-2 nucleocapsid below LOD or LLOQ) at Day 1 before the first dose of placebo or vaccine.<br>Participants will be analyzed according to the group to which they were randomized.          |
| Per-protocol (PP) Set               | All participants in the mITT Set who received planned doses of placebo or vaccine per schedule and have no major protocol deviations, as determined and documented by Sponsor prior to database lock and unblinding, that impact critical or key study data.<br>Participants will be analyzed according to the group to which they were randomized. |
| Solicited Safety Set                | The Solicited Safety Set consists of all randomized participants who received at least one dose of placebo or vaccine and contributed any solicited AE data.<br>The Solicited Safety Set will be used for the analyses of solicited AEs and participants will be included in the group corresponding to the treatment that they actually received.  |
| Safety Set                          | All randomized participants who received at least one dose of placebo or vaccine. The Safety Set will be used for all analyses of safety except for the solicited AEs.<br>Participants will be included in the group corresponding to the treatment that they actually received.                                                                    |

**Table S4. Statistical Analysis Methods for Efficacy End points**

| End point                                                                                                                                                                                                                                                                                                                                                                                                                                                                                                                                                                                                                                               | Statistical Analysis Methods                                                                                                                                                                                                                                                                                                                                                                                                                                                                                                                                                                                                                                                                                                                                                                                                                                                                                                                                                                                                                                                           |
|---------------------------------------------------------------------------------------------------------------------------------------------------------------------------------------------------------------------------------------------------------------------------------------------------------------------------------------------------------------------------------------------------------------------------------------------------------------------------------------------------------------------------------------------------------------------------------------------------------------------------------------------------------|----------------------------------------------------------------------------------------------------------------------------------------------------------------------------------------------------------------------------------------------------------------------------------------------------------------------------------------------------------------------------------------------------------------------------------------------------------------------------------------------------------------------------------------------------------------------------------------------------------------------------------------------------------------------------------------------------------------------------------------------------------------------------------------------------------------------------------------------------------------------------------------------------------------------------------------------------------------------------------------------------------------------------------------------------------------------------------------|
| <p><b>Primary end point:</b></p> <ul style="list-style-type: none"> <li>Vaccine Efficacy (VE) of mRNA-1273 to prevent Covid-19</li> </ul>                                                                                                                                                                                                                                                                                                                                                                                                                                                                                                               | <ul style="list-style-type: none"> <li>Primary analysis: VE will be estimated with 1 - HR (mRNA-1273 vs placebo) using a Cox proportional hazard regression model with treatment group as a fixed effect and adjusted for stratification factor based on the PP Set, with cases counted starting 14 days after the second injection</li> <li>Analysis using the same model based on the mITT Set.</li> <li>Sensitivity analysis using the same model based on the PP Set, with cases counted starting either immediately after the second injection or immediately after the first injection</li> <li>Subgroup analysis of the primary efficacy end point will be performed to assess consistency of VE, such as in the age groups <math>\geq 18</math> and <math>&lt; 65</math> years and <math>\geq 65</math> years</li> <li>Supportive analysis of VE to be estimated with 1 - ratio of incidence rates with 95% CI using the exact method conditional upon the total number of cases</li> <li>Supportive analysis of VE to be estimated with cumulative incidence ratio</li> </ul> |
| <p><b>Secondary end points:</b></p> <ul style="list-style-type: none"> <li>Vaccine efficacy of mRNA-1273 to prevent severe Covid-19</li> <li>Vaccine efficacy of mRNA-1273 to prevent serologically confirmed SARS-CoV-2 infection or Covid-19 regardless of symptomatology or severity</li> <li>Vaccine efficacy of mRNA-1273 to prevent Covid-19 using a secondary definition of symptoms</li> <li>Vaccine efficacy of mRNA-1273 to prevent death due to Covid-19</li> <li>Vaccine efficacy of mRNA-1273 to prevent Covid-19 after the first injection</li> <li>Vaccine efficacy of mRNA-1273 to prevent asymptomatic SARS-CoV-2 infection</li> </ul> | <ul style="list-style-type: none"> <li>Similar analysis method as for the primary end point analysis. For each of the secondary end points: <ul style="list-style-type: none"> <li>Primary analysis: VE will be estimated with 1 - HR (mRNA-1273 vs placebo) using a Cox proportional hazard regression model with treatment group as a fixed effect and adjusting for stratification factor based on the PP Set, with cases counted starting 14 days after the second injection</li> <li>Analysis using the same model based on the mITT Set.</li> <li>Sensitivity analyses with cases counted starting immediately after the second injection, 14 days after the first injection, immediately after the first injection, and immediately after randomization.</li> </ul> </li> <li>Vaccine efficacy and 95% CI based on the case incidence will be estimated with 1 - ratio of incidence rates using the exact method conditional upon the total number of cases.</li> </ul>                                                                                                         |
| <ul style="list-style-type: none"> <li>Vaccine efficacy of mRNA-1273 to prevent Covid-19 in all study participants, regardless of evidence of prior SARS-CoV-2 infection</li> </ul>                                                                                                                                                                                                                                                                                                                                                                                                                                                                     | <p>The FAS population will be used for this secondary objective, using similar analysis methods as for the primary end point analysis.</p> <ul style="list-style-type: none"> <li>Primary analysis: VE will be estimated with 1 - HR (mRNA-1273 vs placebo) using a Cox proportional hazard regression model with treatment group as a fixed effect and adjusting for stratification factor based on the FAS, with cases counted starting 14 days after the second injection.</li> </ul> <p>Sensitivity analyses with cases counted starting immediately after the second injection, 14 days after the first injection, immediately after the first injection, and immediately after randomization.</p>                                                                                                                                                                                                                                                                                                                                                                                |

**Table S5. Demographics and Characteristics of Population**  
**A. Overall Full-Analysis Population**

| Characteristics n (%)                                                                                                                                                                                                                                                                                                                                                                                                                                                                                                                                                                                                                                                                                                                                                                                                                                                                                                                                                                                                                                                                                         | Placebo<br>N=15166 | mRNA-1273<br>N=15180 | Total<br>N=30346 |
|---------------------------------------------------------------------------------------------------------------------------------------------------------------------------------------------------------------------------------------------------------------------------------------------------------------------------------------------------------------------------------------------------------------------------------------------------------------------------------------------------------------------------------------------------------------------------------------------------------------------------------------------------------------------------------------------------------------------------------------------------------------------------------------------------------------------------------------------------------------------------------------------------------------------------------------------------------------------------------------------------------------------------------------------------------------------------------------------------------------|--------------------|----------------------|------------------|
| Sex                                                                                                                                                                                                                                                                                                                                                                                                                                                                                                                                                                                                                                                                                                                                                                                                                                                                                                                                                                                                                                                                                                           |                    |                      |                  |
| Male                                                                                                                                                                                                                                                                                                                                                                                                                                                                                                                                                                                                                                                                                                                                                                                                                                                                                                                                                                                                                                                                                                          | 8057 (53.1)        | 7917 (52.2)          | 15974 (52.6)     |
| Female                                                                                                                                                                                                                                                                                                                                                                                                                                                                                                                                                                                                                                                                                                                                                                                                                                                                                                                                                                                                                                                                                                        | 7109 (46.9)        | 7263 (42.8)          | 14372 (47.4)     |
| Age at Screening (yr)                                                                                                                                                                                                                                                                                                                                                                                                                                                                                                                                                                                                                                                                                                                                                                                                                                                                                                                                                                                                                                                                                         |                    |                      |                  |
| Mean (range)                                                                                                                                                                                                                                                                                                                                                                                                                                                                                                                                                                                                                                                                                                                                                                                                                                                                                                                                                                                                                                                                                                  | 51.3 (18-95)       | 51.4 (18-95)         | 51.4 (18-95)     |
| Age (yr) and health risk for severe Covid-19*                                                                                                                                                                                                                                                                                                                                                                                                                                                                                                                                                                                                                                                                                                                                                                                                                                                                                                                                                                                                                                                                 |                    |                      |                  |
| ≥18 and <65 and Not at Risk                                                                                                                                                                                                                                                                                                                                                                                                                                                                                                                                                                                                                                                                                                                                                                                                                                                                                                                                                                                                                                                                                   | 8882 (58.6)        | 8888 (58.6)          | 17770 (58.6)     |
| ≥18 and <65 and at Risk                                                                                                                                                                                                                                                                                                                                                                                                                                                                                                                                                                                                                                                                                                                                                                                                                                                                                                                                                                                                                                                                                       | 2535 (16.7)        | 2530 (16.7)          | 5065 (16.7)      |
| ≥65                                                                                                                                                                                                                                                                                                                                                                                                                                                                                                                                                                                                                                                                                                                                                                                                                                                                                                                                                                                                                                                                                                           | 3749 (24.7)        | 3762 (24.8)          | 7511 (24.8)      |
| Ethnicity                                                                                                                                                                                                                                                                                                                                                                                                                                                                                                                                                                                                                                                                                                                                                                                                                                                                                                                                                                                                                                                                                                     |                    |                      |                  |
| Hispanic or Latino                                                                                                                                                                                                                                                                                                                                                                                                                                                                                                                                                                                                                                                                                                                                                                                                                                                                                                                                                                                                                                                                                            | 3109 (20.5)        | 3121 (20.6)          | 6230 (20.5)      |
| Not Hispanic or Latino                                                                                                                                                                                                                                                                                                                                                                                                                                                                                                                                                                                                                                                                                                                                                                                                                                                                                                                                                                                                                                                                                        | 11921 (78.6)       | 11917 (78.5)         | 23838 (78.6)     |
| Not reported or unknown                                                                                                                                                                                                                                                                                                                                                                                                                                                                                                                                                                                                                                                                                                                                                                                                                                                                                                                                                                                                                                                                                       | 136 (0.9)          | 142 (0.9)            | 278 (0.9)        |
| Race‡                                                                                                                                                                                                                                                                                                                                                                                                                                                                                                                                                                                                                                                                                                                                                                                                                                                                                                                                                                                                                                                                                                         |                    |                      |                  |
| White                                                                                                                                                                                                                                                                                                                                                                                                                                                                                                                                                                                                                                                                                                                                                                                                                                                                                                                                                                                                                                                                                                         | 12001 (79.1)       | 12031 (79.3)         | 24032 (79.2)     |
| Black or African American                                                                                                                                                                                                                                                                                                                                                                                                                                                                                                                                                                                                                                                                                                                                                                                                                                                                                                                                                                                                                                                                                     | 1531 (10.1)        | 1567 (10.3)          | 3098 (10.2)      |
| Asian                                                                                                                                                                                                                                                                                                                                                                                                                                                                                                                                                                                                                                                                                                                                                                                                                                                                                                                                                                                                                                                                                                         | 739 (4.9)          | 656 (4.3)            | 1395 (4.6)       |
| American Indian or Alaska Native                                                                                                                                                                                                                                                                                                                                                                                                                                                                                                                                                                                                                                                                                                                                                                                                                                                                                                                                                                                                                                                                              | 121 (0.8)          | 113 (0.7)            | 234 (0.8)        |
| Native Hawaiian or Other Pacific Islander                                                                                                                                                                                                                                                                                                                                                                                                                                                                                                                                                                                                                                                                                                                                                                                                                                                                                                                                                                                                                                                                     | 32 (0.2)           | 36 (0.2)             | 68 (0.2)         |
| Multiracial                                                                                                                                                                                                                                                                                                                                                                                                                                                                                                                                                                                                                                                                                                                                                                                                                                                                                                                                                                                                                                                                                                   | 319 (2.1)          | 319 (2.1)            | 638 (2.1)        |
| Other                                                                                                                                                                                                                                                                                                                                                                                                                                                                                                                                                                                                                                                                                                                                                                                                                                                                                                                                                                                                                                                                                                         | 294 (1.9)          | 299 (2.0)            | 593 (2.0)        |
| Not reported or unknown                                                                                                                                                                                                                                                                                                                                                                                                                                                                                                                                                                                                                                                                                                                                                                                                                                                                                                                                                                                                                                                                                       | 129 (0.9)          | 159 (1.0)            | 288 (0.9)        |
| Baseline SARS-CoV-2 Status†                                                                                                                                                                                                                                                                                                                                                                                                                                                                                                                                                                                                                                                                                                                                                                                                                                                                                                                                                                                                                                                                                   |                    |                      |                  |
| Negative                                                                                                                                                                                                                                                                                                                                                                                                                                                                                                                                                                                                                                                                                                                                                                                                                                                                                                                                                                                                                                                                                                      | 14745 (97.2)       | 14746 (97.1)         | 29491 (97.2)     |
| Positive                                                                                                                                                                                                                                                                                                                                                                                                                                                                                                                                                                                                                                                                                                                                                                                                                                                                                                                                                                                                                                                                                                      | 337 (2.2)          | 347 (2.3)            | 684 (2.3)        |
| Missing                                                                                                                                                                                                                                                                                                                                                                                                                                                                                                                                                                                                                                                                                                                                                                                                                                                                                                                                                                                                                                                                                                       | 84 (0.6)           | 87 (0.6)             | 171 (0.6)        |
| Baseline RT-PCR Results                                                                                                                                                                                                                                                                                                                                                                                                                                                                                                                                                                                                                                                                                                                                                                                                                                                                                                                                                                                                                                                                                       |                    |                      |                  |
| Negative                                                                                                                                                                                                                                                                                                                                                                                                                                                                                                                                                                                                                                                                                                                                                                                                                                                                                                                                                                                                                                                                                                      | 14995 (98.9)       | 15013 (98.9)         | 30008 (98.9)     |
| Positive                                                                                                                                                                                                                                                                                                                                                                                                                                                                                                                                                                                                                                                                                                                                                                                                                                                                                                                                                                                                                                                                                                      | 95 (0.6)           | 88 (0.6)             | 183 (0.6)        |
| Missing                                                                                                                                                                                                                                                                                                                                                                                                                                                                                                                                                                                                                                                                                                                                                                                                                                                                                                                                                                                                                                                                                                       | 76 (0.5)           | 79 (0.5)             | 155 (0.5)        |
| Baseline bAb Anti-SARS-CoV-2                                                                                                                                                                                                                                                                                                                                                                                                                                                                                                                                                                                                                                                                                                                                                                                                                                                                                                                                                                                                                                                                                  |                    |                      |                  |
| Negative                                                                                                                                                                                                                                                                                                                                                                                                                                                                                                                                                                                                                                                                                                                                                                                                                                                                                                                                                                                                                                                                                                      | 14844 (97.9)       | 14847 (97.8)         | 29691 (97.8)     |
| Positive                                                                                                                                                                                                                                                                                                                                                                                                                                                                                                                                                                                                                                                                                                                                                                                                                                                                                                                                                                                                                                                                                                      | 303 (2.0)          | 309 (2.0)            | 612 (2.0)        |
| Missing                                                                                                                                                                                                                                                                                                                                                                                                                                                                                                                                                                                                                                                                                                                                                                                                                                                                                                                                                                                                                                                                                                       | 19 (0.1)           | 24 (0.2)             | 43 (0.1)         |
| Risk Factor for Severe Covid-19 at Screening‡                                                                                                                                                                                                                                                                                                                                                                                                                                                                                                                                                                                                                                                                                                                                                                                                                                                                                                                                                                                                                                                                 |                    |                      |                  |
| Chronic lung disease                                                                                                                                                                                                                                                                                                                                                                                                                                                                                                                                                                                                                                                                                                                                                                                                                                                                                                                                                                                                                                                                                          | 749 (4.9)          | 712 (4.7)            | 1461 (4.8)       |
| Significant cardiac disease                                                                                                                                                                                                                                                                                                                                                                                                                                                                                                                                                                                                                                                                                                                                                                                                                                                                                                                                                                                                                                                                                   | 742 (4.9)          | 762 (5.0)            | 1504 (5.0)       |
| Severe obesity                                                                                                                                                                                                                                                                                                                                                                                                                                                                                                                                                                                                                                                                                                                                                                                                                                                                                                                                                                                                                                                                                                | 1058 (7.0)         | 1070 (7.0)           | 2128 (7.0)       |
| Diabetes                                                                                                                                                                                                                                                                                                                                                                                                                                                                                                                                                                                                                                                                                                                                                                                                                                                                                                                                                                                                                                                                                                      | 1457 (9.6)         | 1460 (9.6)           | 2917 (9.6)       |
| Liver disease                                                                                                                                                                                                                                                                                                                                                                                                                                                                                                                                                                                                                                                                                                                                                                                                                                                                                                                                                                                                                                                                                                 | 96 (0.6)           | 104 (0.7)            | 200 (0.7)        |
| HIV                                                                                                                                                                                                                                                                                                                                                                                                                                                                                                                                                                                                                                                                                                                                                                                                                                                                                                                                                                                                                                                                                                           | 91 (0.6)           | 94 (0.6)             | 185 (0.6)        |
| Body Mass Index, (kg/m <sup>2</sup> )                                                                                                                                                                                                                                                                                                                                                                                                                                                                                                                                                                                                                                                                                                                                                                                                                                                                                                                                                                                                                                                                         |                    |                      |                  |
| n                                                                                                                                                                                                                                                                                                                                                                                                                                                                                                                                                                                                                                                                                                                                                                                                                                                                                                                                                                                                                                                                                                             | 15081              | 15092                | 30173            |
| Mean (SD)                                                                                                                                                                                                                                                                                                                                                                                                                                                                                                                                                                                                                                                                                                                                                                                                                                                                                                                                                                                                                                                                                                     | 29.32 (6.7)        | 29.32 (6.8)          | 29.32 (6.8)      |
| bAb = binding antibody concentration; IRT = interactive response technology; RT-PCR = reverse transcription polymerase chain reaction. Internet-based randomization was used to randomize participants to treatment groups based on the information the Investigator entered regarding the age and potential comorbid conditions. Percentages based on the full analysis set (FAS).<br>*Based on stratification factor from IRT, participants who were <65 years old were categorized as at risk for severe Covid-19 illness if they had at least 1 of the risk factors specified in the study protocol at screening. †Baseline SARS-CoV-2 status was positive if there was immunologic or virologic evidence of prior Covid-19, defined as positive RT-PCR test, or bAb against SARS-CoV-2 nucleocapsid above limit of detection or lower limit of quantification at day 1. Negative was defined as negative RT-PCR test and negative bAb against SARS-CoV-2 assay result at day 1. ‡Participants could be under one or more categories and were counted once at each category. Data cutoff: March 26, 2021. |                    |                      |                  |

## B. Demographics and Characteristics by Age Group Stratification

| Characteristic n (%)                     | ≥18-<65 yr and not at risk |                     |                  | ≥18-<65 yr and at risk |                     |                 | ≥65 yr            |                     |                 | Overall            |                      |                  |
|------------------------------------------|----------------------------|---------------------|------------------|------------------------|---------------------|-----------------|-------------------|---------------------|-----------------|--------------------|----------------------|------------------|
|                                          | Placebo<br>N=8882          | mRNA-1273<br>N=8888 | Total<br>N=17770 | Placebo<br>N=2535      | mRNA-1273<br>N=2530 | Total<br>N=5065 | Placebo<br>N=3749 | mRNA-1273<br>N=3762 | Total<br>N=7511 | Placebo<br>N=15166 | mRNA-1273<br>N=15180 | Total<br>N=30346 |
| Age at screening, yr mean (range)        | 43.8 (18-72)               | 44.0 (18-64)        | 43.9 (18-72)     | 49.2 (18-79)           | 48.9 (18-76)        | 49.0 (18-79)    | 70.7 (40-95)      | 70.4 (64-95)        | 70.6 (40-95)    | 51.3 (18-95)       | 51.4 (18-95)         | 51.4 (18-95)     |
| Sex                                      |                            |                     |                  |                        |                     |                 |                   |                     |                 |                    |                      |                  |
| Male                                     | 4628 (52.1)                | 4541 (51.1)         | 9169 (51.6)      | 1329 (52.4)            | 1303 (51.5)         | 2632 (52.0)     | 2100 (56.0)       | 2073 (55.1)         | 4173 (55.6)     | 8057 (53.1)        | 7917 (52.2)          | 15974 (52.6)     |
| Female                                   | 4254 (47.9)                | 4347 (48.9)         | 8601 (48.4)      | 1206 (47.6)            | 1227 (48.5)         | 2433 (48.0)     | 1649 (44.0)       | 1689 (44.9)         | 3338 (44.4)     | 7109 (46.9)        | 7263 (47.8)          | 14372 (47.4)     |
| Race                                     |                            |                     |                  |                        |                     |                 |                   |                     |                 |                    |                      |                  |
| White                                    | 6790 (76.4)                | 6757 (76.0)         | 13547 (76.2)     | 1872 (73.8)            | 1900 (75.1)         | 3772 (74.5)     | 3339 (89.1)       | 3374 (89.7)         | 6713 (89.4)     | 12001 (79.1)       | 12031 (79.3)         | 24032 (79.2)     |
| Black or African American                | 901 (10.1)                 | 971 (10.9)          | 1872 (10.5)      | 414 (16.3)             | 374 (14.8)          | 788 (15.6)      | 216 (5.8)         | 222 (5.9)           | 438 (5.8)       | 1531 (10.1)        | 1567 (10.3)          | 3098 (10.2)      |
| Asian                                    | 579 (6.5)                  | 503 (5.7)           | 1082 (6.1)       | 83 (3.3)               | 87 (3.4)            | 170 (3.4)       | 77 (2.1)          | 66 (1.8)            | 143 (1.9)       | 739 (4.9)          | 656 (4.3)            | 1395 (4.6)       |
| American Indian or Alaska Native         | 72 (0.8)                   | 65 (0.7)            | 137 (0.8)        | 23 (0.9)               | 27 (1.1)            | 50 (1.0)        | 26 (0.7)          | 21 (0.6)            | 47 (0.6)        | 121 (0.8)          | 113 (0.7)            | 234 (0.8)        |
| Native Hawaiian or Pacific Islander      | 20 (0.2)                   | 26 (0.3)            | 46 (0.3)         | 9 (0.4)                | 7 (0.3)             | 16 (0.3)        | 3 (<0.1)          | 3 (<0.1)            | 6 (<0.1)        | 32 (0.2)           | 36 (0.2)             | 68 (0.2)         |
| Multiracial                              | 232 (2.6)                  | 236 (2.7)           | 468 (2.6)        | 52 (2.1)               | 51 (2.0)            | 103 (2.0)       | 35 (0.9)          | 32 (0.9)            | 67 (0.9)        | 319 (2.1)          | 319 (2.1)            | 638 (2.1)        |
| Other                                    | 211 (2.4)                  | 220 (2.5)           | 431 (2.4)        | 51 (2.0)               | 56 (2.2)            | 107 (2.1)       | 32 (0.9)          | 23 (0.6)            | 55 (0.7)        | 294 (1.9)          | 299 (2.0)            | 593 (2.0)        |
| Not reported                             | 42 (0.5)                   | 67 (0.8)            | 109 (0.6)        | 18 (0.7)               | 17 (0.7)            | 35 (0.7)        | 14 (0.4)          | 13 (0.3)            | 27 (0.4)        | 74 (0.5)           | 97 (0.6)             | 171 (0.6)        |
| Unknown                                  | 35 (0.4)                   | 43 (0.5)            | 78 (0.4)         | 13 (0.5)               | 11 (0.4)            | 24 (0.5)        | 7 (0.2)           | 8 (0.2)             | 15 (0.2)        | 55 (0.4)           | 62 (0.4)             | 117 (0.4)        |
| Race and Ethnicity Group*                |                            |                     |                  |                        |                     |                 |                   |                     |                 |                    |                      |                  |
| White                                    | 4978 (56.0)                | 5004 (56.3)         | 9982 (56.2)      | 1427 (56.3)            | 1458 (57.6)         | 2885 (57.0)     | 3063 (81.7)       | 3071 (81.6)         | 6134 (81.7)     | 9468 (62.4)        | 9533 (62.8)          | 19001 (62.6)     |
| Communities of color                     | 3896 (43.9)                | 3870 (43.5)         | 7766 (43.7)      | 1103 (43.5)            | 1066 (42.1)         | 2169 (42.8)     | 673 (18.0)        | 685 (18.2)          | 1358 (18.1)     | 5672 (37.4)        | 5621 (37.0)          | 11293 (37.2)     |
| Missing                                  | 8 (<0.1)                   | 14 (0.2)            | 22 (0.1)         | 5 (0.2)                | 6 (0.2)             | 11 (0.2)        | 13 (0.3)          | 6 (0.2)             | 19 (0.3)        | 26 (0.2)           | 26 (0.2)             | 52 (0.2)         |
| Ethnicity                                |                            |                     |                  |                        |                     |                 |                   |                     |                 |                    |                      |                  |
| Hispanic or Latino                       | 2222 (25.0)                | 2211 (24.9)         | 4433 (24.9)      | 553 (21.8)             | 557 (22.0)          | 1110 (21.9)     | 334 (8.9)         | 353 (9.4)           | 687 (9.1)       | 3109 (20.5)        | 3121 (20.6)          | 6230 (20.5)      |
| Not Hispanic or Latino                   | 6588 (74.2)                | 6597 (74.2)         | 13185 (74.2)     | 1959 (77.3)            | 1955 (77.3)         | 3914 (77.3)     | 3374 (90.0)       | 3365 (89.4)         | 6739 (89.7)     | 11921 (78.6)       | 11917 (78.5)         | 23838 (78.6)     |
| Not Reported                             | 42 (0.5)                   | 58 (0.7)            | 100 (0.6)        | 15 (0.6)               | 14 (0.6)            | 29 (0.6)        | 26 (0.7)          | 33 (0.9)            | 59 (0.8)        | 83 (0.5)           | 105 (0.7)            | 188 (0.6)        |
| Unknown                                  | 30 (0.3)                   | 22 (0.2)            | 52 (0.3)         | 8 (0.3)                | 4 (0.2)             | 12 (0.2)        | 15 (0.4)          | 11 (0.3)            | 26 (0.3)        | 53 (0.3)           | 37 (0.2)             | 90 (0.3)         |
| BMI kg/m2, mean (SD)                     | 28.0 (5.1)                 | 27.9 (5.3)          | 27.9 (5.2)       | 35.0 (9.1)             | 35.2 (9.5)          | 35.1 (9.3)      | 28.7 (5.9)        | 28.7 (5.8)          | 28.7 (5.9)      | 29.3 (6.7)         | 29.3 (6.8)           | 29.3 (6.8)       |
| At risk for Severe Covid-19 at Screening |                            |                     |                  |                        |                     |                 |                   |                     |                 |                    |                      |                  |



|                                              |              |              |              |             |             |             |             |             |             |              |              |              |
|----------------------------------------------|--------------|--------------|--------------|-------------|-------------|-------------|-------------|-------------|-------------|--------------|--------------|--------------|
| Yes                                          | 139 (1.6)    | 131 (1.5)    | 270 (1.5)    | 2185 (86.2) | 2192 (86.6) | 4377 (86.4) | 1133 (30.2) | 1125 (29.9) | 2258 (30.1) | 3457 (22.8)  | 3448 (22.7)  | 6905 (22.8)  |
| No                                           | 8743 (98.4)  | 8757 (98.5)  | 17500 (98.5) | 350 (13.8)  | 338 (13.4)  | 688 (13.6)  | 2616 (69.8) | 2637 (70.1) | 5253 (69.9) | 11709 (77.2) | 11732 (77.3) | 23441 (77.2) |
| Baseline RT-PCR                              |              |              |              |             |             |             |             |             |             |              |              |              |
| Negative                                     | 8785 (98.9)  | 8774 (98.7)  | 17559 (98.8) | 2490 (98.2) | 2499 (98.8) | 4989 (98.5) | 3720 (99.2) | 3740 (99.4) | 7460 (99.3) | 14995 (98.9) | 15013 (98.9) | 30008 (98.9) |
| Positive                                     | 65 (0.7)     | 65 (0.7)     | 130 (0.7)    | 20 (0.8)    | 16 (0.6)    | 36 (0.7)    | 10 (0.3)    | 7 (0.2)     | 17 (0.2)    | 95 (0.6)     | 88 (0.6)     | 183 (0.6)    |
| Missing                                      | 32 (0.4)     | 49 (0.6)     | 81 (0.5)     | 25 (1.0)    | 15 (0.6)    | 40 (0.8)    | 19 (0.5)    | 15 (0.4)    | 34 (0.5)    | 76 (0.5)     | 79 (0.5)     | 155 (0.5)    |
| Baseline bAb Anti-SARS-CoV-2                 |              |              |              |             |             |             |             |             |             |              |              |              |
| Negative                                     | 8660 (97.5)  | 8647 (97.3)  | 17307 (97.4) | 2468 (97.4) | 2482 (98.1) | 4950 (97.7) | 3716 (99.1) | 3718 (98.8) | 7434 (99.0) | 14844 (97.9) | 14847 (97.8) | 29691 (97.8) |
| Positive                                     | 213 (2.4)    | 233 (2.6)    | 446 (2.5)    | 61 (2.4)    | 43 (1.7)    | 104 (2.1)   | 29 (0.8)    | 33 (0.9)    | 62 (0.8)    | 303 (2.0)    | 309 (2.0)    | 612 (2.0)    |
| Missing                                      | 9 (0.1)      | 8 (<0.1)     | 17 (<0.1)    | 6 (0.2)     | 5 (0.2)     | 11 (0.2)    | 4 (0.1)     | 11 (0.3)    | 15 (0.2)    | 19 (0.1)     | 24 (0.2)     | 43 (0.1)     |
| Baseline SARS-CoV-2 Status†                  |              |              |              |             |             |             |             |             |             |              |              |              |
| Negative                                     | 8608 (96.9)  | 8575 (96.5)  | 17183 (96.7) | 2442 (96.3) | 2467 (97.5) | 4909 (96.9) | 3695 (98.6) | 3704 (98.5) | 7399 (98.5) | 14745 (97.2) | 14746 (97.1) | 29491 (97.2) |
| Positive                                     | 236 (2.7)    | 263 (3.0)    | 499 (2.8)    | 67 (2.6)    | 48 (1.9)    | 115 (2.3)   | 34 (0.9)    | 36 (1.0)    | 70 (0.9)    | 337 (2.2)    | 347 (2.3)    | 684 (2.3)    |
| Missing                                      | 38 (0.4)     | 50 (0.6)     | 88 (0.5)     | 26 (1.0)    | 15 (0.6)    | 41 (0.8)    | 20 (0.5)    | 22 (0.6)    | 42 (0.6)    | 84 (0.6)     | 87 (0.6)     | 171 (0.6)    |
| Age Subgroup at Screening, mean (SD), yr     |              |              |              |             |             |             |             |             |             |              |              |              |
| ≥18 and <65                                  | 43.8 (12.33) | 44.0 (12.40) | 43.9 (12.36) | 2532 (99.9) | 2524 (99.8) | 5056 (99.8) | 1 (<0.1)    | 1 (<0.1)    | 2 (<0.1)    | 11413 (75.3) | 11413 (75.2) | 22826 (75.2) |
| ≥65 and <75                                  | 2 (<0.1)     | 0            | 2 (<0.1)     | 2 (<0.1)    | 5 (0.2)     | 7 (0.1)     | 3008 (80.2) | 3105 (82.5) | 6113 (81.4) | 3012 (19.9)  | 3110 (20.5)  | 6122 (20.2)  |
| ≥75 and <85                                  | 0            | 0            | 0            | 1 (<0.1)    | 1 (<0.1)    | 2 (<0.1)    | 691 (18.4)  | 615 (16.3)  | 1306 (17.4) | 692 (4.6)    | 616 (4.1)    | 1308 (4.3)   |
| ≥85 Years                                    | 0            | 0            | 0            | 0           | 0           | 0           | 49 (1.3)    | 41 (1.1)    | 90 (1.2)    | 49 (0.3)     | 41 (0.3)     | 90 (0.3)     |
| Risk Factor for Severe Covid-19 at Screening |              |              |              |             |             |             |             |             |             |              |              |              |
| Chronic lung disease                         | 14 (0.2)     | 19 (0.2)     | 33 (0.2)     | 491 (19.4)  | 455 (18.0)  | 946 (18.7)  | 244 (6.5)   | 238 (6.3)   | 482 (6.4)   | 749 (4.9)    | 712 (4.7)    | 1461 (4.8)   |
| Significant cardiac disease                  | 10 (0.1)     | 11 (0.1)     | 21 (0.1)     | 282 (11.1)  | 312 (12.3)  | 594 (11.7)  | 450 (12.0)  | 439 (11.7)  | 889 (11.8)  | 742 (4.9)    | 762 (5.0)    | 1504 (5.0)   |
| Severe obesity                               | 67 (0.8)     | 61 (0.7)     | 128 (0.7)    | 837 (33.0)  | 836 (33.0)  | 1673 (33.0) | 154 (4.1)   | 173 (4.6)   | 327 (4.4)   | 1058 (7.0)   | 1070 (7.0)   | 2128 (7.0)   |
| Diabetes                                     | 36 (0.4)     | 34 (0.4)     | 70 (0.4)     | 878 (34.6)  | 887 (35.1)  | 1765 (34.8) | 543 (14.5)  | 539 (14.3)  | 1082 (14.4) | 1457 (9.6)   | 1460 (9.6)   | 2917 (9.6)   |
| Liver disease                                | 9 (0.1)      | 8 (<0.1)     | 17 (<0.1)    | 61 (2.4)    | 76 (3.0)    | 137 (2.7)   | 26 (0.7)    | 20 (0.5)    | 46 (0.6)    | 96 (0.6)     | 104 (0.7)    | 200 (0.7)    |
| HIV                                          | 14 (0.2)     | 11 (0.1)     | 25 (0.1)     | 61 (2.4)    | 66 (2.6)    | 127 (2.5)   | 16 (0.4)    | 17 (0.5)    | 33 (0.4)    | 91 (0.6)     | 94 (0.6)     | 185 (0.6)    |
| Occupational Risk                            |              |              |              |             |             |             |             |             |             |              |              |              |
| Healthcare Workers                           | 7994 (90.0)  | 7969 (89.7)  | 15963 (89.8) | 2172 (85.7) | 2156 (85.2) | 4328 (85.4) | 2385 (63.6) | 2371 (63.0) | 4756 (63.3) | 12551 (82.8) | 12496 (82.3) | 25047 (82.5) |
| Emergency Response                           | 2744 (30.9)  | 2744 (30.9)  | 5488 (30.9)  | 596 (23.5)  | 596 (23.6)  | 1192 (23.5) | 503 (13.4)  | 466 (12.4)  | 969 (12.9)  | 3843 (25.3)  | 3806 (25.1)  | 7649 (25.2)  |
| Retail/Restaurant                            | 219 (2.5)    | 234 (2.6)    | 453 (2.5)    | 58 (2.3)    | 48 (1.9)    | 106 (2.1)   | 19 (0.5)    | 20 (0.5)    | 39 (0.5)    | 296 (2.0)    | 302 (2.0)    | 598 (2.0)    |
|                                              | 694 (7.8)    | 684 (7.7)    | 1378 (7.8)   | 188 (7.4)   | 173 (6.8)   | 361 (7.1)   | 99 (2.6)    | 100 (2.7)   | 199 (2.6)   | 981 (6.5)    | 957 (6.3)    | 1938 (6.4)   |

|                                           |             |             |              |             |             |             |             |             |             |              |              |              |
|-------------------------------------------|-------------|-------------|--------------|-------------|-------------|-------------|-------------|-------------|-------------|--------------|--------------|--------------|
| Manufacturing and Production              | 307 (3.5)   | 290 (3.3)   | 597 (3.4)    | 84 (3.3)    | 101 (4.0)   | 185 (3.7)   | 30 (0.8)    | 35 (0.9)    | 65 (0.9)    | 421 (2.8)    | 426 (2.8)    | 847 (2.8)    |
| Warehouse Shipping and Fulfillment        | 121 (1.4)   | 138 (1.6)   | 259 (1.5)    | 42 (1.7)    | 43 (1.7)    | 85 (1.7)    | 12 (0.3)    | 9 (0.2)     | 21 (0.3)    | 175 (1.2)    | 190 (1.3)    | 365 (1.2)    |
| Transportation and Delivery               | 318 (3.6)   | 337 (3.8)   | 655 (3.7)    | 100 (3.9)   | 97 (3.8)    | 197 (3.9)   | 62 (1.7)    | 50 (1.3)    | 112 (1.5)   | 480 (3.2)    | 484 (3.2)    | 964 (3.2)    |
| Border Protection and Military Personnel  | 51 (0.6)    | 53 (0.6)    | 104 (0.6)    | 12 (0.5)    | 12 (0.5)    | 24 (0.5)    | 6 (0.2)     | 3 (<0.1)    | 9 (0.1)     | 69 (0.5)     | 68 (0.4)     | 137 (0.5)    |
| Personal Care and In-Home Services        | 329 (3.7)   | 303 (3.4)   | 632 (3.6)    | 78 (3.1)    | 102 (4.0)   | 180 (3.6)   | 61 (1.6)    | 67 (1.8)    | 128 (1.7)   | 468 (3.1)    | 472 (3.1)    | 940 (3.1)    |
| Hospitality and Tourism Workers           | 145 (1.6)   | 164 (1.8)   | 309 (1.7)    | 39 (1.5)    | 37 (1.5)    | 76 (1.5)    | 43 (1.1)    | 37 (1.0)    | 80 (1.1)    | 227 (1.5)    | 238 (1.6)    | 465 (1.5)    |
| Pastoral, Social or Public Health Workers | 264 (3.0)   | 297 (3.3)   | 561 (3.2)    | 102 (4.0)   | 90 (3.6)    | 192 (3.8)   | 138 (3.7)   | 148 (3.9)   | 286 (3.8)   | 504 (3.3)    | 535 (3.5)    | 1039 (3.4)   |
| Educators and Students                    | 1118 (12.6) | 1090 (12.3) | 2208 (12.4)  | 270 (10.7)  | 276 (10.9)  | 546 (10.8)  | 169 (4.5)   | 185 (4.9)   | 354 (4.7)   | 1557 (10.3)  | 1551 (10.2)  | 3108 (10.2)  |
| Other                                     | 2606 (29.3) | 2601 (29.3) | 5207 (29.3)  | 793 (31.3)  | 817 (32.3)  | 1610 (31.8) | 1431 (38.2) | 1432 (38.1) | 2863 (38.1) | 4830 (31.8)  | 4850 (31.9)  | 9680 (31.9)  |
| Location and Living Circumstances Risk    | 7490 (84.3) | 7537 (84.8) | 15027 (84.6) | 2095 (82.6) | 2065 (81.6) | 4160 (82.1) | 3104 (82.8) | 3130 (83.2) | 6234 (83.0) | 12689 (83.7) | 12732 (83.9) | 25421 (83.8) |
| Nursing Home or Assisted Living Facility  | 6 (<0.1)    | 12 (0.1)    | 18 (0.1)     | 3 (0.1)     | 12 (0.5)    | 15 (0.3)    | 20 (0.5)    | 11 (0.3)    | 31 (0.4)    | 29 (0.2)     | 35 (0.2)     | 64 (0.2)     |
| Multi-Family Dwelling                     | 269 (3.0)   | 306 (3.4)   | 575 (3.2)    | 79 (3.1)    | 91 (3.6)    | 170 (3.4)   | 65 (1.7)    | 66 (1.8)    | 131 (1.7)   | 413 (2.7)    | 463 (3.1)    | 876 (2.9)    |
| High Density Housing                      | 877 (9.9)   | 842 (9.5)   | 1719 (9.7)   | 196 (7.7)   | 196 (7.7)   | 392 (7.7)   | 240 (6.4)   | 253 (6.7)   | 493 (6.6)   | 1313 (8.7)   | 1291 (8.5)   | 2604 (8.6)   |
| Low Density, Multi-Family Setting         | 958 (10.8)  | 945 (10.6)  | 1903 (10.7)  | 278 (11.0)  | 303 (12.0)  | 581 (11.5)  | 256 (6.8)   | 244 (6.5)   | 500 (6.6)   | 1492 (9.8)   | 1492 (9.8)   | 2984 (9.8)   |
| Single Family Home                        | 4773 (53.7) | 4813 (54.2) | 9586 (53.9)  | 1380 (54.4) | 1304 (51.5) | 2684 (53.0) | 2257 (60.2) | 2281 (60.6) | 4538 (60.4) | 8410 (55.5)  | 8398 (55.3)  | 16808 (55.4) |
| Other                                     | 1313 (14.8) | 1336 (15.0) | 2649 (14.9)  | 334 (13.2)  | 314 (12.4)  | 648 (12.8)  | 529 (14.1)  | 547 (14.5)  | 1076 (14.3) | 2176 (14.3)  | 2197 (14.5)  | 4373 (14.4)  |

Percentages are based on the number of participants in full analysis set (FAS), presented for overall and 3 age stratification groups. Baseline SARS-CoV-2 status was positive if there was immunologic or virologic evidence of prior Covid-19, defined as positive RT-PCR test or positive bAb result at day 1; negative was defined as negative RT-PCR test and negative bAb result at day 1. \*White was defined as white and non-Hispanic, and communities of color includes all the others whose race or ethnicity is not unknown, unreported or missing. †Baseline SARS-CoV-2 Status was considered positive if there was immunologic or virologic evidence of prior Covid-19, defined as positive RT-PCR test or bAb result at day 1; negative was defined as negative RT-PCR test and bAb results at day 1. Age and health risk for severe Covid-19 are derived from age and risk factors collected on case report form. Note that some participants were incorrectly stratified on the basis of Covid-19 risk. Data cutoff: March 26, 2021.

**Table S6. Solicited Adverse Events Overall and Age Groups by Grade, 1st Injection, Solicited Safety Set**

| n (%)                         | Overall            |                      | ≥18-<65 years      |                      | ≥65 yrs           |                     |
|-------------------------------|--------------------|----------------------|--------------------|----------------------|-------------------|---------------------|
|                               | Placebo<br>N=15151 | mRNA-1273<br>N=15166 | Placebo<br>N=11402 | mRNA-1273<br>N=11406 | Placebo<br>N=3749 | mRNA-1273<br>N=3760 |
| Any solicited AE              | 7285 (48.1)        | 13317 (87.8)         | 5737 (50.3)        | 10262 (90.0)         | 1548 (41.3)       | 3055 (81.3)         |
| Grade 1                       | 5134 (33.9)        | 9329 (61.5)          | 3993 (35.0)        | 6951 (60.9)          | 1141 (30.4)       | 2378 (63.2)         |
| Grade 2                       | 1782 (11.8)        | 3134 (20.7)          | 1466 (12.9)        | 2601 (22.8)          | 316 (8.4)         | 533 (14.2)          |
| Grade 3                       | 363 (2.4)          | 849 (5.6)            | 274 (2.4)          | 705 (6.2)            | 89 (2.4)          | 144 (3.8)           |
| Grade 4                       | 6 (<0.1)           | 5 (<0.1)             | 4 (<0.1)           | 5 (<0.1)             | 2 (<0.1)          | 0                   |
| Any Local AE                  | 3009 (19.9)        | 12765 (84.2)         | 2436 (21.4)        | 9961 (87.4)          | 573 (15.3)        | 2804 (74.6)         |
| Grade 1                       | 2842 (18.8)        | 10725 (70.7)         | 2334 (20.5)        | 8151 (71.5)          | 508 (13.6)        | 2574 (68.5)         |
| Grade 2                       | 89 (0.6)           | 1511 (10.0)          | 63 (0.6)           | 1358 (11.9)          | 26 (0.7)          | 153 (4.1)           |
| Grade 3                       | 78 (0.5)           | 529 (3.5)            | 39 (0.3)           | 452 (4.0)            | 39 (1.0)          | 77 (2.0)            |
| Grade 4                       | 0                  | 0                    | 0                  | 0                    | 0                 | 0                   |
| Local AE                      |                    |                      |                    |                      |                   |                     |
| Pain                          | 2665 (17.6)        | 12688 (83.7)         | 2183 (19.1)        | 9908 (86.9)          | 482 (12.9)        | 2780 (73.9)         |
| Grade 1                       | 2551 (16.8)        | 10985 (72.5)         | 2116 (18.6)        | 8360 (73.3)          | 435 (11.6)        | 2625 (69.8)         |
| Grade 2                       | 59 (0.4)           | 1287 (8.5)           | 44 (0.4)           | 1182 (10.4)          | 15 (0.4)          | 105 (2.8)           |
| Grade 3                       | 55 (0.4)           | 416 (2.7)            | 23 (0.2)           | 366 (3.2)            | 32 (0.9)          | 50 (1.3)            |
| Erythema                      | 77 (0.5)           | 445 (2.9)            | 54 (0.5)           | 354 (3.1)            | 23 (0.6)          | 91 (2.4)            |
| Grade 1                       | 57 (0.4)           | 281 (1.9)            | 39 (0.3)           | 222 (1.9)            | 18 (0.5)          | 59 (1.6)            |
| Grade 2                       | 7 (<0.1)           | 122 (0.8)            | 4 (<0.1)           | 98 (0.9)             | 3 (<0.1)          | 24 (0.6)            |
| Grade 3                       | 13 (<0.1)          | 42 (0.3)             | 11 (<0.1)          | 34 (0.3)             | 2 (<0.1)          | 8 (0.2)             |
| Swelling                      | 65 (0.4)           | 935 (6.2)            | 42 (0.4)           | 766 (6.7)            | 23 (0.6)          | 169 (4.5)           |
| Grade 1                       | 50 (0.3)           | 608 (4.0)            | 35 (0.3)           | 499 (4.4)            | 15 (0.4)          | 109 (2.9)           |
| Grade 2                       | 9 (<0.1)           | 245 (1.6)            | 4 (<0.1)           | 205 (1.8)            | 5 (0.1)           | 40 (1.1)            |
| Grade 3                       | 6 (<0.1)           | 82 (0.5)             | 3 (<0.1)           | 62 (0.5)             | 3 (<0.1)          | 20 (0.5)            |
| Axillary swelling/tenderness* | 722 (4.8)          | 1553 (10.2)          | 567 (5.0)          | 1322 (11.6)          | 155 (4.1)         | 231 (6.1)           |
| Grade 1                       | 668 (4.4)          | 1394 (9.2)           | 534 (4.7)          | 1180 (10.3)          | 134 (3.6)         | 214 (5.7)           |
| Grade 2                       | 27 (0.2)           | 110 (0.7)            | 20 (0.2)           | 105 (0.9)            | 7 (0.2)           | 5 (0.1)             |
| Grade 3                       | 27 (0.2)           | 49 (0.3)             | 13 (0.1)           | 37 (0.3)             | 14 (0.4)          | 12 (0.3)            |
| Any Systemic AE               | 6397 (42.2)        | 8316 (54.8)          | 5063 (44.4)        | 6499 (57.0)          | 1334 (35.6)       | 1817 (48.3)         |
| Grade 1                       | 4334 (28.6)        | 5358 (35.3)          | 3367 (29.5)        | 4079 (35.8)          | 967 (25.8)        | 1279 (34.0)         |
| Grade 2                       | 1746 (11.5)        | 2504 (16.5)          | 1442 (12.6)        | 2050 (18.0)          | 304 (8.1)         | 454 (12.1)          |
| Grade 3                       | 311 (2.1)          | 449 (3.0)            | 250 (2.2)          | 365 (3.2)            | 61 (1.6)          | 84 (2.2)            |
| Grade 4                       | 6 (<0.1)           | 5 (<0.1)             | 4 (<0.1)           | 5 (<0.1)             | 2 (<0.1)          | 0                   |
| Systemic AE                   |                    |                      |                    |                      |                   |                     |
| Fever                         | 44 (0.3)           | 112 (0.7)            | 37 (0.3)           | 102 (0.9)            | 7 (0.2)           | 10 (0.3)            |
| Grade 1                       | 28 (0.2)           | 73 (0.5)             | 25 (0.2)           | 66 (0.6)             | 3 (<0.1)          | 7 (0.2)             |
| Grade 2                       | 8 (<0.1)           | 24 (0.2)             | 7 (<0.1)           | 22 (0.2)             | 1 (<0.1)          | 2 (<0.1)            |
| Grade 3                       | 2 (<0.1)           | 11 (<0.1)            | 1 (<0.1)           | 10 (<0.1)            | 1 (<0.1)          | 1 (<0.1)            |
| Grade 4                       | 6 (<0.1)           | 4 (<0.1)             | 4 (<0.1)           | 4 (<0.1)             | 2 (<0.1)          | 0                   |
| Headache                      | 4026 (26.6)        | 4950 (32.6)          | 3303 (29.0)        | 4028 (35.3)          | 723 (19.3)        | 922 (24.5)          |
| Grade 1                       | 3297 (21.8)        | 3947 (26.0)          | 2668 (23.4)        | 3168 (27.8)          | 629 (16.8)        | 779 (20.7)          |
| Grade 2                       | 532 (3.5)          | 730 (4.8)            | 472 (4.1)          | 640 (5.6)            | 60 (1.6)          | 90 (2.4)            |
| Grade 3                       | 197 (1.3)          | 273 (1.8)            | 163 (1.4)          | 220 (1.9)            | 34 (0.9)          | 53 (1.4)            |
| Fatigue                       | 4133 (27.3)        | 5636 (37.2)          | 3281 (28.8)        | 4385 (38.5)          | 852 (22.7)        | 1251 (33.3)         |
| Grade 1                       | 2705 (17.9)        | 3585 (23.6)          | 2100 (18.4)        | 2732 (24.0)          | 605 (16.2)        | 853 (22.7)          |
| Grade 2                       | 1323 (8.7)         | 1899 (12.5)          | 1098 (9.6)         | 1531 (13.4)          | 225 (6.0)         | 368 (9.8)           |
| Grade 3                       | 105 (0.7)          | 151 (1.0)            | 83 (0.7)           | 121 (1.1)            | 22 (0.6)          | 30 (0.8)            |
| Grade 4                       | 0                  | 1 (<0.1)             | 0                  | 1 (<0.1)             | 0                 | 0                   |
| Myalgia                       | 2069 (13.7)        | 3442 (22.7)          | 1625 (14.3)        | 2700 (23.7)          | 444 (11.9)        | 742 (19.7)          |
| Grade 1                       | 1560 (10.3)        | 2442 (16.1)          | 1200 (10.5)        | 1874 (16.4)          | 360 (9.6)         | 568 (15.1)          |
| Grade 2                       | 462 (3.1)          | 909 (6.0)            | 387 (3.4)          | 752 (6.6)            | 75 (2.0)          | 157 (4.2)           |
| Grade 3                       | 47 (0.3)           | 91 (0.6)             | 38 (0.3)           | 74 (0.6)             | 9 (0.2)           | 17 (0.5)            |
| Arthralgia                    | 1784 (11.8)        | 2510 (16.6)          | 1327 (11.6)        | 1892 (16.6)          | 457 (12.2)        | 618 (16.4)          |

|                                                                                                                                                                                                                                                                                                                                                                                                                                                                                                                                                                 |            |             |           |             |           |            |
|-----------------------------------------------------------------------------------------------------------------------------------------------------------------------------------------------------------------------------------------------------------------------------------------------------------------------------------------------------------------------------------------------------------------------------------------------------------------------------------------------------------------------------------------------------------------|------------|-------------|-----------|-------------|-----------|------------|
| Grade 1                                                                                                                                                                                                                                                                                                                                                                                                                                                                                                                                                         | 1333 (8.8) | 1842 (12.1) | 966 (8.5) | 1368 (12.0) | 367 (9.8) | 474 (12.6) |
| Grade 2                                                                                                                                                                                                                                                                                                                                                                                                                                                                                                                                                         | 413 (2.7)  | 607 (4.0)   | 331 (2.9) | 476 (4.2)   | 82 (2.2)  | 131 (3.5)  |
| Grade 3                                                                                                                                                                                                                                                                                                                                                                                                                                                                                                                                                         | 38 (0.3)   | 60 (0.4)    | 30 (0.3)  | 47 (0.4)    | 8 (0.2)   | 13 (0.3)   |
| Grade 4                                                                                                                                                                                                                                                                                                                                                                                                                                                                                                                                                         | 0          | 1 (<0.1)    | 0         | 1 (<0.1)    | 0         | 0          |
| Nausea/vomiting                                                                                                                                                                                                                                                                                                                                                                                                                                                                                                                                                 | 1075 (7.1) | 1262 (8.3)  | 908 (8.0) | 1068 (9.4)  | 167 (4.5) | 194 (5.2)  |
| Grade 1                                                                                                                                                                                                                                                                                                                                                                                                                                                                                                                                                         | 887 (5.9)  | 1047 (6.9)  | 749 (6.6) | 889 (7.8)   | 138 (3.7) | 158 (4.2)  |
| Grade 2                                                                                                                                                                                                                                                                                                                                                                                                                                                                                                                                                         | 175 (1.2)  | 205 (1.4)   | 151 (1.3) | 173 (1.5)   | 24 (0.6)  | 32 (0.9)   |
| Grade 3                                                                                                                                                                                                                                                                                                                                                                                                                                                                                                                                                         | 13 (<0.1)  | 10 (<0.1)   | 8 (<0.1)  | 6 (<0.1)    | 5 (0.1)   | 4 (0.1)    |
| Chills                                                                                                                                                                                                                                                                                                                                                                                                                                                                                                                                                          | 878 (5.8)  | 1251 (8.3)  | 730 (6.4) | 1050 (9.2)  | 148 (4.0) | 201 (5.3)  |
| Grade 1                                                                                                                                                                                                                                                                                                                                                                                                                                                                                                                                                         | 706 (4.7)  | 938 (6.2)   | 584 (5.1) | 780 (6.8)   | 122 (3.3) | 158 (4.2)  |
| Grade 2                                                                                                                                                                                                                                                                                                                                                                                                                                                                                                                                                         | 158 (1.0)  | 289 (1.9)   | 138 (1.2) | 253 (2.2)   | 20 (0.5)  | 36 (1.0)   |
| Grade 3                                                                                                                                                                                                                                                                                                                                                                                                                                                                                                                                                         | 14 (<0.1)  | 24 (0.2)    | 8 (<0.1)  | 17 (0.1)    | 6 (0.2)   | 7 (0.2)    |
| <p>n=Number of exposed participants who submitted any for the event; percentages are based on the number of exposed participants who submitted any data for the event in the solicited safety set. Any = Grade 1 or higher. Toxicity grade for Erythema (Redness) is defined as: G1 = 25 - 50 mm; G2 = 51 -100 mm; G3 = &gt;100 mm. Toxicity grade for fever is defined as: G1 = 38 - 38.4 C; G2 = 38.5 - 38.9 C; G3 = 39 -40 C; G4 = &gt;40 C. *Localized axillary swelling or tenderness ipsilateral to the vaccination arm. Data cutoff: March 26, 2021.</p> |            |             |           |             |           |            |

**Table S7. Solicited Adverse Events Overall and Age Groups by Grade, 2<sup>nd</sup> Injection, Solicited Safety Set**

| Adverse events n (%)          | Overall            |                 | ≥18-<65 years      |                      | ≥65 years         |                     |
|-------------------------------|--------------------|-----------------|--------------------|----------------------|-------------------|---------------------|
|                               | Placebo<br>N=14578 | mRNA<br>N=14691 | Placebo<br>N=10929 | mRNA-1273<br>N=11000 | Placebo<br>N=3649 | mRNA-1273<br>N=3691 |
| Any solicited AE              | 6255 (42.9)        | 13556 (92.3)    | 4921 (45.0)        | 10252 (93.2)         | 1334 (36.6)       | 3304 (89.5)         |
| Grade 1                       | 4346 (29.8)        | 4847 (33.0)     | 3392 (31.0)        | 3290 (29.9)          | 954 (26.1)        | 1557 (42.2)         |
| Grade 2                       | 1558 (10.7)        | 5800 (39.5)     | 1266 (11.6)        | 4592 (41.7)          | 292 (8.0)         | 1208 (32.7)         |
| Grade 3                       | 348 (2.4)          | 2895 (19.7)     | 261 (2.4)          | 2358 (21.4)          | 87 (2.4)          | 537 (14.5)          |
| Grade 4                       | 3 (<0.1)           | 14 (<0.1)       | 2 (<0.1)           | 12 (0.1)             | 1 (<0.1)          | 2 (<0.1)            |
| Any Local AE                  | 2757 (18.9)        | 13029 (88.7)    | 2262 (20.7)        | 9936 (90.3)          | 495 (13.6)        | 3093 (83.8)         |
| Grade 1                       | 2594 (17.8)        | 8789 (59.8)     | 2145 (19.6)        | 6424 (58.4)          | 449 (12.3)        | 2365 (64.1)         |
| Grade 2                       | 88 (0.6)           | 3217 (21.9)     | 73 (0.7)           | 2709 (24.6)          | 15 (0.4)          | 508 (13.8)          |
| Grade 3                       | 75 (0.5)           | 1023 (7.0)      | 44 (0.4)           | 803 (7.3)            | 31 (0.8)          | 220 (6.0)           |
| Grade 4                       | 0                  | 0               | 0                  | 0                    | 0                 | 0                   |
| Local AE                      |                    |                 |                    |                      |                   |                     |
| Pain                          | 2486 (17.1)        | 12964 (88.3)    | 2048 (18.7)        | 9893 (89.9)          | 438 (12.0)        | 3071 (83.2)         |
| Grade 1                       | 2384 (16.4)        | 9508 (64.7)     | 1978 (18.1)        | 6933 (63.0)          | 406 (11.1)        | 2575 (69.8)         |
| Grade 2                       | 61 (0.4)           | 2850 (19.4)     | 48 (0.4)           | 2454 (22.3)          | 13 (0.4)          | 396 (10.7)          |
| Grade 3                       | 41 (0.3)           | 606 (4.1)       | 22 (0.2)           | 506 (4.6)            | 19 (0.5)          | 100 (2.7)           |
| Erythema                      | 68 (0.5)           | 1274 (8.7)      | 53 (0.5)           | 989 (9.0)            | 15 (0.4)          | 285 (7.7)           |
| Grade 1                       | 48 (0.3)           | 456 (3.1)       | 36 (0.3)           | 358 (3.3)            | 12 (0.3)          | 98 (2.7)            |
| Grade 2                       | 5 (<0.1)           | 531 (3.6)       | 5 (<0.1)           | 421 (3.8)            | 0                 | 110 (3.0)           |
| Grade 3                       | 15 (0.1)           | 287 (2.0)       | 12 (0.1)           | 210 (1.9)            | 3 (<0.1)          | 77 (2.1)            |
| Swelling                      | 60 (0.4)           | 1807 (12.3)     | 46 (0.4)           | 1399 (12.7)          | 14 (0.4)          | 408 (11.1)          |
| Grade 1                       | 38 (0.3)           | 900 (6.1)       | 32 (0.3)           | 706 (6.4)            | 6 (0.2)           | 194 (5.3)           |
| Grade 2                       | 10 (<0.1)          | 652 (4.4)       | 9 (<0.1)           | 510 (4.6)            | 1 (<0.1)          | 142 (3.8)           |
| Grade 3                       | 12 (<0.1)          | 255 (1.7)       | 5 (<0.1)           | 183 (1.7)            | 7 (0.2)           | 72 (2.0)            |
| Axillary swelling/tenderness* | 571 (3.9)          | 2092 (14.2)     | 474 (4.3)          | 1777 (16.2)          | 97 (2.7)          | 315 (8.5)           |
| Grade 1                       | 523 (3.6)          | 1735 (11.8)     | 435 (4.0)          | 1468 (13.3)          | 88 (2.4)          | 267 (7.2)           |
| Grade 2                       | 28 (0.2)           | 289 (2.0)       | 27 (0.2)           | 262 (2.4)            | 1 (<0.1)          | 27 (0.7)            |
| Grade 3                       | 20 (0.1)           | 68 (0.5)        | 12 (0.1)           | 47 (0.4)             | 8 (0.2)           | 21 (0.6)            |
| Any Systemic AE               | 5343 (36.7)        | 11678 (79.5)    | 4208 (38.5)        | 9023 (82.0)          | 1135 (31.1)       | 2655 (71.9)         |
| Grade 1                       | 3519 (24.1)        | 3717 (25.3)     | 2731 (25.0)        | 2615 (23.8)          | 788 (21.6)        | 1102 (29.9)         |
| Grade 2                       | 1535 (10.5)        | 5611 (38.2)     | 1248 (11.4)        | 4458 (40.5)          | 287 (7.9)         | 1153 (31.2)         |
| Grade 3                       | 286 (2.0)          | 2336 (15.9)     | 227 (2.1)          | 1938 (17.6)          | 59 (1.6)          | 398 (10.8)          |
| Grade 4                       | 3 (<0.1)           | 14 (<0.1)       | 2 (<0.1)           | 12 (0.1)             | 1 (<0.1)          | 2 (<0.1)            |
| Systemic AE                   |                    |                 |                    |                      |                   |                     |
| Fever                         | 43 (0.3)           | 2276 (15.5)     | 38 (0.3)           | 1909 (17.4)          | 5 (0.1)           | 367 (9.9)           |
| Grade 1                       | 33 (0.2)           | 1363 (9.3)      | 30 (0.3)           | 1112 (10.1)          | 3 (<0.1)          | 251 (6.8)           |
| Grade 2                       | 5 (<0.1)           | 697 (4.7)       | 4 (<0.1)           | 600 (5.5)            | 1 (<0.1)          | 97 (2.6)            |
| Grade 3                       | 2 (<0.1)           | 203 (1.4)       | 2 (<0.1)           | 185 (1.7)            | 0                 | 18 (0.5)            |
| Grade 4                       | 3 (<0.1)           | 13 (<0.1)       | 2 (<0.1)           | 12 (0.1)             | 1 (<0.1)          | 1 (<0.1)            |
| Headache                      | 3427 (23.5)        | 8637 (58.8)     | 2775 (25.4)        | 6929 (63.0)          | 652 (17.9)        | 1708 (46.3)         |
| Grade 1                       | 2740 (18.8)        | 4815 (32.8)     | 2182 (20.0)        | 3669 (33.4)          | 558 (15.3)        | 1146 (31.1)         |
| Grade 2                       | 522 (3.6)          | 3156 (21.5)     | 461 (4.2)          | 2701 (24.6)          | 61 (1.7)          | 455 (12.3)          |
| Grade 3                       | 165 (1.1)          | 666 (4.5)       | 132 (1.2)          | 559 (5.1)            | 33 (0.9)          | 107 (2.9)           |
| Fatigue                       | 3418 (23.5)        | 9607 (65.4)     | 2701 (24.7)        | 7453 (67.8)          | 717 (19.6)        | 2154 (58.4)         |
| Grade 1                       | 2181 (15.0)        | 3431 (23.4)     | 1701 (15.6)        | 2527 (23.0)          | 480 (13.2)        | 904 (24.5)          |
| Grade 2                       | 1129 (7.7)         | 4743 (32.3)     | 912 (8.3)          | 3748 (34.1)          | 217 (5.9)         | 995 (27.0)          |
| Grade 3                       | 108 (0.7)          | 1433 (9.8)      | 88 (0.8)           | 1178 (10.7)          | 20 (0.5)          | 255 (6.9)           |
| Myalgia                       | 1824 (12.5)        | 8529 (58.1)     | 1425 (13.0)        | 6789 (61.7)          | 399 (10.9)        | 1740 (47.2)         |
| Grade 1                       | 1307 (9.0)         | 3242 (22.1)     | 1002 (9.2)         | 2415 (22.0)          | 305 (8.4)         | 827 (22.4)          |
| Grade 2                       | 465 (3.2)          | 3966 (27.0)     | 381 (3.5)          | 3258 (29.6)          | 84 (2.3)          | 708 (19.2)          |
| Grade 3                       | 52 (0.4)           | 1321 (9.0)      | 42 (0.4)           | 1116 (10.1)          | 10 (0.3)          | 205 (5.6)           |
| Arthralgia                    | 1579 (10.8)        | 6303 (42.9)     | 1180 (10.8)        | 5010 (45.6)          | 399 (10.9)        | 1293 (35.1)         |
| Grade 1                       | 1143 (7.8)         | 2809 (19.1)     | 841 (7.7)          | 2111 (19.2)          | 302 (8.3)         | 698 (18.9)          |
| Grade 2                       | 392 (2.7)          | 2719 (18.5)     | 302 (2.8)          | 2249 (20.4)          | 90 (2.5)          | 470 (12.7)          |
| Grade 3                       | 44 (0.3)           | 775 (5.3)       | 37 (0.3)           | 650 (5.9)            | 7 (0.2)           | 125 (3.4)           |
| Nausea/vomiting               | 941 (6.5)          | 2794 (19.0)     | 807 (7.4)          | 2355 (21.4)          | 134 (3.7)         | 439 (11.9)          |
| Grade 1                       | 761 (5.2)          | 2094 (14.3)     | 651 (6.0)          | 1755 (16.0)          | 110 (3.0)         | 339 (9.2)           |

|                                                                                                                                                                                                                                                                                                                                                                                                                                                                                                                                                                 |           |             |           |             |           |             |
|-----------------------------------------------------------------------------------------------------------------------------------------------------------------------------------------------------------------------------------------------------------------------------------------------------------------------------------------------------------------------------------------------------------------------------------------------------------------------------------------------------------------------------------------------------------------|-----------|-------------|-----------|-------------|-----------|-------------|
| Grade 2                                                                                                                                                                                                                                                                                                                                                                                                                                                                                                                                                         | 169 (1.2) | 678 (4.6)   | 148 (1.4) | 589 (5.4)   | 21 (0.6)  | 89 (2.4)    |
| Grade 3                                                                                                                                                                                                                                                                                                                                                                                                                                                                                                                                                         | 11 (<0.1) | 21 (0.1)    | 8 (<0.1)  | 11 (0.1)    | 3 (<0.1)  | 10 (0.3)    |
| Grade 4                                                                                                                                                                                                                                                                                                                                                                                                                                                                                                                                                         | 0         | 1 (<0.1)    | 0         | 0           | 0         | 1 (<0.1)    |
| Chills                                                                                                                                                                                                                                                                                                                                                                                                                                                                                                                                                          | 813 (5.6) | 6500 (44.3) | 662 (6.1) | 5357 (48.7) | 151 (4.1) | 1143 (31.0) |
| Grade 1                                                                                                                                                                                                                                                                                                                                                                                                                                                                                                                                                         | 629 (4.3) | 2907 (19.8) | 505 (4.6) | 2316 (21.1) | 124 (3.4) | 591 (16.0)  |
| Grade 2                                                                                                                                                                                                                                                                                                                                                                                                                                                                                                                                                         | 167 (1.1) | 3402 (23.2) | 142 (1.3) | 2877 (26.2) | 25 (0.7)  | 525 (14.2)  |
| Grade 3                                                                                                                                                                                                                                                                                                                                                                                                                                                                                                                                                         | 17 (0.1)  | 191 (1.3)   | 15 (0.1)  | 164 (1.5)   | 2 (<0.1)  | 27 (0.7)    |
| <p>n=Number of exposed participants who submitted any for the event; percentages are based on the number of exposed participants who submitted any data for the event in the solicited safety set. Any = Grade 1 or higher. Toxicity grade for Erythema (Redness) is defined as: G1 = 25 - 50 mm; G2 = 51 -100 mm; G3 = &gt;100 mm. Toxicity grade for fever is defined as: G1 = 38 - 38.4 C; G2 = 38.5 - 38.9 C; G3 = 39 -40 C; G4 = &gt;40 C. *Localized axillary swelling or tenderness ipsilateral to the vaccination arm. Data cutoff: March 26, 2021.</p> |           |             |           |             |           |             |

**Table S8. Solicited Adverse Events by Sex, 1<sup>st</sup> and 2<sup>nd</sup> Injections, Solicited Safety Set**

| Adverse events n (%)          | Injection 1       |                     |                   |                     | Injection 2       |                     |                   |                     |
|-------------------------------|-------------------|---------------------|-------------------|---------------------|-------------------|---------------------|-------------------|---------------------|
|                               | Male              |                     | Female            |                     | Male              |                     | Female            |                     |
|                               | Placebo<br>N=8050 | mRNA-1273<br>N=7906 | Placebo<br>N=7101 | mRNA-1273<br>N=7260 | Placebo<br>N=7731 | mRNA-1273<br>N=7646 | Placebo<br>N=6847 | mRNA-1273<br>N=7045 |
| Any solicited AE              | 3625 (45.0)       | 6761 (85.5)         | 3660 (51.5)       | 6556 (90.3)         | 2963 (38.3)       | 6921 (90.5)         | 3292 (48.1)       | 6635 (94.2)         |
| Grade 1                       | 2654 (33.0)       | 5060 (64.0)         | 2480 (34.9)       | 4269 (58.8)         | 2140 (27.7)       | 2945 (38.5)         | 2206 (32.2)       | 1902 (27.0)         |
| Grade 2                       | 822 (10.2)        | 1354 (17.1)         | 960 (13.5)        | 1780 (24.5)         | 683 (8.8)         | 2846 (37.2)         | 875 (12.8)        | 2954 (41.9)         |
| Grade 3                       | 145 (1.8)         | 346 (4.4)           | 218 (3.1)         | 503 (6.9)           | 138 (1.8)         | 1126 (14.7)         | 210 (3.1)         | 1769 (25.1)         |
| Grade 4                       | 4 (<0.1)          | 1 (<0.1)            | 2 (<0.1)          | 4 (<0.1)            | 2 (<0.1)          | 4 (<0.1)            | 1 (<0.1)          | 10 (0.1)            |
| Any Local AE                  | 1481 (18.4)       | 6446 (81.5)         | 1528 (21.5)       | 6319 (87.1)         | 1320 (17.1)       | 6606 (86.4)         | 1437 (21.0)       | 6423 (91.2)         |
| Grade 1                       | 1391 (17.3)       | 5623 (71.1)         | 1451 (20.4)       | 5102 (70.3)         | 1239 (16.0)       | 4982 (65.2)         | 1355 (19.8)       | 3807 (54.1)         |
| Grade 2                       | 49 (0.6)          | 601 (7.6)           | 40 (0.6)          | 910 (12.5)          | 40 (0.5)          | 1249 (16.3)         | 48 (0.7)          | 1968 (27.9)         |
| Grade 3                       | 41 (0.5)          | 222 (2.8)           | 37 (0.5)          | 307 (4.2)           | 41 (0.5)          | 375 (4.9)           | 34 (0.5)          | 648 (9.2)           |
| Local AE                      |                   |                     |                   |                     |                   |                     |                   |                     |
| Pain                          | 1288 (16.0)       | 6408 (81.1)         | 1377 (19.4)       | 6280 (86.5)         | 1178 (15.2)       | 6571 (85.9)         | 1308 (19.1)       | 6393 (90.8)         |
| Grade 1                       | 1228 (15.3)       | 5747 (72.7)         | 1323 (18.6)       | 5238 (72.2)         | 1126 (14.6)       | 5280 (69.1)         | 1258 (18.4)       | 4228 (60.0)         |
| Grade 2                       | 33 (0.4)          | 498 (6.3)           | 26 (0.4)          | 789 (10.9)          | 28 (0.4)          | 1074 (14.0)         | 33 (0.5)          | 1776 (25.2)         |
| Grade 3                       | 27 (0.3)          | 163 (2.1)           | 28 (0.4)          | 253 (3.5)           | 24 (0.3)          | 217 (2.8)           | 17 (0.2)          | 389 (5.5)           |
| Erythema                      | 50 (0.6)          | 167 (2.1)           | 27 (0.4)          | 278 (3.8)           | 38 (0.5)          | 436 (5.7)           | 30 (0.4)          | 838 (11.9)          |
| Grade 1                       | 37 (0.5)          | 106 (1.3)           | 20 (0.3)          | 175 (2.4)           | 30 (0.4)          | 181 (2.4)           | 18 (0.3)          | 275 (3.9)           |
| Grade 2                       | 3 (<0.1)          | 38 (0.5)            | 4 (<0.1)          | 84 (1.2)            | 3 (<0.1)          | 148 (1.9)           | 2 (<0.1)          | 383 (5.4)           |
| Grade 3                       | 10 (0.1)          | 23 (0.3)            | 3 (<0.1)          | 19 (0.3)            | 5 (<0.1)          | 107 (1.4)           | 10 (0.1)          | 180 (2.6)           |
| Swelling                      | 41 (0.5)          | 423 (5.4)           | 24 (0.3)          | 512 (7.1)           | 30 (0.4)          | 735 (9.6)           | 30 (0.4)          | 1072 (15.2)         |
| Grade 1                       | 30 (0.4)          | 275 (3.5)           | 20 (0.3)          | 333 (4.6)           | 21 (0.3)          | 415 (5.4)           | 17 (0.2)          | 485 (6.9)           |
| Grade 2                       | 6 (<0.1)          | 106 (1.3)           | 3 (<0.1)          | 139 (1.9)           | 3 (<0.1)          | 235 (3.1)           | 7 (0.1)           | 417 (5.9)           |
| Grade 3                       | 5 (<0.1)          | 42 (0.5)            | 1 (<0.1)          | 40 (0.6)            | 6 (<0.1)          | 85 (1.1)            | 6 (<0.1)          | 170 (2.4)           |
| Axillary swelling/tenderness* | 384 (4.8)         | 726 (9.2)           | 338 (4.8)         | 827 (11.4)          | 290 (3.8)         | 890 (11.6)          | 281 (4.1)         | 1202 (17.1)         |
| Grade 1                       | 361 (4.5)         | 675 (8.5)           | 307 (4.3)         | 719 (9.9)           | 266 (3.4)         | 777 (10.2)          | 257 (3.8)         | 958 (13.6)          |
| Grade 2                       | 12 (0.1)          | 34 (0.4)            | 15 (0.2)          | 76 (1.0)            | 13 (0.2)          | 92 (1.2)            | 15 (0.2)          | 197 (2.8)           |
| Grade 3                       | 11 (0.1)          | 17 (0.2)            | 16 (0.2)          | 32 (0.4)            | 11 (0.1)          | 21 (0.3)            | 9 (0.1)           | 47 (0.7)            |
| Any Systemic AE               | 3153 (39.2)       | 4010 (50.7)         | 3244 (45.7)       | 4306 (59.3)         | 2482 (32.1)       | 5804 (75.9)         | 2861 (41.8)       | 5874 (83.4)         |
| Grade 1                       | 2237 (27.8)       | 2743 (34.7)         | 2097 (29.5)       | 2615 (36.0)         | 1706 (22.1)       | 2146 (28.1)         | 1813 (26.5)       | 1571 (22.3)         |
| Grade 2                       | 798 (9.9)         | 1093 (13.8)         | 948 (13.4)        | 1411 (19.4)         | 669 (8.7)         | 2752 (36.0)         | 866 (12.6)        | 2859 (40.6)         |
| Grade 3                       | 114 (1.4)         | 173 (2.2)           | 197 (2.8)         | 276 (3.8)           | 105 (1.4)         | 902 (11.8)          | 181 (2.6)         | 1434 (20.4)         |
| Grade 4                       | 4 (<0.1)          | 1 (<0.1)            | 2 (<0.1)          | 4 (<0.1)            | 2 (<0.1)          | 4 (<0.1)            | 1 (<0.1)          | 10 (0.1)            |
| Systemic AE                   |                   |                     |                   |                     |                   |                     |                   |                     |

|                 |             |             |             |             |             |             |             |             |
|-----------------|-------------|-------------|-------------|-------------|-------------|-------------|-------------|-------------|
| Fever           | 15 (0.2)    | 50 (0.6)    | 29 (0.4)    | 62 (0.9)    | 22 (0.3)    | 1000 (13.1) | 21 (0.3)    | 1276 (18.1) |
| Grade 1         | 7 (<0.1)    | 33 (0.4)    | 21 (0.3)    | 40 (0.6)    | 15 (0.2)    | 609 (8.0)   | 18 (0.3)    | 754 (10.7)  |
| Grade 2         | 2 (<0.1)    | 10 (0.1)    | 6 (<0.1)    | 14 (0.2)    | 4 (<0.1)    | 294 (3.8)   | 1 (<0.1)    | 403 (5.7)   |
| Grade 3         | 2 (<0.1)    | 6 (<0.1)    | 0           | 5 (<0.1)    | 1 (<0.1)    | 93 (1.2)    | 1 (<0.1)    | 110 (1.6)   |
| Grade 4         | 4 (<0.1)    | 1 (<0.1)    | 2 (<0.1)    | 3 (<0.1)    | 2 (<0.1)    | 4 (<0.1)    | 1 (<0.1)    | 9 (0.1)     |
| Headache        | 1844 (22.9) | 2215 (28.0) | 2182 (30.7) | 2735 (37.7) | 1494 (19.3) | 4043 (52.9) | 1933 (28.2) | 4594 (65.2) |
| Grade 1         | 1595 (19.8) | 1863 (23.6) | 1702 (24.0) | 2084 (28.7) | 1243 (16.1) | 2535 (33.2) | 1497 (21.9) | 2280 (32.4) |
| Grade 2         | 188 (2.3)   | 259 (3.3)   | 344 (4.8)   | 471 (6.5)   | 201 (2.6)   | 1286 (16.8) | 321 (4.7)   | 1870 (26.6) |
| Grade 3         | 61 (0.8)    | 93 (1.2)    | 136 (1.9)   | 180 (2.5)   | 50 (0.6)    | 222 (2.9)   | 115 (1.7)   | 444 (6.3)   |
| Fatigue         | 2041 (25.4) | 2667 (33.7) | 2092 (29.5) | 2969 (40.9) | 1620 (21.0) | 4700 (61.5) | 1798 (26.3) | 4907 (69.7) |
| Grade 1         | 1396 (17.4) | 1786 (22.6) | 1309 (18.4) | 1799 (24.8) | 1076 (13.9) | 1876 (24.5) | 1105 (16.1) | 1555 (22.1) |
| Grade 2         | 602 (7.5)   | 812 (10.3)  | 721 (10.2)  | 1087 (15.0) | 494 (6.4)   | 2260 (29.6) | 635 (9.3)   | 2483 (35.3) |
| Grade 3         | 43 (0.5)    | 69 (0.9)    | 62 (0.9)    | 82 (1.1)    | 50 (0.6)    | 564 (7.4)   | 58 (0.8)    | 869 (12.3)  |
| Grade 4         | 0           | 0           | 0           | 1 (<0.1)    | 0           | 0           | 0           | 0           |
| Myalgia         | 1067 (13.3) | 1760 (22.3) | 1002 (14.1) | 1682 (23.2) | 883 (11.4)  | 4226 (55.3) | 941 (13.7)  | 4303 (61.1) |
| Grade 1         | 831 (10.3)  | 1288 (16.3) | 729 (10.3)  | 1154 (15.9) | 646 (8.4)   | 1847 (24.2) | 661 (9.7)   | 1395 (19.8) |
| Grade 2         | 216 (2.7)   | 434 (5.5)   | 246 (3.5)   | 475 (6.5)   | 213 (2.8)   | 1894 (24.8) | 252 (3.7)   | 2072 (29.4) |
| Grade 3         | 20 (0.2)    | 38 (0.5)    | 27 (0.4)    | 53 (0.7)    | 24 (0.3)    | 485 (6.3)   | 28 (0.4)    | 836 (11.9)  |
| Arthralgia      | 935 (11.6)  | 1305 (16.5) | 849 (12.0)  | 1205 (16.6) | 757 (9.8)   | 3126 (40.9) | 822 (12.0)  | 3177 (45.1) |
| Grade 1         | 723 (9.0)   | 987 (12.5)  | 610 (8.6)   | 855 (11.8)  | 562 (7.3)   | 1591 (20.8) | 581 (8.5)   | 1218 (17.3) |
| Grade 2         | 195 (2.4)   | 295 (3.7)   | 218 (3.1)   | 312 (4.3)   | 177 (2.3)   | 1274 (16.7) | 215 (3.1)   | 1445 (20.5) |
| Grade 3         | 17 (0.2)    | 23 (0.3)    | 21 (0.3)    | 37 (0.5)    | 18 (0.2)    | 261 (3.4)   | 26 (0.4)    | 514 (7.3)   |
| Grade 4         | 0           | 0           | 0           | 1 (<0.1)    | 0           | 0           | 0           | 0           |
| Nausea/vomiting | 456 (5.7)   | 504 (6.4)   | 619 (8.7)   | 758 (10.4)  | 390 (5.0)   | 1032 (13.5) | 551 (8.0)   | 1762 (25.0) |
| Grade 1         | 375 (4.7)   | 427 (5.4)   | 512 (7.2)   | 620 (8.5)   | 315 (4.1)   | 817 (10.7)  | 446 (6.5)   | 1277 (18.1) |
| Grade 2         | 74 (0.9)    | 73 (0.9)    | 101 (1.4)   | 132 (1.8)   | 69 (0.9)    | 210 (2.7)   | 100 (1.5)   | 468 (6.6)   |
| Grade 3         | 7 (<0.1)    | 4 (<0.1)    | 6 (<0.1)    | 6 (<0.1)    | 6 (<0.1)    | 5 (<0.1)    | 5 (<0.1)    | 16 (0.2)    |
| Chills          | 431 (5.4)   | 625 (7.9)   | 447 (6.3)   | 626 (8.6)   | 369 (4.8)   | 3173 (41.5) | 444 (6.5)   | 3327 (47.2) |
| Grade 1         | 353 (4.4)   | 475 (6.0)   | 353 (5.0)   | 463 (6.4)   | 294 (3.8)   | 1568 (20.5) | 335 (4.9)   | 1339 (19.0) |
| Grade 2         | 72 (0.9)    | 141 (1.8)   | 86 (1.2)    | 148 (2.0)   | 68 (0.9)    | 1522 (19.9) | 99 (1.4)    | 1880 (26.7) |
| Grade 3         | 6 (<0.1)    | 9 (0.1)     | 8 (0.1)     | 15 (0.2)    | 7 (<0.1)    | 83 (1.1)    | 10 (0.1)    | 108 (1.5)   |

n=Number of exposed participants who submitted any for the event; percentages are based on the number of exposed participants who submitted any data for the event in the solicited safety set. Any = Grade 1 or higher. Toxicity grade for Erythema (Redness) is defined as: G1 = 25 - 50 mm; G2 = 51 -100 mm; G3 = >100 mm. Toxicity grade for fever is defined as: G1 = 38 - 38.4 C; G2 = 38.5 - 38.9 C; G3 = 39 -40 C; G4 = >40 C. \*Localized axillary swelling or tenderness ipsilateral to the vaccination arm. Data cutoff: March 26, 2021.



**Table S9. Solicited Adverse Events by Severe Covid-19 Risk After 1<sup>st</sup> and 2<sup>nd</sup> Injections, Solicited Safety Set**

| n (%)                         | Injection 1       |                     |                    |                      | Injection 2       |                     |                    |                      |
|-------------------------------|-------------------|---------------------|--------------------|----------------------|-------------------|---------------------|--------------------|----------------------|
|                               | At Risk           |                     | Not at risk        |                      | At Risk           |                     | Not at risk        |                      |
|                               | Placebo<br>N=3454 | mRNA-1273<br>N=3439 | Placebo<br>N=11697 | mRNA-1273<br>N=11727 | Placebo<br>N=3323 | mRNA-1273<br>N=3362 | Placebo<br>N=11255 | mRNA-1273<br>N=11329 |
| Any solicited AE              | 1659 (48.0)       | 2925 (85.1)         | 5626 (48.1)        | 10392 (88.6)         | 1462 (44.0)       | 3001 (89.3)         | 4793 (42.6)        | 10555 (93.2)         |
| Grade 1                       | 1110 (32.1)       | 2060 (59.9)         | 4024 (34.4)        | 7269 (62.0)          | 996 (30.0)        | 1305 (38.8)         | 3350 (29.8)        | 3542 (31.3)          |
| Grade 2                       | 455 (13.2)        | 674 (19.6)          | 1327 (11.3)        | 2460 (21.0)          | 378 (11.4)        | 1127 (33.5)         | 1180 (10.5)        | 4673 (41.2)          |
| Grade 3                       | 94 (2.7)          | 190 (5.5)           | 269 (2.3)          | 659 (5.6)            | 86 (2.6)          | 566 (16.8)          | 262 (2.3)          | 2329 (20.6)          |
| Grade 4                       | 0                 | 1 (<0.1)            | 6 (<0.1)           | 4 (<0.1)             | 2 (<0.1)          | 3 (<0.1)            | 1 (<0.1)           | 11 (<0.1)            |
| Any Local AE                  | 700 (20.3)        | 2723 (79.2)         | 2309 (19.7)        | 10042 (85.7)         | 622 (18.7)        | 2852 (84.9)         | 2135 (19.0)        | 10177 (89.8)         |
| Grade 1                       | 647 (18.7)        | 2349 (68.3)         | 2195 (18.8)        | 8376 (71.4)          | 577 (17.4)        | 2016 (60.0)         | 2017 (17.9)        | 6773 (59.8)          |
| Grade 2                       | 27 (0.8)          | 268 (7.8)           | 62 (0.5)           | 1243 (10.6)          | 20 (0.6)          | 618 (18.4)          | 68 (0.6)           | 2599 (22.9)          |
| Grade 3                       | 26 (0.8)          | 106 (3.1)           | 52 (0.4)           | 423 (3.6)            | 25 (0.8)          | 218 (6.5)           | 50 (0.4)           | 805 (7.1)            |
| Local AE                      |                   |                     |                    |                      |                   |                     |                    |                      |
| Pain                          | 613 (17.8)        | 2709 (78.8)         | 2052 (17.5)        | 9979 (85.1)          | 552 (16.6)        | 2833 (84.3)         | 1934 (17.2)        | 10131 (89.4)         |
| Grade 1                       | 576 (16.7)        | 2408 (70.0)         | 1975 (16.9)        | 8577 (73.2)          | 518 (15.6)        | 2179 (64.9)         | 1866 (16.6)        | 7329 (64.7)          |
| Grade 2                       | 17 (0.5)          | 218 (6.3)           | 42 (0.4)           | 1069 (9.1)           | 18 (0.5)          | 528 (15.7)          | 43 (0.4)           | 2322 (20.5)          |
| Grade 3                       | 20 (0.6)          | 83 (2.4)            | 35 (0.3)           | 333 (2.8)            | 16 (0.5)          | 126 (3.8)           | 25 (0.2)           | 480 (4.2)            |
| Erythema                      | 21 (0.6)          | 104 (3.0)           | 56 (0.5)           | 341 (2.9)            | 15 (0.5)          | 285 (8.5)           | 53 (0.5)           | 989 (8.7)            |
| Grade 1                       | 16 (0.5)          | 70 (2.0)            | 41 (0.4)           | 211 (1.8)            | 9 (0.3)           | 101 (3.0)           | 39 (0.3)           | 355 (3.1)            |
| Grade 2                       | 2 (<0.1)          | 28 (0.8)            | 5 (<0.1)           | 94 (0.8)             | 1 (<0.1)          | 119 (3.5)           | 4 (<0.1)           | 412 (3.6)            |
| Grade 3                       | 3 (<0.1)          | 6 (0.2)             | 10 (<0.1)          | 36 (0.2)             | 5 (0.2)           | 65 (1.9)            | 10 (<0.1)          | 222 (2.0)            |
| Swelling                      | 21 (0.6)          | 196 (5.7)           | 44 (0.4)           | 739 (6.3)            | 19 (0.6)          | 431 (12.8)          | 41 (0.4)           | 1376 (12.1)          |
| Grade 1                       | 15 (0.4)          | 130 (3.8)           | 35 (0.3)           | 478 (4.1)            | 13 (0.4)          | 213 (6.3)           | 25 (0.2)           | 687 (6.1)            |
| Grade 2                       | 5 (0.1)           | 51 (1.5)            | 4 (<0.1)           | 194 (1.7)            | 3 (<0.1)          | 159 (4.7)           | 7 (<0.1)           | 493 (4.4)            |
| Grade 3                       | 1 (<0.1)          | 15 (0.4)            | 5 (<0.1)           | 67 (0.6)             | 3 (<0.1)          | 59 (1.8)            | 9 (<0.1)           | 196 (1.7)            |
| Axillary swelling/tenderness* | 188 (5.4)         | 337 (9.8)           | 534 (4.6)          | 1216 (10.4)          | 149 (4.5)         | 448 (13.3)          | 422 (3.7)          | 1644 (14.5)          |
| Grade 1                       | 172 (5.0)         | 304 (8.8)           | 496 (4.2)          | 1090 (9.3)           | 139 (4.2)         | 364 (10.8)          | 384 (3.4)          | 1371 (12.1)          |
| Grade 2                       | 9 (0.3)           | 16 (0.5)            | 18 (0.2)           | 94 (0.8)             | 5 (0.2)           | 61 (1.8)            | 23 (0.2)           | 228 (2.0)            |
| Grade 3                       | 7 (0.2)           | 17 (0.5)            | 20 (0.2)           | 32 (0.3)             | 5 (0.2)           | 23 (0.7)            | 15 (0.1)           | 45 (0.4)             |
| Any Systemic AE               | 1470 (42.6)       | 1900 (55.2)         | 4927 (42.1)        | 6416 (54.7)          | 1262 (38.0)       | 2416 (71.9)         | 4081 (36.3)        | 9262 (81.8)          |
| Grade 1                       | 952 (27.6)        | 1210 (35.2)         | 3382 (28.9)        | 4148 (35.4)          | 818 (24.6)        | 900 (26.8)          | 2701 (24.0)        | 2817 (24.9)          |
| Grade 2                       | 441 (12.8)        | 571 (16.6)          | 1305 (11.2)        | 1933 (16.5)          | 378 (11.4)        | 1064 (31.7)         | 1157 (10.3)        | 4547 (40.1)          |
| Grade 3                       | 77 (2.2)          | 118 (3.4)           | 234 (2.0)          | 331 (2.8)            | 64 (1.9)          | 449 (13.4)          | 222 (2.0)          | 1887 (16.7)          |
| Grade 4                       | 0                 | 1 (<0.1)            | 6 (<0.1)           | 4 (<0.1)             | 2 (<0.1)          | 3 (<0.1)            | 1 (<0.1)           | 11 (<0.1)            |
| Systemic AE                   |                   |                     |                    |                      |                   |                     |                    |                      |
| Fever                         | 7 (0.2)           | 23 (0.7)            | 37 (0.3)           | 89 (0.8)             | 10 (0.3)          | 390 (11.6)          | 33 (0.3)           | 1886 (16.7)          |
| Grade 1                       | 6 (0.2)           | 13 (0.4)            | 22 (0.2)           | 60 (0.5)             | 7 (0.2)           | 228 (6.8)           | 26 (0.2)           | 1135 (10.0)          |
| Grade 2                       | 1 (<0.1)          | 7 (0.2)             | 7 (<0.1)           | 17 (0.1)             | 1 (<0.1)          | 115 (3.4)           | 4 (<0.1)           | 582 (5.1)            |
| Grade 3                       | 0                 | 2 (<0.1)            | 2 (<0.1)           | 9 (<0.1)             | 0                 | 44 (1.3)            | 2 (<0.1)           | 159 (1.4)            |

|                 |            |             |             |             |            |             |             |             |
|-----------------|------------|-------------|-------------|-------------|------------|-------------|-------------|-------------|
| Grade 4         | 0          | 1 (<0.1)    | 6 (<0.1)    | 3 (<0.1)    | 2 (<0.1)   | 3 (<0.1)    | 1 (<0.1)    | 10 (<0.1)   |
| Headache        | 890 (25.8) | 1090 (31.7) | 3136 (26.8) | 3860 (32.9) | 769 (23.1) | 1697 (50.5) | 2658 (23.6) | 6940 (61.3) |
| Grade 1         | 718 (20.8) | 860 (25.0)  | 2579 (22.1) | 3087 (26.3) | 609 (18.3) | 1006 (29.9) | 2131 (18.9) | 3809 (33.6) |
| Grade 2         | 124 (3.6)  | 154 (4.5)   | 408 (3.5)   | 576 (4.9)   | 126 (3.8)  | 548 (16.3)  | 396 (3.5)   | 2608 (23.0) |
| Grade 3         | 48 (1.4)   | 76 (2.2)    | 149 (1.3)   | 197 (1.7)   | 34 (1.0)   | 143 (4.3)   | 131 (1.2)   | 523 (4.6)   |
| Fatigue         | 960 (27.8) | 1294 (37.6) | 3173 (27.1) | 4342 (37.0) | 809 (24.4) | 1914 (57.0) | 2609 (23.2) | 7693 (67.9) |
| Grade 1         | 597 (17.3) | 821 (23.9)  | 2108 (18.0) | 2764 (23.6) | 501 (15.1) | 728 (21.7)  | 1680 (14.9) | 2703 (23.9) |
| Grade 2         | 335 (9.7)  | 431 (12.5)  | 988 (8.4)   | 1468 (12.5) | 280 (8.4)  | 912 (27.2)  | 849 (7.5)   | 3831 (33.8) |
| Grade 3         | 28 (0.8)   | 42 (1.2)    | 77 (0.7)    | 109 (0.9)   | 28 (0.8)   | 274 (8.2)   | 80 (0.7)    | 1159 (10.2) |
| Grade 4         | 0          | 0           | 0           | 1 (<0.1)    | 0          | 0           | 0           | 0           |
| Myalgia         | 554 (16.0) | 815 (23.7)  | 1515 (13.0) | 2627 (22.4) | 482 (14.5) | 1670 (49.7) | 1342 (11.9) | 6859 (60.5) |
| Grade 1         | 411 (11.9) | 575 (16.7)  | 1149 (9.8)  | 1867 (15.9) | 344 (10.4) | 707 (21.0)  | 963 (8.6)   | 2535 (22.4) |
| Grade 2         | 133 (3.9)  | 215 (6.3)   | 329 (2.8)   | 694 (5.9)   | 127 (3.8)  | 743 (22.1)  | 338 (3.0)   | 3223 (28.5) |
| Grade 3         | 10 (0.3)   | 25 (0.7)    | 37 (0.3)    | 66 (0.6)    | 11 (0.3)   | 220 (6.5)   | 41 (0.4)    | 1101 (9.7)  |
| Arthralgia      | 514 (14.9) | 635 (18.5)  | 1270 (10.9) | 1875 (16.0) | 424 (12.8) | 1271 (37.8) | 1155 (10.3) | 5032 (44.4) |
| Grade 1         | 366 (10.6) | 439 (12.8)  | 967 (8.3)   | 1403 (12.0) | 310 (9.3)  | 613 (18.2)  | 833 (7.4)   | 2196 (19.4) |
| Grade 2         | 139 (4.0)  | 177 (5.1)   | 274 (2.3)   | 430 (3.7)   | 103 (3.1)  | 511 (15.2)  | 289 (2.6)   | 2208 (19.5) |
| Grade 3         | 9 (0.3)    | 19 (0.6)    | 29 (0.2)    | 41 (0.3)    | 11 (0.3)   | 147 (4.4)   | 33 (0.3)    | 628 (5.5)   |
| Grade 4         | 0          | 0           | 0           | 1 (<0.1)    | 0          | 0           | 0           | 0           |
| Nausea/vomiting | 289 (8.4)  | 312 (9.1)   | 786 (6.7)   | 950 (8.1)   | 269 (8.1)  | 547 (16.3)  | 672 (6.0)   | 2247 (19.8) |
| Grade 1         | 244 (7.1)  | 251 (7.3)   | 643 (5.5)   | 796 (6.8)   | 219 (6.6)  | 409 (12.2)  | 542 (4.8)   | 1685 (14.9) |
| Grade 2         | 44 (1.3)   | 56 (1.6)    | 131 (1.1)   | 149 (1.3)   | 48 (1.4)   | 129 (3.8)   | 121 (1.1)   | 549 (4.8)   |
| Grade 3         | 1 (<0.1)   | 5 (0.1)     | 12 (0.1)    | 5 (<0.1)    | 2 (<0.1)   | 9 (0.3)     | 9 (<0.1)    | 12 (0.1)    |
| Grade 4         | 0          | 0           | 0           | 0           | 0          | 0           | 0           | 1 (<0.1)    |
| Chills          | 222 (6.4)  | 276 (8.0)   | 656 (5.6)   | 975 (8.3)   | 191 (5.7)  | 1160 (34.5) | 622 (5.5)   | 5340 (47.1) |
| Grade 1         | 184 (5.3)  | 203 (5.9)   | 522 (4.5)   | 735 (6.3)   | 150 (4.5)  | 547 (16.3)  | 479 (4.3)   | 2360 (20.8) |
| Grade 2         | 36 (1.0)   | 64 (1.9)    | 122 (1.0)   | 225 (1.9)   | 38 (1.1)   | 577 (17.2)  | 129 (1.1)   | 2825 (24.9) |
| Grade 3         | 2 (<0.1)   | 9 (0.3)     | 12 (0.1)    | 15 (0.1)    | 3 (<0.1)   | 36 (1.1)    | 14 (0.1)    | 155 (1.4)   |

n=Number of exposed participants who submitted any for the event; percentages are based on the number of exposed participants who submitted any data for the event in the solicited safety set. At risk includes those ≥65 years and those <65 years who were considered at increased risk for severe Covid-19 illness having at least 1 of the following CDC-defined risk factors at screening: chronic lung disease (eg, emphysema and chronic bronchitis, idiopathic pulmonary fibrosis, and cystic fibrosis) or moderate to severe asthma, significant cardiac disease (eg, heart failure, coronary artery disease, congenital heart disease, cardiomyopathies, and pulmonary hypertension), severe obesity (body mass index ≥ 40 kg/m<sup>2</sup>), diabetes (Type 1, Type 2 or gestational), liver disease, Human Immunodeficiency Virus (HIV) infection. Not at risk includes those <65 years without risk factors. Any = Grade 1 or higher. Toxicity grade for Erythema (Redness) is defined as: G1 = 25 - 50 mm; G2 = 51 -100 mm; G3 = >100 mm. Toxicity grade for fever is defined as: G1 = 38 - 38.4 C; G2 = 38.5 - 38.9 C; G3 = 39 -40 C; G4 = >40 C. \*Localized axillary swelling or tenderness ipsilateral to the vaccination arm. Data cutoff: March 26, 2021.

**Table S10. Number of Days Reporting Solicited Adverse Events After 1<sup>st</sup> and 2nd Injections, Solicited Safety Set**

| Duration days                     | Vaccination 1      |                      |                  | Vaccination 2      |                      |                  |
|-----------------------------------|--------------------|----------------------|------------------|--------------------|----------------------|------------------|
|                                   | Placebo<br>N=15151 | mRNA-1273<br>N=15166 | Total<br>N=30317 | Placebo<br>N=14578 | mRNA-1273<br>N=14691 | Total<br>N=29269 |
| Any solicited (n)                 | 7285               | 13317                | 20602            | 6255               | 13556                | 19811            |
| Mean days (SD)                    | 3.3 (5.4)          | 3.5 (4.2)            | 3.4 (4.6)        | 3.7 (8.7)          | 4.2 (7.8)            | 4.0 (8.1)        |
| Any local (n)                     | 3009               | 12765                | 15774            | 2757               | 13029                | 15786            |
| Mean days (SD)                    | 2.0 (2.9)          | 2.7 (2.2)            | 2.5 (2.4)        | 2.2 (6.4)          | 3.2 (3.3)            | 3.0 (4.0)        |
| Pain (n)                          | 2665               | 12688                | 15353            | 2486               | 12964                | 15450            |
| Mean, days (SD)                   | 1.7 (2.3)          | 2.5 (1.6)            | 2.3 (1.8)        | 1.9 (4.9)          | 3.0 (2.5)            | 2.8 (3.0)        |
| Erythema (n)                      | 77                 | 445                  | 522              | 68                 | 1274                 | 1342             |
| Mean, days (SD)                   | 4.2 (6.2)          | 2.8 (4.0)            | 3.0 (4.4)        | 3.8 (5.3)          | 2.7 (2.7)            | 2.7 (2.9)        |
| Swelling (n)                      | 65                 | 935                  | 1000             | 60                 | 1807                 | 1867             |
| Mean, days (SD)                   | 6.8 (8.8)          | 2.2 (2.7)            | 2.5 (3.6)        | 4.2 (5.3)          | 2.5 (2.1)            | 2.5 (2.3)        |
| Axillary swelling/tenderness* (n) | 722                | 1553                 | 2275             | 571                | 2092                 | 2663             |
| Mean, days (SD)                   | 2.1 (2.9)          | 2.3 (3.3)            | 2.3 (3.2)        | 3.0 (11.5)         | 2.5 (5.2)            | 2.6 (7.0)        |
| Any Systemic AR                   | 6397               | 8316                 | 14713            | 5343               | 11678                | 17021            |
| Mean, days (SD)                   | 3.3 (5.5)          | 3.1 (4.8)            | 3.2 (5.1)        | 3.7 (8.7)          | 3.4 (7.9)            | 3.5 (8.2)        |
| Fever (n)                         | 44                 | 112                  | 156              | 43                 | 2276                 | 2319             |
| Mean, days (SD)                   | 1.4 (0.6)          | 1.3 (1.0)            | 1.3 (0.9)        | 1.4 (1.6)          | 1.1 (0.4)            | 1.1 (0.5)        |
| Headache (n)                      | 4026               | 4950                 | 8976             | 3427               | 8637                 | 12064            |
| Mean, days (SD)                   | 2.2 (2.8)          | 2.1 (2.4)            | 2.2 (2.6)        | 2.4 (5.0)          | 2.4 (4.8)            | 2.4 (4.9)        |
| Fatigue (n)                       | 4133               | 5636                 | 9769             | 3418               | 9607                 | 13025            |
| Mean, days (SD)                   | 2.9 (4.4)          | 2.8 (3.9)            | 2.8 (4.1)        | 3.3 (8.3)          | 2.8 (6.5)            | 2.9 (7.0)        |
| Myalgia (n)                       | 2069               | 3442                 | 5511             | 1824               | 8529                 | 10353            |
| Mean, days (SD)                   | 2.8 (3.9)          | 2.4 (3.6)            | 2.5 (3.7)        | 3.7 (9.8)          | 2.2 (4.2)            | 2.4 (5.7)        |
| Arthralgia (n)                    | 1784               | 2510                 | 4294             | 1579               | 6303                 | 7882             |
| Mean, days (SD)                   | 3.5 (7.5)          | 2.9 (6.7)            | 3.1 (7.0)        | 4.1 (10.0)         | 2.3 (4.7)            | 2.7 (6.2)        |
| Nausea/vomiting (n)               | 1075               | 1262                 | 2337             | 941                | 2794                 | 3735             |
| Mean, days (SD)                   | 1.8 (2.1)          | 1.7 (1.7)            | 1.7 (1.9)        | 2.0 (5.8)          | 1.7 (3.7)            | 1.8 (4.3)        |
| Chills (n)                        | 878                | 1251                 | 2129             | 813                | 6500                 | 7313             |
| Mean, days (SD)                   | 1.7 (1.9)          | 1.5 (1.7)            | 1.6 (1.8)        | 2.2 (7.4)          | 1.5 (2.3)            | 1.6 (3.3)        |

n = Number of exposed participants who reported the event on any day within 7 days of the first injection. Number of days is calculated as the days of the solicited adverse event reported within the 7 days of injection including the day of injection. If the solicited AR continued beyond 7 days, the consecutive days a solicited adverse reaction was reported after 7 days are included. \*Localized axillary swelling or tenderness ipsilateral to the vaccination arm. Data-cutoff date: March 26, 2021.

**Table S11. Solicited Adverse Events by SARS-CoV-2 Baseline Status and grade, 1st Injection, Solicited Safety Set**

| n (%)                         | Baseline SARS-CoV-2 negative |                      | Baseline SARS-CoV-2 positive |                    | Missing data    |                   |
|-------------------------------|------------------------------|----------------------|------------------------------|--------------------|-----------------|-------------------|
|                               | Placebo<br>N=14730           | mRNA-1273<br>N=14733 | Placebo<br>N=337             | mRNA-1273<br>N=346 | Placebo<br>N=84 | mRNA-1273<br>N=87 |
| Any solicited AE              | 7105 (48.2)                  | 12976 (88.1)         | 138 (40.9)                   | 265 (76.6)         | 42 (50.0)       | 76 (87.4)         |
| Grade 1                       | 5015 (34.0)                  | 9136 (62.0)          | 83 (24.6)                    | 137 (39.6)         | 36 (42.9)       | 56 (64.4)         |
| Grade 2                       | 1736 (11.8)                  | 3022 (20.5)          | 41 (12.2)                    | 98 (28.3)          | 5 (6.0)         | 14 (16.1)         |
| Grade 3                       | 349 (2.4)                    | 814 (5.5)            | 13 (3.9)                     | 29 (8.4)           | 1 (1.2)         | 6 (6.9)           |
| Grade 4                       | 5 (<0.1)                     | 4 (<0.1)             | 1 (0.3)                      | 1 (0.3)            | 0               | 0                 |
| Any Local AE                  | 2934 (19.9)                  | 12442 (84.5)         | 60 (17.8)                    | 250 (72.3)         | 15 (17.9)       | 73 (83.9)         |
| Grade 1                       | 2771 (18.8)                  | 10481 (71.2)         | 56 (16.6)                    | 180 (52.0)         | 15 (17.9)       | 64 (73.6)         |
| Grade 2                       | 88 (0.6)                     | 1449 (9.8)           | 1 (0.3)                      | 56 (16.2)          | 0               | 6 (6.9)           |
| Grade 3                       | 75 (0.5)                     | 512 (3.5)            | 3 (0.9)                      | 14 (4.0)           | 0               | 3 (3.4)           |
| Local AE                      |                              |                      |                              |                    |                 |                   |
| Pain                          | 2596 (17.6)                  | 12369 (84.0)         | 56 (16.6)                    | 247 (71.4)         | 13 (15.5)       | 72 (82.8)         |
| Grade 1                       | 2484 (16.9)                  | 10735 (72.9)         | 54 (16.0)                    | 184 (53.2)         | 13 (15.5)       | 66 (75.9)         |
| Grade 2                       | 58 (0.4)                     | 1232 (8.4)           | 1 (0.3)                      | 52 (15.0)          | 0               | 3 (3.4)           |
| Grade 3                       | 54 (0.4)                     | 402 (2.7)            | 1 (0.3)                      | 11 (3.2)           | 0               | 3 (3.4)           |
| Erythema                      | 74 (0.5)                     | 429 (2.9)            | 3 (0.9)                      | 10 (2.9)           | 0               | 6 (6.9)           |
| Grade 1                       | 56 (0.4)                     | 272 (1.8)            | 1 (0.3)                      | 6 (1.7)            | 0               | 3 (3.4)           |
| Grade 2                       | 7 (<0.1)                     | 117 (0.8)            | 0                            | 2 (0.6)            | 0               | 3 (3.4)           |
| Grade 3                       | 11 (<0.1)                    | 40 (0.3)             | 2 (0.6)                      | 2 (0.6)            | 0               | 0                 |
| Swelling                      | 63 (0.4)                     | 910 (6.2)            | 2 (0.6)                      | 19 (5.5)           | 0               | 6 (6.9)           |
| Grade 1                       | 48 (0.3)                     | 593 (4.0)            | 2 (0.6)                      | 10 (2.9)           | 0               | 5 (5.7)           |
| Grade 2                       | 9 (<0.1)                     | 236 (1.6)            | 0                            | 8 (2.3)            | 0               | 1 (1.1)           |
| Grade 3                       | 6 (<0.1)                     | 81 (0.5)             | 0                            | 1 (0.3)            | 0               | 0                 |
| Axillary swelling/tenderness* | 701 (4.8)                    | 1487 (10.1)          | 18 (5.3)                     | 56 (16.2)          | 3 (3.6)         | 10 (11.5)         |
| Grade 1                       | 648 (4.4)                    | 1344 (9.1)           | 17 (5.0)                     | 40 (11.6)          | 3 (3.6)         | 10 (11.5)         |
| Grade 2                       | 27 (0.2)                     | 98 (0.7)             | 0                            | 12 (3.5)           | 0               | 0                 |
| Grade 3                       | 26 (0.2)                     | 45 (0.3)             | 1 (0.3)                      | 4 (1.2)            | 0               | 0                 |
| Any Systemic AE               | 6239 (42.4)                  | 8053 (54.7)          | 122 (36.2)                   | 214 (61.8)         | 36 (42.9)       | 49 (56.3)         |
| Grade 1                       | 4234 (28.7)                  | 5214 (35.4)          | 70 (20.8)                    | 108 (31.2)         | 30 (35.7)       | 36 (41.4)         |
| Grade 2                       | 1701 (11.5)                  | 2412 (16.4)          | 40 (11.9)                    | 82 (23.7)          | 5 (6.0)         | 10 (11.5)         |
| Grade 3                       | 299 (2.0)                    | 423 (2.9)            | 11 (3.3)                     | 23 (6.6)           | 1 (1.2)         | 3 (3.4)           |
| Grade 4                       | 5 (<0.1)                     | 4 (<0.1)             | 1 (0.3)                      | 1 (0.3)            | 0               | 0                 |
| Systemic AE                   |                              |                      |                              |                    |                 |                   |
| Fever                         | 38 (0.3)                     | 78 (0.5)             | 6 (1.8)                      | 33 (9.5)           | 0               | 1 (1.2)           |
| Grade 1                       | 25 (0.2)                     | 52 (0.4)             | 3 (0.9)                      | 20 (5.8)           | 0               | 1 (1.2)           |
| Grade 2                       | 6 (<0.1)                     | 14 (<0.1)            | 2 (0.6)                      | 10 (2.9)           | 0               | 0                 |
| Grade 3                       | 2 (<0.1)                     | 9 (<0.1)             | 0                            | 2 (0.6)            | 0               | 0                 |
| Grade 4                       | 5 (<0.1)                     | 3 (<0.1)             | 1 (0.3)                      | 1 (0.3)            | 0               | 0                 |
| Headache                      | 3917 (26.6)                  | 4787 (32.5)          | 83 (24.6)                    | 134 (38.7)         | 26 (31.0)       | 29 (33.3)         |
| Grade 1                       | 3214 (21.8)                  | 3833 (26.0)          | 60 (17.8)                    | 89 (25.7)          | 23 (27.4)       | 25 (28.7)         |
| Grade 2                       | 514 (3.5)                    | 695 (4.7)            | 16 (4.7)                     | 33 (9.5)           | 2 (2.4)         | 2 (2.3)           |

|                                                                                                                                                                                                                                                                                                                                                                                                                                                                                                                                                                                                                           |             |             |           |            |           |           |
|---------------------------------------------------------------------------------------------------------------------------------------------------------------------------------------------------------------------------------------------------------------------------------------------------------------------------------------------------------------------------------------------------------------------------------------------------------------------------------------------------------------------------------------------------------------------------------------------------------------------------|-------------|-------------|-----------|------------|-----------|-----------|
| Grade 3                                                                                                                                                                                                                                                                                                                                                                                                                                                                                                                                                                                                                   | 189 (1.3)   | 259 (1.8)   | 7 (2.1)   | 12 (3.5)   | 1 (1.2)   | 2 (2.3)   |
| Fatigue                                                                                                                                                                                                                                                                                                                                                                                                                                                                                                                                                                                                                   | 4038 (27.4) | 5466 (37.1) | 72 (21.4) | 138 (39.9) | 23 (27.4) | 32 (36.8) |
| Grade 1                                                                                                                                                                                                                                                                                                                                                                                                                                                                                                                                                                                                                   | 2646 (18.0) | 3490 (23.7) | 40 (11.9) | 71 (20.5)  | 19 (22.6) | 24 (27.6) |
| Grade 2                                                                                                                                                                                                                                                                                                                                                                                                                                                                                                                                                                                                                   | 1292 (8.8)  | 1834 (12.5) | 28 (8.3)  | 57 (16.5)  | 3 (3.6)   | 8 (9.2)   |
| Grade 3                                                                                                                                                                                                                                                                                                                                                                                                                                                                                                                                                                                                                   | 100 (0.7)   | 141 (1.0)   | 4 (1.2)   | 10 (2.9)   | 1 (1.2)   | 0         |
| Grade 4                                                                                                                                                                                                                                                                                                                                                                                                                                                                                                                                                                                                                   | 0           | 1 (<0.1)    | 0         | 0          | 0         | 0         |
| Myalgia                                                                                                                                                                                                                                                                                                                                                                                                                                                                                                                                                                                                                   | 2011 (13.7) | 3295 (22.4) | 47 (13.9) | 128 (37.0) | 11 (13.1) | 19 (21.8) |
| Grade 1                                                                                                                                                                                                                                                                                                                                                                                                                                                                                                                                                                                                                   | 1524 (10.3) | 2355 (16.0) | 27 (8.0)  | 71 (20.5)  | 9 (10.7)  | 16 (18.4) |
| Grade 2                                                                                                                                                                                                                                                                                                                                                                                                                                                                                                                                                                                                                   | 443 (3.0)   | 857 (5.8)   | 18 (5.3)  | 50 (14.5)  | 1 (1.2)   | 2 (2.3)   |
| Grade 3                                                                                                                                                                                                                                                                                                                                                                                                                                                                                                                                                                                                                   | 44 (0.3)    | 83 (0.6)    | 2 (0.6)   | 7 (2.0)    | 1 (1.2)   | 1 (1.1)   |
| Arthralgia                                                                                                                                                                                                                                                                                                                                                                                                                                                                                                                                                                                                                | 1735 (11.8) | 2406 (16.3) | 40 (11.9) | 88 (25.4)  | 9 (10.7)  | 16 (18.4) |
| Grade 1                                                                                                                                                                                                                                                                                                                                                                                                                                                                                                                                                                                                                   | 1305 (8.9)  | 1776 (12.1) | 21 (6.2)  | 54 (15.6)  | 7 (8.3)   | 12 (13.8) |
| Grade 2                                                                                                                                                                                                                                                                                                                                                                                                                                                                                                                                                                                                                   | 395 (2.7)   | 574 (3.9)   | 17 (5.0)  | 29 (8.4)   | 1 (1.2)   | 4 (4.6)   |
| Grade 3                                                                                                                                                                                                                                                                                                                                                                                                                                                                                                                                                                                                                   | 35 (0.2)    | 55 (0.4)    | 2 (0.6)   | 5 (1.4)    | 1 (1.2)   | 0         |
| Grade 4                                                                                                                                                                                                                                                                                                                                                                                                                                                                                                                                                                                                                   | 0           | 1 (<0.1)    | 0         | 0          | 0         | 0         |
| Nausea/vomiting                                                                                                                                                                                                                                                                                                                                                                                                                                                                                                                                                                                                           | 1044 (7.1)  | 1210 (8.2)  | 25 (7.4)  | 43 (12.4)  | 6 (7.1)   | 9 (10.3)  |
| Grade 1                                                                                                                                                                                                                                                                                                                                                                                                                                                                                                                                                                                                                   | 866 (5.9)   | 1009 (6.9)  | 17 (5.0)  | 30 (8.7)   | 4 (4.8)   | 8 (9.2)   |
| Grade 2                                                                                                                                                                                                                                                                                                                                                                                                                                                                                                                                                                                                                   | 165 (1.1)   | 191 (1.3)   | 8 (2.4)   | 13 (3.8)   | 2 (2.4)   | 1 (1.1)   |
| Grade 3                                                                                                                                                                                                                                                                                                                                                                                                                                                                                                                                                                                                                   | 13 (<0.1)   | 10 (<0.1)   | 0         | 0          | 0         | 0         |
| Chills                                                                                                                                                                                                                                                                                                                                                                                                                                                                                                                                                                                                                    | 846 (5.7)   | 1162 (7.9)  | 27 (8.0)  | 81 (23.4)  | 5 (6.0)   | 8 (9.2)   |
| Grade 1                                                                                                                                                                                                                                                                                                                                                                                                                                                                                                                                                                                                                   | 684 (4.6)   | 891 (6.0)   | 17 (5.0)  | 43 (12.4)  | 5 (6.0)   | 4 (4.6)   |
| Grade 2                                                                                                                                                                                                                                                                                                                                                                                                                                                                                                                                                                                                                   | 149 (1.0)   | 250 (1.7)   | 9 (2.7)   | 35 (10.1)  | 0         | 4 (4.6)   |
| Grade 3                                                                                                                                                                                                                                                                                                                                                                                                                                                                                                                                                                                                                   | 13 (<0.1)   | 21 (0.1)    | 1 (0.3)   | 3 (0.9)    | 0         | 0         |
| CI = Confidence intervals. N1 = Number of exposed participants who submitted any data for the event. Any = Grade 1 or higher. Percentages are based on the number of exposed participants who submitted any data for the event. 95% CI is calculated using the Clopper-Pearson method. Toxicity grade for Erythema (Redness) is defined as: G1 = 25 — 50 mm; G2 = 51 — 100 mm; G3 = > 100 mm. Toxicity grade for Fever is defined as: G1 = 38 — 38.4 C; G2 = 38.5 — 38.9 C; G3 = 39 — 40 C; G4 = > 40 C. *Localized axillary swelling or tenderness ipsilateral to the vaccination arm. Data-cutoff date: March 26, 2021. |             |             |           |            |           |           |

**Table S12. Solicited Adverse Events by SARS-CoV-2 Baseline Status and Grade, 2nd Injection, Solicited Safety Set**

| n (%)                         | Baseline SARS-CoV-2 negative |                      | Baseline SARS-CoV-2 positive |                    | Missing data    |                   |
|-------------------------------|------------------------------|----------------------|------------------------------|--------------------|-----------------|-------------------|
|                               | Placebo<br>N=14267           | mRNA-1273<br>N=14378 | Placebo<br>N=233             | mRNA-1273<br>N=232 | Placebo<br>N=78 | mRNA-1273<br>N=81 |
| Any solicited AE              | 6141 (43.0)                  | 13294 (92.5)         | 82 (35.2)                    | 187 (80.6)         | 32 (41.0)       | 75 (92.6)         |
| Grade 1                       | 4269 (29.9)                  | 4739 (33.0)          | 52 (22.3)                    | 90 (38.8)          | 25 (32.1)       | 18 (22.2)         |
| Grade 2                       | 1524 (10.7)                  | 5692 (39.6)          | 27 (11.6)                    | 68 (29.3)          | 7 (9.0)         | 40 (49.4)         |
| Grade 3                       | 345 (2.4)                    | 2849 (19.8)          | 3 (1.3)                      | 29 (12.5)          | 0               | 17 (21.0)         |
| Grade 4                       | 3 (<0.1)                     | 14 (<0.1)            | 0                            | 0                  | 0               | 0                 |
| Any Local AE                  | 2699 (18.9)                  | 12783 (88.9)         | 42 (18.1)                    | 172 (74.1)         | 16 (20.5)       | 74 (91.4)         |
| Grade 1                       | 2543 (17.8)                  | 8620 (60.0)          | 35 (15.1)                    | 125 (53.9)         | 16 (20.5)       | 44 (54.3)         |
| Grade 2                       | 83 (0.6)                     | 3160 (22.0)          | 5 (2.2)                      | 36 (15.5)          | 0               | 21 (25.9)         |
| Grade 3                       | 73 (0.5)                     | 1003 (7.0)           | 2 (0.9)                      | 11 (4.7)           | 0               | 9 (11.1)          |
| Local AR                      |                              |                      |                              |                    |                 |                   |
| Pain                          | 2435 (17.1)                  | 12722 (88.5)         | 36 (15.5)                    | 169 (72.8)         | 15 (19.2)       | 73 (90.1)         |
| Grade 1                       | 2337 (16.4)                  | 9330 (64.9)          | 32 (13.8)                    | 126 (54.3)         | 15 (19.2)       | 52 (64.2)         |
| Grade 2                       | 58 (0.4)                     | 2797 (19.5)          | 3 (1.3)                      | 36 (15.5)          | 0               | 17 (21.0)         |
| Grade 3                       | 40 (0.3)                     | 595 (4.1)            | 1 (0.4)                      | 7 (3.0)            | 0               | 4 (4.9)           |
| Erythema                      | 66 (0.5)                     | 1259 (8.8)           | 1 (0.4)                      | 9 (3.9)            | 1 (1.3)         | 6 (7.4)           |
| Grade 1                       | 47 (0.3)                     | 452 (3.1)            | 0                            | 2 (0.9)            | 1 (1.3)         | 2 (2.5)           |
| Grade 2                       | 5 (<0.1)                     | 527 (3.7)            | 0                            | 4 (1.7)            | 0               | 0                 |
| Grade 3                       | 14 (<0.1)                    | 280 (1.9)            | 1 (0.4)                      | 3 (1.3)            | 0               | 4 (4.9)           |
| Swelling                      | 59 (0.4)                     | 1783 (12.4)          | 1 (0.4)                      | 11 (4.7)           | 0               | 13 (16.0)         |
| Grade 1                       | 38 (0.3)                     | 890 (6.2)            | 0                            | 4 (1.7)            | 0               | 6 (7.4)           |
| Grade 2                       | 9 (<0.1)                     | 642 (4.5)            | 1 (0.4)                      | 5 (2.2)            | 0               | 5 (6.2)           |
| Grade 3                       | 12 (<0.1)                    | 251 (1.7)            | 0                            | 2 (0.9)            | 0               | 2 (2.5)           |
| Axillary swelling/tenderness* | 557 (3.9)                    | 2047 (14.2)          | 11 (4.7)                     | 32 (13.8)          | 3 (3.8)         | 13 (16.0)         |
| Grade 1                       | 512 (3.6)                    | 1704 (11.9)          | 8 (3.4)                      | 22 (9.5)           | 3 (3.8)         | 9 (11.1)          |
| Grade 2                       | 25 (0.2)                     | 277 (1.9)            | 3 (1.3)                      | 8 (3.4)            | 0               | 4 (4.9)           |
| Grade 3                       | 20 (0.1)                     | 66 (0.5)             | 0                            | 2 (0.9)            | 0               | 0                 |
| Any Systemic AE               | 5241 (36.7)                  | 11459 (79.7)         | 73 (31.3)                    | 152 (65.5)         | 29 (37.2)       | 67 (82.7)         |
| Grade 1                       | 3453 (24.2)                  | 3642 (25.3)          | 44 (18.9)                    | 61 (26.3)          | 22 (28.2)       | 14 (17.3)         |
| Grade 2                       | 1500 (10.5)                  | 5498 (38.2)          | 28 (12.0)                    | 70 (30.2)          | 7 (9.0)         | 43 (53.1)         |
| Grade 3                       | 285 (2.0)                    | 2305 (16.0)          | 1 (0.4)                      | 21 (9.1)           | 0               | 10 (12.3)         |
| Grade 4                       | 3 (<0.1)                     | 14 (<0.1)            | 0                            | 0                  | 0               | 0                 |
| Systemic AE                   |                              |                      |                              |                    |                 |                   |
| Fever                         | 42 (0.3)                     | 2235 (15.6)          | 1 (0.4)                      | 31 (13.4)          | 0               | 10 (12.5)         |
| Grade 1                       | 32 (0.2)                     | 1340 (9.3)           | 1 (0.4)                      | 20 (8.6)           | 0               | 3 (3.8)           |
| Grade 2                       | 5 (<0.1)                     | 682 (4.7)            | 0                            | 9 (3.9)            | 0               | 6 (7.5)           |
| Grade 3                       | 2 (<0.1)                     | 200 (1.4)            | 0                            | 2 (0.9)            | 0               | 1 (1.3)           |
| Grade 4                       | 3 (<0.1)                     | 13 (<0.1)            | 0                            | 0                  | 0               | 0                 |
| Headache                      | 3363 (23.6)                  | 8488 (59.1)          | 43 (18.5)                    | 98 (42.2)          | 21 (26.9)       | 51 (63.0)         |
| Grade 1                       | 2688 (18.8)                  | 4725 (32.9)          | 35 (15.1)                    | 61 (26.3)          | 17 (21.8)       | 29 (35.8)         |

|                 |             |             |           |            |           |           |
|-----------------|-------------|-------------|-----------|------------|-----------|-----------|
| Grade 2         | 510 (3.6)   | 3105 (21.6) | 8 (3.4)   | 31 (13.4)  | 4 (5.1)   | 20 (24.7) |
| Grade 3         | 165 (1.2)   | 658 (4.6)   | 0         | 6 (2.6)    | 0         | 2 (2.5)   |
| Fatigue         | 3344 (23.4) | 9446 (65.7) | 54 (23.3) | 106 (45.7) | 20 (25.6) | 55 (67.9) |
| Grade 1         | 2134 (15.0) | 3375 (23.5) | 31 (13.4) | 42 (18.1)  | 16 (20.5) | 14 (17.3) |
| Grade 2         | 1103 (7.7)  | 4655 (32.4) | 22 (9.5)  | 52 (22.4)  | 4 (5.1)   | 36 (44.4) |
| Grade 3         | 107 (0.8)   | 1416 (9.9)  | 1 (0.4)   | 12 (5.2)   | 0         | 5 (6.2)   |
| Myalgia         | 1775 (12.4) | 8357 (58.1) | 34 (14.7) | 117 (50.4) | 15 (19.2) | 55 (67.9) |
| Grade 1         | 1271 (8.9)  | 3166 (22.0) | 22 (9.5)  | 60 (25.9)  | 14 (17.9) | 16 (19.8) |
| Grade 2         | 452 (3.2)   | 3886 (27.0) | 12 (5.2)  | 46 (19.8)  | 1 (1.3)   | 34 (42.0) |
| Grade 3         | 52 (0.4)    | 1305 (9.1)  | 0         | 11 (4.7)   | 0         | 5 (6.2)   |
| Arthralgia      | 1543 (10.8) | 6181 (43.0) | 26 (11.2) | 77 (33.2)  | 10 (12.8) | 45 (55.6) |
| Grade 1         | 1115 (7.8)  | 2758 (19.2) | 19 (8.2)  | 37 (15.9)  | 9 (11.5)  | 14 (17.3) |
| Grade 2         | 384 (2.7)   | 2655 (18.5) | 7 (3.0)   | 36 (15.5)  | 1 (1.3)   | 28 (34.6) |
| Grade 3         | 44 (0.3)    | 768 (5.3)   | 0         | 4 (1.7)    | 0         | 3 (3.7)   |
| Nausea/vomiting | 922 (6.5)   | 2741 (19.1) | 13 (5.6)  | 33 (14.2)  | 6 (7.7)   | 20 (24.7) |
| Grade 1         | 747 (5.2)   | 2052 (14.3) | 10 (4.3)  | 25 (10.8)  | 4 (5.1)   | 17 (21.0) |
| Grade 2         | 164 (1.1)   | 668 (4.6)   | 3 (1.3)   | 7 (3.0)    | 2 (2.6)   | 3 (3.7)   |
| Grade 3         | 11 (<0.1)   | 20 (0.1)    | 0         | 1 (0.4)    | 0         | 0         |
| Grade 4         | 0           | 1 (<0.1)    | 0         | 0          | 0         | 0         |
| Chills          | 790 (5.5)   | 6384 (44.4) | 19 (8.2)  | 80 (34.5)  | 4 (5.1)   | 36 (44.4) |
| Grade 1         | 610 (4.3)   | 2854 (19.9) | 16 (6.9)  | 40 (17.2)  | 3 (3.8)   | 13 (16.0) |
| Grade 2         | 163 (1.1)   | 3340 (23.2) | 3 (1.3)   | 40 (17.2)  | 1 (1.3)   | 22 (27.2) |
| Grade 3         | 17 (0.1)    | 190 (1.3)   | 0         | 0          | 0         | 1 (1.2)   |

CI = Confidence intervals. N1 = Number of exposed participants who submitted any data for the event. Any = Grade 1 or higher. Percentages are based on the number of exposed participants who submitted any data for the event. 95% CI is calculated using the Clopper-Pearson method. Toxicity grade for Erythema (Redness) is defined as: G1 = 25 — 50 mm; G2 = 51 — 100 mm; G3 = > 100 mm. Toxicity grade for Fever is defined as: G1 = 38 — 38.4 C; G2 = 38.5 — 38.9 C; G3 = 39 — 40 C; G4 = >40 C. \*Localized axillary swelling or tenderness ipsilateral to the vaccination arm. Data-cutoff date: March 26, 2021.

**Table S13. Solicited Adverse Events Occurring after Day 8 or Beyond Post-Injection, Safety Set**

| Category                                                                                                                        | 1 <sup>st</sup> injection |                      | 2 <sup>nd</sup> injection |                      |
|---------------------------------------------------------------------------------------------------------------------------------|---------------------------|----------------------|---------------------------|----------------------|
|                                                                                                                                 | Placebo<br>N=15151        | mRNA-1273<br>N=15166 | Placebo<br>N=14578        | mRNA-1273<br>N=14691 |
| Any local AE occurring at day 8 or beyond                                                                                       | 158<br>(1.0)              | 514<br>(3.4)         | 199<br>(1.4)              | 356<br>(2.4)         |
| Started within 7 days of injection and continued beyond 7 days                                                                  | 130<br>(0.9)              | 351<br>(2.3)         | 122<br>(0.8)              | 308<br>(2.1)         |
| Solicited AE within 7 days, and re-started on day 8 or afterwards                                                               | 10<br>(<0.1)              | 83<br>(0.5)          | 20<br>(0.1)               | 38<br>(0.3)          |
| No solicited AE within 7 days and AE started on day 8 or afterwards                                                             | 18<br>(0.1)               | 80<br>(0.5)          | 57<br>(0.4)               | 10<br>(<0.1)         |
| Pain at day 8 or beyond                                                                                                         | 70<br>(0.5)               | 156<br>(1.0)         | 116<br>(0.8)              | 186<br>(1.3)         |
| Started within 7 days of the injection and continued beyond 7 days                                                              | 56<br>(0.4)               | 102<br>(0.7)         | 58<br>(0.4)               | 155<br>(1.1)         |
| Solicited AE within 7 days, and re-started on day 8 or afterwards                                                               | 6<br>(<0.1)               | 53<br>(0.3)          | 17<br>(0.1)               | 31<br>(0.2)          |
| No solicited AE within 7 days, and AE started on day 8 or afterwards                                                            | 8<br>(<0.1)               | 1<br>(<0.1)          | 41<br>(0.3)               | 0                    |
| Erythema (redness) occurred at day 8 or beyond                                                                                  | 27<br>(0.2)               | 117<br>(0.8)         | 21<br>(0.1)               | 78<br>(0.5)          |
| Started within 7 days of the injection and continued beyond 7 days                                                              | 20<br>(0.1)               | 34<br>(0.2)          | 13<br>(<0.1)              | 70<br>(0.5)          |
| Solicited AE within 7 days, and re-started on day 8 or afterwards                                                               | 0                         | 15<br>(<0.1)         | 0                         | 2<br>(<0.1)          |
| No solicited AE within 7 days, and AE started on day 8 or afterwards                                                            | 7<br>(<0.1)               | 68<br>(0.4)          | 8<br>(<0.1)               | 6<br>(<0.1)          |
| Swelling (hardness) occurred at day 8 or beyond                                                                                 | 25<br>(0.2)               | 88<br>(0.6)          | 22<br>(0.2)               | 76<br>(0.5)          |
| Started within 7 days of the injection and continued beyond 7 days                                                              | 22<br>(0.1)               | 33<br>(0.2)          | 16<br>(0.1)               | 70<br>(0.5)          |
| Solicited AE within 7 days, and re-started on day 8 or afterwards                                                               | 0                         | 19<br>(0.1)          | 0                         | 2<br>(<0.1)          |
| No solicited AE within 7 days, and AE started on day 8 or afterwards                                                            | 3<br>(<0.1)               | 36<br>(0.2)          | 6<br>(<0.1)               | 4<br>(<0.1)          |
| Axillary swelling or tenderness occurred at day 8 or beyond                                                                     | 62<br>(0.4)               | 243<br>(1.6)         | 57<br>(0.4)               | 101<br>(0.7)         |
| Started within 7 days of the injection and continued beyond 7 days                                                              | 54<br>(0.4)               | 223<br>(1.5)         | 48<br>(0.3)               | 90<br>(0.6)          |
| Solicited AE within 7 days, and re-started on day 8 or afterwards                                                               | 5<br>(<0.1)               | 12<br>(<0.1)         | 4<br>(<0.1)               | 7<br>(<0.1)          |
| No solicited AE within 7 days, and AE started on day 8 or afterwards                                                            | 3<br>(<0.1)               | 8<br>(<0.1)          | 5<br>(<0.1)               | 4<br>(<0.1)          |
| Participants with solicited adverse events on day 8 or beyond, independent of the start date. Data-cutoff date:: March 26, 2021 |                           |                      |                           |                      |



**Table S14. Summary of Unsolicited AEs Overall and Age Groups Up to 28 days After Any Injection, Safety Set**

| Unsolicited Adverse Event<br>n (%)              | Overall Safety Set |                      | ≥18-<65 years        |                        | ≥65 years         |                     |
|-------------------------------------------------|--------------------|----------------------|----------------------|------------------------|-------------------|---------------------|
|                                                 | Placebo<br>N=15162 | mRNA-1273<br>N=15184 | Placebo<br>(N=11411) | mRNA-1273<br>(N=11415) | Placebo<br>N=3750 | mRNA-1273<br>N=3770 |
| Regardless of relationship to study vaccination |                    |                      |                      |                        |                   |                     |
| All                                             | 4338 (28.6)        | 4752 (31.3)          | 3275 (28.7)          | 3515 (30.8)            | 1063 (28.3)       | 1237 (32.8)         |
| Serious                                         | 104 (0.7)          | 98 (0.6)             | 54 (0.5)             | 59 (0.5)               | 50 (1.3)          | 39 (1.0)            |
| Fatal                                           | 2 (<0.1)           | 2 (<0.1)             | 1 (<0.1)             | 1 (<0.1)               | 1 (<0.1)          | 1 (<0.1)            |
| Medically-attended                              | 1940 (12.8)        | 1819 (12.0)          | 1419 (12.4)          | 1311 (11.5)            | 521 (13.9)        | 508 (13.5)          |
| Leading to discontinuation from study vaccine*  | 92 (0.6)           | 61 (0.4)             | 70 (0.6)             | 49 (0.4)               | 22 (0.6)          | 12 (0.3)            |
| Leading to discontinuation from study†          | 6 (<0.1)           | 9 (<0.1)             | 3 (<0.1)             | 7 (<0.1)               | 3 (<0.1)          | 2 (<0.1)            |
| Severe                                          | 233 (1.5)          | 258 (1.7)            | 152 (1.3)            | 177 (1.6)              | 81 (2.2)          | 81 (2.1)            |
| Related to study vaccination                    |                    |                      |                      |                        |                   |                     |
| All                                             | 1236 (8.2)         | 2067 (13.6)          | 945 (8.3)            | 1580 (13.8)            | 291 (7.8)         | 487 (12.9)          |
| Serious                                         | 3 (<0.1)           | 8 (<0.1)             | 2 (<0.1)             | 6 (<0.1)               | 1 (<0.1)          | 2 (<0.1)            |
| Fatal                                           | 0                  | 0                    | 0                    | 0                      | 0                 | 0                   |
| Medically-attended                              | 95 (0.6)           | 198 (1.3)            | 78 (0.7)             | 161 (1.4)              | 17 (0.5)          | 37 (1.0)            |
| Leading to discontinuation from study vaccine*  | 14 (<0.1)          | 20 (0.1)             | 8 (<0.1)             | 17 (0.1)               | 6 (0.2)           | 3 (<0.1)            |
| Leading to discontinuation from study†          | 0                  | 1 (<0.1)             | 0                    | 1 (<0.1)               | 0                 | 0                   |
| Severe                                          | 31 (0.2)           | 83 (0.5)             | 20 (0.2)             | 59 (0.5)               | 11 (0.3)          | 24 (0.6)            |

An adverse event is defined as any event not present before exposure to study vaccination or any event already present that worsens in intensity or frequency after exposure. Percentages are based on overall safety set. \*AEs leading to study discontinuation 28 days after first dose. †AEs leading to discontinuation from study after either dose. Data-cutoff date: March 26, 2021.

**Table S15. Summary Unsolicited AEs Reported by  $\geq 1\%$  of Participants in Any Treatment Group up to 28 Days After Any Injection, Safety Set**

| <b>System Organ Class<br/>Preferred Term<br/>n (%)</b> | <b>Placebo<br/>(N=15162)</b> | <b>mRNA-1273<br/>(N=15184)</b> |
|--------------------------------------------------------|------------------------------|--------------------------------|
| Number of participants reporting unsolicited AEs       | 4338 (28.6)                  | 4748 (31.3)                    |
| Number of unsolicited AEs                              | 8599                         | 9533                           |
| Nervous system disorders                               | 881 (5.8)                    | 1008 (6.6)                     |
| Headache                                               | 687(4.5)                     | 744 (4.9)                      |
| Respiratory, thoracic and mediastinal disorders        | 667 (4.4)                    | 603 (4.0)                      |
| Cough                                                  | 165 (1.1)                    | 177 (1.2)                      |
| Oropharyngeal pain                                     | 232 (1.5)                    | 158 (1.0)                      |
| Nasal congestion                                       | 165 (1.1)                    | 155 (1.0)                      |
| Musculoskeletal and connective tissue disorders        | 1017 (6.7)                   | 1007 (6.6)                     |
| Arthralgia                                             | 389 (2.6)                    | 391 (2.6)                      |
| Myalgia                                                | 388 (2.6)                    | 387 (2.5)                      |
| General disorders and administration site conditions   | 1065 (7.0)                   | 1606 (10.6)                    |
| Fatigue                                                | 666 (4.4)                    | 752 (5.0)                      |
| Injection site pain                                    | 118 (0.8)                    | 258 (1.7)                      |
| Gastrointestinal disorders                             | 567 (3.7)                    | 599 (3.9)                      |
| Diarrhea                                               | 199 (1.3)                    | 204 (1.3)                      |
| Nausea                                                 | 164 (1.1)                    | 162 (1.1)                      |
| Vascular disorders                                     | 204 (1.3)                    | 198 (1.3)                      |
| Hypertension                                           | 161 (1.1)                    | 153 (1.0)                      |
| Blood and lymphatic system disorders                   | 148 (1.0)                    | 292 (1.9)                      |
| Lymphadenopathy                                        | 127 (0.8)                    | 264 (1.7)                      |

AE = adverse event. An AE is defined as any event not present before exposure to study vaccination or any event already present that worsens in intensity or frequency after exposure. Percentages are based on the number of participants in the safety set. All AEs were coded using MedDRA Version 23.0. Data-cutoff date: March 26, 2021.

**Table S16. Unsolicited Severe AEs Reported by >5 Participants in Any Treatment Group up to 28 Days After Any Injection, Overall Safety Set**

| <b>System Organ Class<br/>Preferred Term n (%)</b>      | <b>Placebo<br/>(N=15166)</b> | <b>mRNA-1273<br/>(N=15185)</b> |
|---------------------------------------------------------|------------------------------|--------------------------------|
| Number of participants reporting unsolicited severe AEs | 233 (1.5)                    | 258 (1.7)                      |
| Nervous system disorders                                |                              |                                |
| Headache                                                | 11 (<0.1)                    | 14 (<0.1)                      |
| Cardiac disorders                                       |                              |                                |
| Bradycardia                                             | 3 (<0.1)                     | 4 (<0.1)                       |
| Atrial Fibrillation                                     | 3 (<0.1)                     | 4 (<0.1)                       |
| Vascular disorders                                      |                              |                                |
| Hypertension                                            | 34 (0.2)                     | 28 (0.2)                       |
| Systolic Hypertension                                   | 3 (<0.1)                     | 3 (<0.1)                       |
| Gastrointestinal disorders                              |                              |                                |
| Nausea                                                  | 1 (<0.1)                     | 5 (<0.1)                       |
| Abdominal pain                                          | 2 (<0.1)                     | 4 (<0.1)                       |
| Musculoskeletal and connective tissue disorders         |                              |                                |
| Myalgia                                                 | 4 (<0.1)                     | 9 (<0.1)                       |
| Arthralgia                                              | 7 (<0.1)                     | 7 (<0.1)                       |
| Back pain                                               | 7 (<0.1)                     | 1 (<0.1)                       |
| General disorders and administration site conditions    |                              |                                |
| Fatigue                                                 | 9 (<0.1)                     | 20 (0.1)                       |
| Injection site erythema                                 | 0                            | 8 (<0.1)                       |
| Injection site macule                                   | 0                            | 6 (<0.1)                       |
| Injection site pain                                     | 1 (<0.1)                     | 4 (<0.1)                       |
| Investigations                                          |                              |                                |
| Blood pressure increased                                | 6 (<0.1)                     | 10 (<0.1)                      |
| Blood pressure systolic increased                       | 7 (<0.1)                     | 7 (<0.1)                       |
| Infections and infestations                             |                              |                                |
| Covid-19                                                | 7 (<0.1)                     | 0                              |

An AE is defined as any event not present before exposure to study vaccination or any event already present that worsens in intensity or frequency after exposure. Percentages were based on the number of safety set participants. All AEs were coded using MedDRA Version 23.0. Data-cutoff date: March 26, 2021.

**Table S17. Summary Unsolicited AEs Up to 28 Days After Any Injection by SARS-CoV-2 Baseline Status**

| Unsolicited TEAEs<br>n (%)                                                                                                                                                                                                                                                                                                                                                       | SARS-CoV-2 Negative |                      | SARS-CoV-2 Positive |                    | SARS-CoV-2 Missing |                   |
|----------------------------------------------------------------------------------------------------------------------------------------------------------------------------------------------------------------------------------------------------------------------------------------------------------------------------------------------------------------------------------|---------------------|----------------------|---------------------|--------------------|--------------------|-------------------|
|                                                                                                                                                                                                                                                                                                                                                                                  | Placebo<br>N=14741  | mRNA-1273<br>N=14750 | Placebo<br>N=337    | mRNA-1273<br>N=347 | Placebo<br>N=84    | mRNA-1273<br>N=87 |
| <b>Regardless of relationship to study vaccination</b>                                                                                                                                                                                                                                                                                                                           |                     |                      |                     |                    |                    |                   |
| All                                                                                                                                                                                                                                                                                                                                                                              | 4233 (28.7)         | 4652 (31.5)          | 92 (27.3)           | 77 (22.2)          | 13 (15.5)          | 23 (26.4)         |
| Serious                                                                                                                                                                                                                                                                                                                                                                          | 101 (0.7)           | 96 (0.7)             | 3 (0.9)             | 1 (0.3)            | 0                  | 1 (1.1)           |
| Fatal                                                                                                                                                                                                                                                                                                                                                                            | 2 (<0.1)            | 2 (<0.1)             | 0                   | 0                  | 0                  | 0                 |
| Medically-attended                                                                                                                                                                                                                                                                                                                                                               | 1902 (12.9)         | 1782 (12.1)          | 35 (10.4)           | 25 (7.2)           | 3 (3.6)            | 12 (13.8)         |
| Leading to discontinuation from study vaccine                                                                                                                                                                                                                                                                                                                                    | 84 (0.6)            | 54 (0.4)             | 8 (2.4)             | 6 (1.7)            | 0                  | 1 (1.1)           |
| Leading to discontinuation from study                                                                                                                                                                                                                                                                                                                                            | 6 (<0.1)            | 9 (<0.1)             | 0                   | 0                  | 0                  | 0                 |
| Severe                                                                                                                                                                                                                                                                                                                                                                           | 225 (1.5)           | 256 (1.7)            | 7 (2.1)             | 1 (0.3)            | 1 (1.2)            | 1 (1.1)           |
| <b>Related to study vaccination</b>                                                                                                                                                                                                                                                                                                                                              |                     |                      |                     |                    |                    |                   |
| All                                                                                                                                                                                                                                                                                                                                                                              | 1201 (8.1)          | 2032 (13.8)          | 30 (8.9)            | 30 (8.6)           | 5 (6.0)            | 5 (5.7)           |
| Serious                                                                                                                                                                                                                                                                                                                                                                          | 3 (<0.1)            | 8 (<0.1)             | 0                   | 0                  | 0                  | 0                 |
| Fatal                                                                                                                                                                                                                                                                                                                                                                            | 0                   | 0                    | 0                   | 0                  | 0                  | 0                 |
| Medically-attended                                                                                                                                                                                                                                                                                                                                                               | 90 (0.6)            | 197 (1.3)            | 5 (1.5)             | 1 (0.3)            | 0                  | 0                 |
| Leading to discontinuation from study vaccine                                                                                                                                                                                                                                                                                                                                    | 14 (<0.1)           | 20 (0.1)             | 0                   | 0                  | 0                  | 0                 |
| Leading to discontinuation from study                                                                                                                                                                                                                                                                                                                                            | 0                   | 1 (<0.1)             | 0                   | 0                  | 0                  | 0                 |
| Severe                                                                                                                                                                                                                                                                                                                                                                           | 30 (0.2)            | 83 (0.6)             | 1 (0.3)             | 0                  | 0                  | 0                 |
| Treatment-emergent adverse event (TEAE) is defined as any event not present before exposure to study vaccination or any event already present that worsens in intensity or frequency after exposure. Percentages are based on safety set. Missing data: *n=45 (19.1%), n=60 (20.8%); n=105 (20.1%) and †n=8 (3.4%), n=11 (3.8%) and 19 (3.6%). Data-cutoff date: March 26, 2021. |                     |                      |                     |                    |                    |                   |

**Table S18. Summary of Unsolicited AEs by Severe Covid-19 Risk Up to 28 Days After Any Injection, Safety Set**

| n (%)                                           | Not at Risk        |                      | At Risk           |                     |
|-------------------------------------------------|--------------------|----------------------|-------------------|---------------------|
|                                                 | Placebo<br>N=11705 | mRNA-1273<br>N=11736 | Placebo<br>N=3457 | mRNA-1273<br>N=3448 |
| Regardless of relationship to study vaccination |                    |                      |                   |                     |
| All                                             | 3265 (27.9)        | 3564 (30.4)          | 1073 (31.0)       | 1188 (34.5)         |
| Serious                                         | 55 (0.5)           | 62 (0.5)             | 49 (1.4)          | 36 (1.0)            |
| Fatal                                           | 2 (<0.1)           | 2 (<0.1)             | 0                 | 0                   |
| Medically-attended                              | 1424 (12.2)        | 1325 (11.3)          | 516 (14.9)        | 494 (14.3)          |
| Leading to discontinuation from study vaccine   | 65 (0.6)           | 47 (0.4)             | 27 (0.8)          | 14 (0.4)            |
| Leading to discontinuation from study           | 4 (<0.1)           | 8 (<0.1)             | 2 (<0.1)          | 1 (<0.1)            |
| Severe                                          | 148 (1.3)          | 199 (1.7)            | 85 (2.5)          | 59 (1.7)            |
| Related to study vaccination                    |                    |                      |                   |                     |
| All                                             | 909 (7.8)          | 1545 (13.2)          | 327 (9.5)         | 522 (15.1)          |
| Serious                                         | 1 (<0.1)           | 6 (<0.1)             | 2 (<0.1)          | 2 (<0.1)            |
| Fatal                                           | 0                  | 0                    | 0                 | 0                   |
| Medically-attended                              | 74 (0.6)           | 137 (1.2)            | 21 (0.6)          | 61 (1.8)            |
| Leading to discontinuation from study vaccine   | 11 (<0.1)          | 15 (0.1)             | 3 (<0.1)          | 5 (0.1)             |
| Leading to discontinuation from study           | 0                  | 1 (<0.1)             | 0                 | 0                   |
| Severe                                          | 17 (0.1)           | 64 (0.5)             | 14 (0.4)          | 19 (0.6)            |

A treatment-emergent adverse event (TEAE) defined as any event not present before exposure to study vaccination or any event already present that worsens in intensity or frequency after exposure. Percentages are based on the number of participants in safety set. At risk includes those ≥65 years and those <65 years who were considered at increased risk for severe Covid-19 illness having at least 1 of the following CDC-defined risk factors at screening: chronic lung disease (eg, emphysema and chronic bronchitis, idiopathic pulmonary fibrosis, and cystic fibrosis) or moderate to severe asthma, significant cardiac disease (eg, heart failure, coronary artery disease, congenital heart disease, cardiomyopathies, and pulmonary hypertension), severe obesity (body mass index ≥ 40 kg/m<sup>2</sup>), diabetes (Type 1, Type 2 or gestational), liver disease, Human Immunodeficiency Virus (HIV) infection. Not at risk includes those <65 years without risk factors. Data-cutoff date: March 26, 2021.

**Table S19. Summary Unsolicited AEs Overall and Age Groups After Any Injection During Overall Study, Safety Set**

| n (%)                                                                                                                                                                                                                                                                                                                                                                                                                                           | Overall Safety Set |                      | ≥18-<65 years      |                      | ≥65 years         |                     |
|-------------------------------------------------------------------------------------------------------------------------------------------------------------------------------------------------------------------------------------------------------------------------------------------------------------------------------------------------------------------------------------------------------------------------------------------------|--------------------|----------------------|--------------------|----------------------|-------------------|---------------------|
|                                                                                                                                                                                                                                                                                                                                                                                                                                                 | Placebo<br>N=15162 | mRNA-1273<br>N=15184 | Placebo<br>N=11411 | mRNA-1273<br>N=11415 | Placebo<br>N=3751 | mRNA-1273<br>N=3769 |
| Regardless of relationship to study vaccination                                                                                                                                                                                                                                                                                                                                                                                                 |                    |                      |                    |                      |                   |                     |
| All                                                                                                                                                                                                                                                                                                                                                                                                                                             | 6513 (43.0)        | 6310 (41.6)          | 4909 (43.0)        | 4639 (40.6)          | 1604 (42.8)       | 1671 (44.3)         |
| Serious                                                                                                                                                                                                                                                                                                                                                                                                                                         | 292 (1.9)          | 268 (1.8)            | 168 (1.5)          | 150 (1.3)            | 124 (3.3)         | 118 (3.1)           |
| Fatal                                                                                                                                                                                                                                                                                                                                                                                                                                           | 16 (0.1)           | 17* (0.1)            | 10 (<0.1)          | 8 (<0.1)             | 6 (0.2)           | 9* (0.2)            |
| Medically-attended                                                                                                                                                                                                                                                                                                                                                                                                                              | 4131 (27.2)        | 3468 (22.8)          | 3089 (27.1)        | 2457 (21.5)          | 1042 (27.8)       | 1011 (26.8)         |
| Leading to discontinuation from study vaccine*                                                                                                                                                                                                                                                                                                                                                                                                  | 109 (0.7)          | 74 (0.5)             | 82 (0.7)           | 59 (0.5)             | 27 (0.7)          | 15 (0.4)            |
| Leading to discontinuation from study†                                                                                                                                                                                                                                                                                                                                                                                                          | 23 (0.2)           | 26 (0.2)             | 15 (0.1)           | 15 (0.1)             | 8 (0.2)           | 11 (0.3)            |
| Severe                                                                                                                                                                                                                                                                                                                                                                                                                                          | 486 (3.2)          | 461 (3.0)            | 319 (2.8)          | 304 (2.7)            | 167 (4.5)         | 157 (4.2)           |
| Related to study vaccination                                                                                                                                                                                                                                                                                                                                                                                                                    |                    |                      |                    |                      |                   |                     |
| All                                                                                                                                                                                                                                                                                                                                                                                                                                             | 1288 (8.5)         | 2107 (13.9)          | 986 (8.6)          | 1610 (14.1)          | 302 (8.1)         | 497 (13.2)          |
| Serious                                                                                                                                                                                                                                                                                                                                                                                                                                         | 4 (<0.1)           | 12 (<0.1)            | 2 (<0.1)           | 9 (<0.1)             | 2 (<0.1)          | 3 (<0.1)            |
| Fatal                                                                                                                                                                                                                                                                                                                                                                                                                                           | 0                  | 0                    | 0                  | 0                    | 0                 | 0                   |
| Medically-attended                                                                                                                                                                                                                                                                                                                                                                                                                              | 109 (0.7)          | 213 (1.4)            | 89 (0.8)           | 172 (1.5)            | 20 (0.5)          | 41 (1.1)            |
| Leading to discontinuation from study vaccine*                                                                                                                                                                                                                                                                                                                                                                                                  | 15 (<0.1)          | 20 (0.1)             | 8 (<0.1)           | 17 (0.1)             | 7 (0.2)           | 3 (<0.1)            |
| Leading to discontinuation from study†                                                                                                                                                                                                                                                                                                                                                                                                          | 0                  | 1 (<0.1)             | 0                  | 1 (<0.1)             | 0                 | 0                   |
| Severe                                                                                                                                                                                                                                                                                                                                                                                                                                          | 34 (0.2)           | 88 (0.6)             | 23 (0.2)           | 62 (0.5)             | 11 (0.3)          | 26 (0.7)            |
| A treatment-emergent adverse event (TEAE) is defined as any event not present before exposure to study vaccination or any event already present that worsens in intensity or frequency after exposure. *One participant had an AE in the blinded phase and ended in death in the unblinded phase, and thus is included in the fatal category for AEs. Percentages are based on the number of safety subjects. Data-cutoff date: March 26, 2021. |                    |                      |                    |                      |                   |                     |

**Table S20. Serious AEs Reported by Preferred Term in Any Treatment Group, Overall Safety Set**

| <b>System Organ Class Preferred Term n (%)</b>                             | <b>Placebo (N=15162)</b> | <b>mRNA-1273 N=15184</b> | <b>Rate ratio (95% CI)</b> |
|----------------------------------------------------------------------------|--------------------------|--------------------------|----------------------------|
| Number of participants reporting serious AEs                               | 292 (1.9)                | 268 (1.8)                |                            |
| Number of serious AEs                                                      | 439                      | 401                      |                            |
| <b>Infections and infestations</b>                                         | 77 (0.5)                 | 48 (0.3)                 |                            |
| Pneumonia                                                                  | 11 (<0.1)                | 9 (<0.1)                 | 0.82 (0.35, 1.92)          |
| Appendicitis                                                               | 5 (<0.1)                 | 4 (<0.1)                 |                            |
| Sepsis                                                                     | 3 (<0.1)                 | 4 (<0.1)                 |                            |
| Cellulitis                                                                 | 0                        | 3 (<0.1)                 |                            |
| Bronchitis                                                                 | 0                        | 2 (<0.1)                 |                            |
| Covid-19                                                                   | 40 (0.3)                 | 2 (<0.1)                 | 0.05 (0.01, 0.19)          |
| Peritonitis                                                                | 0                        | 2 (<0.1)                 |                            |
| Postoperative abscess                                                      | 0                        | 2 (<0.1)                 |                            |
| Urosepsis                                                                  | 0                        | 2 (<0.1)                 |                            |
| Abscess limb                                                               | 0                        | 1 (<0.1)                 |                            |
| Appendicitis perforated                                                    | 1 (<0.1)                 | 1 (<0.1)                 |                            |
| Clostridium difficile infection                                            | 0                        | 1 (<0.1)                 |                            |
| Diabetic foot infection                                                    | 0                        | 1 (<0.1)                 |                            |
| Diverticulitis                                                             | 3 (<0.1)                 | 1 (<0.1)                 |                            |
| Gastroenteritis viral                                                      | 0                        | 1 (<0.1)                 |                            |
| Giardiasis                                                                 | 0                        | 1 (<0.1)                 |                            |
| Hepatitis A                                                                | 0                        | 1 (<0.1)                 |                            |
| Liver abscess                                                              | 0                        | 1 (<0.1)                 |                            |
| Lung abscess                                                               | 0                        | 1 (<0.1)                 |                            |
| Pneumonia mycoplasmal                                                      | 0                        | 1 (<0.1)                 |                            |
| Pneumonia staphylococcal                                                   | 0                        | 1 (<0.1)                 |                            |
| Post procedural infection                                                  | 0                        | 1 (<0.1)                 |                            |
| Postoperative wound infection                                              | 0                        | 1 (<0.1)                 |                            |
| Pyelonephritis acute                                                       | 1 (<0.1)                 | 1 (<0.1)                 |                            |
| Salpingitis                                                                | 0                        | 1 (<0.1)                 |                            |
| Septic shock                                                               | 3 (<0.1)                 | 1 (<0.1)                 |                            |
| Spinal cord abscess                                                        | 0                        | 1 (<0.1)                 |                            |
| Toxic shock syndrome                                                       | 0                        | 1 (<0.1)                 |                            |
| Upper respiratory tract infection                                          | 0                        | 1 (<0.1)                 |                            |
| Urinary tract infection                                                    | 5 (<0.1)                 | 1 (<0.1)                 |                            |
| Viral infection                                                            | 0                        | 1 (<0.1)                 |                            |
| Viral pharyngitis                                                          | 0                        | 1 (<0.1)                 |                            |
| Wound infection                                                            | 0                        | 1 (<0.1)                 |                            |
| Covid-19 pneumonia                                                         | 8 (<0.1)                 | 0                        |                            |
| Clostridium difficile colitis                                              | 1 (<0.1)                 | 0                        |                            |
| Coccidioidomycosis                                                         | 1 (<0.1)                 | 0                        |                            |
| Enterococcal bacteraemia                                                   | 1 (<0.1)                 | 0                        |                            |
| Localised infection                                                        | 1 (<0.1)                 | 0                        |                            |
| Meningitis aseptic                                                         | 1 (<0.1)                 | 0                        |                            |
| Osteomyelitis                                                              | 1 (<0.1)                 | 0                        |                            |
| Perirectal abscess                                                         | 1 (<0.1)                 | 0                        |                            |
| Pharyngitis streptococcal                                                  | 1 (<0.1)                 | 0                        |                            |
| Pneumonia bacterial                                                        | 1 (<0.1)                 | 0                        |                            |
| Pneumonia klebsiella                                                       | 1 (<0.1)                 | 0                        |                            |
| Pyelonephritis                                                             | 2 (<0.1)                 | 0                        |                            |
| Streptococcal sepsis                                                       | 1 (<0.1)                 | 0                        |                            |
| Tooth abscess                                                              | 1 (<0.1)                 | 0                        |                            |
| <b>Neoplasms benign, malignant and unspecified (incl cysts and polyps)</b> | 24 (0.2)                 | 27 (0.2)                 |                            |
| Prostate cancer                                                            | 4 (<0.1)                 | 5 (<0.1)                 |                            |
| Hepatocellular carcinoma                                                   | 0                        | 2 (<0.1)                 |                            |
| B-cell small lymphocytic lymphoma                                          | 0                        | 1 (<0.1)                 |                            |

|                                             |                     |                    |  |
|---------------------------------------------|---------------------|--------------------|--|
| Benign lung neoplasm                        | 0                   | 1 (<0.1)           |  |
| Cancer pain                                 | 0                   | 1 (<0.1)           |  |
| Clear cell renal cell carcinoma             | 1 (<0.1)            | 1 (<0.1)           |  |
| Colorectal cancer                           | 0                   | 1 (<0.1)           |  |
| Gastric cancer                              | 0                   | 1 (<0.1)           |  |
| Gastrointestinal stromal tumour             | 0                   | 1 (<0.1)           |  |
| Invasive lobular breast carcinoma           | 0                   | 1 (<0.1)           |  |
| Liposarcoma                                 | 0                   | 1 (<0.1)           |  |
| Malignant melanoma                          | 0                   | 1 (<0.1)           |  |
| Meningioma                                  | 0                   | 1 (<0.1)           |  |
| Metastases to bone                          | 0                   | 1 (<0.1)           |  |
| Metastases to lung                          | 0                   | 1 (<0.1)           |  |
| Metastatic neoplasm                         | 0                   | 1 (<0.1)           |  |
| Non-Hodgkin's lymphoma                      | 0                   | 1 (<0.1)           |  |
| Oesophageal carcinoma                       | 0                   | 1 (<0.1)           |  |
| Papillary thyroid cancer                    | 1 (<0.1)            | 1 (<0.1)           |  |
| Pelvic neoplasm                             | 0                   | 1 (<0.1)           |  |
| Plasma cell myeloma                         | 0                   | 1 (<0.1)           |  |
| Renal cell carcinoma                        | 1 (<0.1)            | 1 (<0.1)           |  |
| Splenic marginal zone lymphoma              | 0                   | 1 (<0.1)           |  |
| Throat cancer                               | 0                   | 1 (<0.1)           |  |
| Thymoma malignant                           | 0                   | 1 (<0.1)           |  |
| Thyroid cancer metastatic                   | 0                   | 1 (<0.1)           |  |
| Adenocarcinoma gastric                      | 1 (<0.1)            | 0                  |  |
| Breast cancer stage I                       | 1 (<0.1)            | 0                  |  |
| Colon cancer stage III                      | 1 (<0.1)            | 0                  |  |
| Endometrial cancer                          | 3 (<0.1)            | 0                  |  |
| Intraductal proliferative breast lesion     | 3 (<0.1)            | 0                  |  |
| Invasive ductal breast carcinoma            | 1 (<0.1)            | 0                  |  |
| Leiomyosarcoma metastatic                   | 1 (<0.1)            | 0                  |  |
| Lung adenocarcinoma                         | 1 (<0.1)            | 0                  |  |
| Non-small cell lung cancer                  | 1 (<0.1)            | 0                  |  |
| Pancreatic carcinoma stage IV               | 1 (<0.1)            | 0                  |  |
| Prostate cancer metastatic                  | 1 (<0.1)            | 0                  |  |
| Thyroid cancer                              | 1 (<0.1)            | 0                  |  |
| Uterine leiomyoma                           | 1 (<0.1)            | 0                  |  |
| <b>Blood and lymphatic system disorders</b> | <b>7 (&lt;0.1)</b>  | <b>3 (&lt;0.1)</b> |  |
| Anaemia                                     | 2 (<0.1)            | 2 (<0.1)           |  |
| Blood loss anaemia                          | 1 (<0.1)            | 1 (<0.1)           |  |
| Thrombocytopenia                            | 1 (<0.1)            | 1 (<0.1)           |  |
| Anaemia macrocytic                          | 1 (<0.1)            | 0                  |  |
| Iron deficiency anaemia                     | 1 (<0.1)            | 0                  |  |
| Thrombocytosis                              | 1 (<0.1)            | 0                  |  |
| <b>Immune system disorders</b>              | <b>2 (&lt;0.1)</b>  | <b>0</b>           |  |
| Anaphylactic reaction                       | 1 (<0.1)            | 0                  |  |
| Cytokine storm                              | 1 (<0.1)            | 0                  |  |
| Endocrine disorders                         | 0                   | 1 (<0.1)           |  |
| Basedow's disease                           | 0                   | 1 (<0.1)           |  |
| <b>Metabolism and nutrition disorders</b>   | <b>15 (&lt;0.1)</b> | <b>17 (0.1)</b>    |  |
| Dehydration                                 | 4 (<0.1)            | 4 (<0.1)           |  |
| Diabetic ketoacidosis                       | 3 (<0.1)            | 3 (<0.1)           |  |
| Hyponatraemia                               | 1 (<0.1)            | 3 (<0.1)           |  |
| Hypoglycaemia                               | 1 (<0.1)            | 2 (<0.1)           |  |
| Type 2 diabetes mellitus                    | 1 (<0.1)            | 2 (<0.1)           |  |
| Diabetic complication                       | 0                   | 1 (<0.1)           |  |
| Failure to thrive                           | 0                   | 1 (<0.1)           |  |
| Gout                                        | 1 (<0.1)            | 1 (<0.1)           |  |
| Hyperkalaemia                               | 0                   | 1 (<0.1)           |  |
| Hypokalaemia                                | 1 (<0.1)            | 1 (<0.1)           |  |



|                                      |                     |                     |                   |
|--------------------------------------|---------------------|---------------------|-------------------|
| Obesity                              | 0                   | 1 (<0.1)            |                   |
| Diabetes mellitus                    | 1 (<0.1)            | 0                   |                   |
| Diabetes mellitus inadequate control | 1 (<0.1)            | 0                   |                   |
| Hypomagnesaemia                      | 1 (<0.1)            | 0                   |                   |
| Metabolic acidosis                   | 1 (<0.1)            | 0                   |                   |
| <b>Psychiatric disorders</b>         | <b>13 (&lt;0.1)</b> | <b>13 (&lt;0.1)</b> |                   |
| Depression                           | 2 (<0.1)            | 3 (<0.1)            |                   |
| Alcohol withdrawal syndrome          | 1 (<0.1)            | 2 (<0.1)            |                   |
| Alcohol abuse                        | 0                   | 1 (<0.1)            |                   |
| Completed suicide                    | 1 (<0.1)            | 1 (<0.1)            |                   |
| Drug abuse                           | 0                   | 1 (<0.1)            |                   |
| Intentional self-injury              | 0                   | 1 (<0.1)            |                   |
| Mental status changes                | 1 (<0.1)            | 1 (<0.1)            |                   |
| Schizoaffective disorder             | 1 (<0.1)            | 1 (<0.1)            |                   |
| Substance-induced mood disorder      | 0                   | 1 (<0.1)            |                   |
| Substance-induced psychotic disorder | 0                   | 1 (<0.1)            |                   |
| Suicidal ideation                    | 0                   | 1 (<0.1)            |                   |
| Suicide attempt                      | 0                   | 1 (<0.1)            |                   |
| Alcoholism                           | 1 (<0.1)            | 0                   |                   |
| Anxiety                              | 1 (<0.1)            | 0                   |                   |
| Anxiety disorder                     | 1 (<0.1)            | 0                   |                   |
| Confusional state                    | 1 (<0.1)            | 0                   |                   |
| Depression suicidal                  | 1 (<0.1)            | 0                   |                   |
| Major depression                     | 2 (<0.1)            | 0                   |                   |
| Mania                                | 1 (<0.1)            | 0                   |                   |
| Schizophrenia                        | 1 (<0.1)            | 0                   |                   |
| <b>Nervous system disorders</b>      | <b>27 (0.2)</b>     | <b>31 (0.2)</b>     |                   |
| Cerebrovascular accident             | 4 (<0.1)            | 6 (<0.1)            |                   |
| Syncope                              | 7 (<0.1)            | 5 (<0.1)            | 0.71 (0.24, 2.13) |
| Seizure                              | 1 (<0.1)            | 3 (<0.1)            |                   |
| Subarachnoid haemorrhage             | 0                   | 3 (<0.1)            |                   |
| Embolic stroke                       | 0                   | 2 (<0.1)            |                   |
| Transient ischaemic attack           | 2 (<0.1)            | 2 (<0.1)            |                   |
| Aphasia                              | 0                   | 1 (<0.1)            |                   |
| Autonomic nervous system imbalance   | 0                   | 1 (<0.1)            |                   |
| Carotid artery stenosis              | 0                   | 1 (<0.1)            |                   |
| Carotid artery thrombosis            | 0                   | 1 (<0.1)            |                   |
| Cauda equina syndrome                | 0                   | 1 (<0.1)            |                   |
| Cervical radiculopathy               | 0                   | 1 (<0.1)            |                   |
| Dizziness                            | 1 (<0.1)            | 1 (<0.1)            |                   |
| Facial paralysis                     | 0                   | 1 (<0.1)            |                   |
| Hemiparesis                          | 0                   | 1 (<0.1)            |                   |
| Lumbar radiculopathy                 | 0                   | 1 (<0.1)            |                   |
| Multiple sclerosis                   | 1 (<0.1)            | 1 (<0.1)            |                   |
| Optic neuritis                       | 0                   | 1 (<0.1)            |                   |
| Spinal cord compression              | 0                   | 1 (<0.1)            |                   |
| Amyotrophic lateral sclerosis        | 1 (<0.1)            | 0                   |                   |
| Arachnoid cyst                       | 1 (<0.1)            | 0                   |                   |
| Basal ganglia haemorrhage            | 1 (<0.1)            | 0                   |                   |
| Encephalopathy                       | 2 (<0.1)            | 0                   |                   |
| Hydrocephalus                        | 1 (<0.1)            | 0                   |                   |
| Ischaemic stroke                     | 1 (<0.1)            | 0                   |                   |
| Loss of consciousness                | 1 (<0.1)            | 0                   |                   |
| Migraine                             | 1 (<0.1)            | 0                   |                   |
| Nerve compression                    | 1 (<0.1)            | 0                   |                   |
| Paraesthesia                         | 1 (<0.1)            | 0                   |                   |
| Speech disorder                      | 1 (<0.1)            | 0                   |                   |
| <b>Eye disorders</b>                 | <b>1 (&lt;0.1)</b>  | <b>0</b>            |                   |
| Retinal detachment                   | 1 (<0.1)            | 0                   |                   |
| Retinal tear                         | 1 (<0.1)            | 0                   |                   |

|                                                        |           |           |                   |
|--------------------------------------------------------|-----------|-----------|-------------------|
| <b>Cardiac disorders</b>                               | 43 (0.3)  | 36 (0.2)  |                   |
| Myocardial infarction                                  | 9 (<0.1)  | 7 (<0.1)  | 0.78 (0.30, 2.01) |
| Atrial fibrillation                                    | 10 (<0.1) | 6 (<0.1)  | 0.60 (0.23, 1.59) |
| Cardiac failure congestive                             | 3 (<0.1)  | 4 (<0.1)  |                   |
| Acute coronary syndrome                                | 0         | 3 (<0.1)  |                   |
| Acute myocardial infarction                            | 6 (<0.1)  | 3 (<0.1)  |                   |
| Coronary artery disease                                | 3 (<0.1)  | 3 (<0.1)  |                   |
| Atrial flutter                                         | 2 (<0.1)  | 2 (<0.1)  |                   |
| Cardio-respiratory arrest                              | 1 (<0.1)  | 2 (<0.1)  |                   |
| Pericarditis*                                          | 2 (<0.1)  | 2 (<0.1)  |                   |
| Acute left ventricular failure                         | 2 (<0.1)  | 1 (<0.1)  |                   |
| Angina unstable                                        | 0         | 1 (<0.1)  |                   |
| Bradycardia                                            | 0         | 1 (<0.1)  |                   |
| Cardiac arrest                                         | 0         | 1 (<0.1)  |                   |
| Cardiac failure                                        | 2 (<0.1)  | 1 (<0.1)  |                   |
| Cardiac failure acute                                  | 1 (<0.1)  | 1 (<0.1)  |                   |
| Coronary artery occlusion                              | 0         | 1 (<0.1)  |                   |
| Pericardial effusion                                   | 1 (<0.1)  | 1 (<0.1)  |                   |
| Stress cardiomyopathy                                  | 0         | 1 (<0.1)  |                   |
| Supraventricular tachycardia                           | 0         | 1 (<0.1)  |                   |
| Ventricular extrasystoles                              | 0         | 1 (<0.1)  |                   |
| Angina pectoris                                        | 1 (<0.1)  | 0         |                   |
| Arrhythmia                                             | 1 (<0.1)  | 0         |                   |
| Atrioventricular block complete                        | 1 (<0.1)  | 0         |                   |
| Atrioventricular block second degree                   | 1 (<0.1)  | 0         |                   |
| Paroxysmal arrhythmia                                  | 1 (<0.1)  | 0         |                   |
| Sinus tachycardia                                      | 2 (<0.1)  | 0         |                   |
| <b>Vascular disorders</b>                              | 15 (<0.1) | 15 (<0.1) |                   |
| Deep vein thrombosis                                   | 1 (<0.1)  | 4 (<0.1)  |                   |
| Haematoma                                              | 0         | 2 (<0.1)  |                   |
| Hypertension                                           | 2 (<0.1)  | 2 (<0.1)  |                   |
| Hypertensive urgency                                   | 1 (<0.1)  | 2 (<0.1)  |                   |
| Aortic aneurysm                                        | 1 (<0.1)  | 1 (<0.1)  |                   |
| Arteriosclerosis                                       | 0         | 1 (<0.1)  |                   |
| Axillary vein thrombosis                               | 0         | 1 (<0.1)  |                   |
| Embolism venous                                        | 0         | 1 (<0.1)  |                   |
| Hypotension                                            | 2 (<0.1)  | 1 (<0.1)  |                   |
| Polyarteritis nodosa                                   | 0         | 1 (<0.1)  |                   |
| Venous thrombosis limb                                 | 0         | 1 (<0.1)  |                   |
| Aortic stenosis                                        | 1 (<0.1)  | 0         |                   |
| Arterial haemorrhage                                   | 1 (<0.1)  | 0         |                   |
| Fibromuscular dysplasia                                | 1 (<0.1)  | 0         |                   |
| Hypertensive emergency                                 | 2 (<0.1)  | 0         |                   |
| Peripheral artery aneurysm                             | 1 (<0.1)  | 0         |                   |
| Peripheral artery occlusion                            | 1 (<0.1)  | 0         |                   |
| Thrombophlebitis superficial                           | 1 (<0.1)  | 0         |                   |
| <b>Respiratory, thoracic and mediastinal disorders</b> | 35 (0.2)  | 25 (0.2)  |                   |
| Acute respiratory failure                              | 10 (<0.1) | 7 (<0.1)  | 0.70 (0.28, 1.77) |
| Pulmonary embolism                                     | 7 (<0.1)  | 6 (<0.1)  | 0.86 (0.30, 2.43) |
| Dyspnoea                                               | 0         | 5 (<0.1)  |                   |
| Pleural effusion                                       | 2 (<0.1)  | 2 (<0.1)  |                   |
| Respiratory failure                                    | 1 (<0.1)  | 2 (<0.1)  |                   |
| Atelectasis                                            | 0         | 1 (<0.1)  |                   |
| Chronic obstructive pulmonary disease                  | 8 (<0.1)  | 1 (<0.1)  | 0.12 (0.02, 0.77) |
| Emphysema                                              | 1 (<0.1)  | 1 (<0.1)  |                   |
| Pneumothorax                                           | 2 (<0.1)  | 1 (<0.1)  |                   |
| Pulmonary mass                                         | 0         | 1 (<0.1)  |                   |
| Acute respiratory distress syndrome                    | 1 (<0.1)  | 0         |                   |
| Asthma                                                 | 1 (<0.1)  | 0         |                   |
| Epistaxis                                              | 1 (<0.1)  | 0         |                   |

|                                                        |                    |                    |                   |
|--------------------------------------------------------|--------------------|--------------------|-------------------|
| Hypoxia                                                | 3 (<0.1)           | 0                  |                   |
| Laryngeal oedema                                       | 1 (<0.1)           | 0                  |                   |
| Organising pneumonia                                   | 1 (<0.1)           | 0                  |                   |
| Pleuritic pain                                         | 1 (<0.1)           | 0                  |                   |
| Pneumonia aspiration                                   | 1 (<0.1)           | 0                  |                   |
| Pulmonary fibrosis                                     | 1 (<0.1)           | 0                  |                   |
| Pulmonary infarction                                   | 1 (<0.1)           | 0                  |                   |
| <b>Gastrointestinal disorders</b>                      | <b>25 (0.2)</b>    | <b>36 (0.2)</b>    |                   |
| Colitis                                                | 4 (<0.1)           | 3 (<0.1)           |                   |
| Gastrointestinal haemorrhage                           | 2 (<0.1)           | 3 (<0.1)           |                   |
| Nausea                                                 | 3 (<0.1)           | 3 (<0.1)           |                   |
| Small intestinal obstruction                           | 3 (<0.1)           | 3 (<0.1)           |                   |
| Abdominal pain                                         | 2 (<0.1)           | 2 (<0.1)           |                   |
| Abdominal pain upper                                   | 0                  | 2 (<0.1)           |                   |
| Diarrhoea                                              | 1 (<0.1)           | 2 (<0.1)           |                   |
| Duodenal ulcer perforation                             | 0                  | 2 (<0.1)           |                   |
| Hiatus hernia                                          | 1 (<0.1)           | 2 (<0.1)           |                   |
| Intestinal obstruction                                 | 0                  | 2 (<0.1)           |                   |
| Vomiting                                               | 2 (<0.1)           | 2 (<0.1)           |                   |
| Crohn's disease                                        | 0                  | 1 (<0.1)           |                   |
| Diverticular perforation                               | 0                  | 1 (<0.1)           |                   |
| Duodenal ulcer                                         | 0                  | 1 (<0.1)           |                   |
| Gastritis                                              | 2 (<0.1)           | 1 (<0.1)           |                   |
| Gastrooesophageal reflux disease                       | 0                  | 1 (<0.1)           |                   |
| Inguinal hernia                                        | 0                  | 1 (<0.1)           |                   |
| Intra-abdominal fluid collection                       | 0                  | 1 (<0.1)           |                   |
| Large intestine perforation                            | 0                  | 1 (<0.1)           |                   |
| Oesophageal rupture                                    | 0                  | 1 (<0.1)           |                   |
| Oesophageal spasm                                      | 0                  | 1 (<0.1)           |                   |
| Pancreatitis                                           | 2 (<0.1)           | 1 (<0.1)           |                   |
| Pancreatitis acute                                     | 0                  | 1 (<0.1)           |                   |
| Rectal prolapse                                        | 0                  | 1 (<0.1)           |                   |
| Retroperitoneal haemorrhage                            | 0                  | 1 (<0.1)           |                   |
| Abdominal hernia                                       | 1 (<0.1)           | 0                  |                   |
| Abdominal pain lower                                   | 2 (<0.1)           | 0                  |                   |
| Duodenal ulcer haemorrhage                             | 1 (<0.1)           | 0                  |                   |
| Gastric perforation                                    | 1 (<0.1)           | 0                  |                   |
| Gastric ulcer haemorrhage                              | 1 (<0.1)           | 0                  |                   |
| Tooth socket haemorrhage                               | 1 (<0.1)           | 0                  |                   |
| <b>Hepatobiliary disorders</b>                         | <b>5 (&lt;0.1)</b> | <b>6 (&lt;0.1)</b> |                   |
| Cholecystitis                                          | 3 (<0.1)           | 3 (<0.1)           |                   |
| Bile duct stone                                        | 0                  | 2 (<0.1)           |                   |
| Cholelithiasis                                         | 0                  | 1 (<0.1)           |                   |
| Biliary dyskinesia                                     | 1 (<0.1)           | 0                  |                   |
| Cholecystitis acute                                    | 1 (<0.1)           | 0                  |                   |
| <b>Skin and subcutaneous tissue disorders</b>          | <b>2 (&lt;0.1)</b> | <b>3 (&lt;0.1)</b> |                   |
| Alopecia areata                                        | 0                  | 1 (<0.1)           |                   |
| Angioedema                                             | 1 (<0.1)           | 1 (<0.1)           |                   |
| Rash                                                   | 0                  | 1 (<0.1)           |                   |
| Rash vesicular                                         | 0                  | 1 (<0.1)           |                   |
| Dermatitis bullous                                     | 1 (<0.1)           | 0                  |                   |
| <b>Musculoskeletal and connective tissue disorders</b> | <b>28 (0.2)</b>    | <b>24 (0.2)</b>    |                   |
| Osteoarthritis                                         | 12 (<0.1)          | 8 (<0.1)           | 0.67 (0.28, 1.58) |
| Intervertebral disc protrusion                         | 2 (<0.1)           | 3 (<0.1)           |                   |
| Back pain                                              | 0                  | 2 (<0.1)           |                   |
| Spinal stenosis                                        | 2 (<0.1)           | 2 (<0.1)           |                   |
| Flank pain                                             | 1 (<0.1)           | 1 (<0.1)           |                   |
| Fracture nonunion                                      | 0                  | 1 (<0.1)           |                   |
| Muscular weakness                                      | 1 (<0.1)           | 1 (<0.1)           |                   |
| Musculoskeletal chest pain                             | 1 (<0.1)           | 1 (<0.1)           |                   |

|                                                             |           |           |  |
|-------------------------------------------------------------|-----------|-----------|--|
| Neck pain                                                   | 0         | 1 (<0.1)  |  |
| Rheumatoid arthritis                                        | 0         | 1 (<0.1)  |  |
| Spinal osteoarthritis                                       | 3 (<0.1)  | 1 (<0.1)  |  |
| Spondylolisthesis                                           | 0         | 1 (<0.1)  |  |
| Vertebral foraminal stenosis                                | 0         | 1 (<0.1)  |  |
| Arthritis                                                   | 1 (<0.1)  | 0         |  |
| Cervical spinal stenosis                                    | 1 (<0.1)  | 0         |  |
| Joint stiffness                                             | 1 (<0.1)  | 0         |  |
| Osteonecrosis                                               | 1 (<0.1)  | 0         |  |
| Polymyalgia rheumatica                                      | 1 (<0.1)  | 0         |  |
| Rhabdomyolysis                                              | 1 (<0.1)  | 0         |  |
| <b>Renal and urinary disorders</b>                          | 11 (<0.1) | 10 (<0.1) |  |
| Acute kidney injury                                         | 6 (<0.1)  | 5 (<0.1)  |  |
| Nephrolithiasis                                             | 1 (<0.1)  | 5 (<0.1)  |  |
| Chronic kidney disease                                      | 2 (<0.1)  | 1 (<0.1)  |  |
| Renal impairment                                            | 1 (<0.1)  | 0         |  |
| Urinary retention                                           | 1 (<0.1)  | 0         |  |
| <b>Pregnancy, puerperium and perinatal conditions</b>       | 2 (<0.1)  | 1 (<0.1)  |  |
| Abortion spontaneous                                        | 1 (<0.1)  | 1 (<0.1)  |  |
| Ectopic pregnancy                                           | 1 (<0.1)  | 0         |  |
| Reproductive system and breast disorders                    | 6 (<0.1)  | 6 (<0.1)  |  |
| Pelvic pain                                                 | 0         | 2 (<0.1)  |  |
| Benign prostatic hyperplasia                                | 1 (<0.1)  | 1 (<0.1)  |  |
| Dysfunctional uterine bleeding                              | 0         | 1 (<0.1)  |  |
| Ovarian cyst                                                | 2 (<0.1)  | 1 (<0.1)  |  |
| Uterine haemorrhage                                         | 0         | 1 (<0.1)  |  |
| Breast pain                                                 | 1 (<0.1)  | 0         |  |
| Endometrial hyperplasia                                     | 1 (<0.1)  | 0         |  |
| Pelvic prolapse                                             | 1 (<0.1)  | 0         |  |
| <b>Congenital, familial and genetic disorders</b>           | 1 (<0.1)  | 0         |  |
| Talipes                                                     | 1 (<0.1)  | 0         |  |
| <b>General disorders and administration site conditions</b> | 12 (<0.1) | 15 (<0.1) |  |
| Death                                                       | 2 (<0.1)  | 4 (<0.1)  |  |
| Non-cardiac chest pain                                      | 2 (<0.1)  | 3 (<0.1)  |  |
| Chest pain                                                  | 2 (<0.1)  | 2 (<0.1)  |  |
| Swelling face                                               | 1 (<0.1)  | 2 (<0.1)  |  |
| Asthenia                                                    | 0         | 1 (<0.1)  |  |
| Drug withdrawal syndrome                                    | 0         | 1 (<0.1)  |  |
| Generalised oedema                                          | 0         | 1 (<0.1)  |  |
| Multiple organ dysfunction syndrome                         | 0         | 1 (<0.1)  |  |
| Oedema peripheral                                           | 0         | 1 (<0.1)  |  |
| Feeling hot                                                 | 1 (<0.1)  | 0         |  |
| Incarcerated hernia                                         | 2 (<0.1)  | 0         |  |
| Pyrexia                                                     | 1 (<0.1)  | 0         |  |
| Systemic inflammatory response syndrome                     | 2 (<0.1)  | 0         |  |
| <b>Investigations</b>                                       | 1 (<0.1)  | 3 (<0.1)  |  |
| Hepatic enzyme increased                                    | 0         | 2 (<0.1)  |  |
| Heart rate irregular                                        | 0         | 1 (<0.1)  |  |
| Transaminases increased                                     | 1 (<0.1)  | 0         |  |
| <b>Injury, poisoning and procedural complications</b>       | 29 (0.2)  | 27 (0.2)  |  |
| Hip fracture                                                | 3 (<0.1)  | 3 (<0.1)  |  |
| Cervical vertebral fracture                                 | 0         | 2 (<0.1)  |  |
| Cranio-cerebral injury                                      | 0         | 2 (<0.1)  |  |
| Fall                                                        | 5 (<0.1)  | 2 (<0.1)  |  |
| Road traffic accident                                       | 1 (<0.1)  | 2 (<0.1)  |  |
| Subdural haematoma                                          | 0         | 2 (<0.1)  |  |
| Back injury                                                 | 0         | 1 (<0.1)  |  |
| Concussion                                                  | 0         | 1 (<0.1)  |  |

|                                          |          |          |  |
|------------------------------------------|----------|----------|--|
| Facial bones fracture                    | 0        | 1 (<0.1) |  |
| Femoral neck fracture                    | 0        | 1 (<0.1) |  |
| Femur fracture                           | 2 (<0.1) | 1 (<0.1) |  |
| Gastrointestinal procedural complication | 0        | 1 (<0.1) |  |
| Head injury                              | 0        | 1 (<0.1) |  |
| Humerus fracture                         | 0        | 1 (<0.1) |  |
| Incarcerated incisional hernia           | 0        | 1 (<0.1) |  |
| Incision site pain                       | 0        | 1 (<0.1) |  |
| Joint injury                             | 1 (<0.1) | 1 (<0.1) |  |
| Overdose                                 | 0        | 1 (<0.1) |  |
| Post procedural haemorrhage              | 1 (<0.1) | 1 (<0.1) |  |
| Procedural haemorrhage                   | 1 (<0.1) | 1 (<0.1) |  |
| Rib fracture                             | 3 (<0.1) | 1 (<0.1) |  |
| Skin laceration                          | 1 (<0.1) | 1 (<0.1) |  |
| Superficial injury of eye                | 0        | 1 (<0.1) |  |
| Tendon rupture                           | 1 (<0.1) | 1 (<0.1) |  |
| Traumatic liver injury                   | 0        | 1 (<0.1) |  |
| Upper limb fracture                      | 0        | 1 (<0.1) |  |
| Wound dehiscence                         | 0        | 1 (<0.1) |  |
| Wrist fracture                           | 0        | 1 (<0.1) |  |
| Ankle fracture                           | 1 (<0.1) | 0        |  |
| Cartilage injury                         | 1 (<0.1) | 0        |  |
| Gun shot wound                           | 1 (<0.1) | 0        |  |
| Immunisation anxiety related reaction    | 1 (<0.1) | 0        |  |
| Pelvic fracture                          | 1 (<0.1) | 0        |  |
| Post procedural fever                    | 1 (<0.1) | 0        |  |
| Post procedural haematoma                | 1 (<0.1) | 0        |  |
| Post-traumatic pain                      | 1 (<0.1) | 0        |  |
| Sternal fracture                         | 1 (<0.1) | 0        |  |
| Thoracic vertebral fracture              | 1 (<0.1) | 0        |  |
| Tracheal haemorrhage                     | 1 (<0.1) | 0        |  |
| Traumatic haemothorax                    | 2 (<0.1) | 0        |  |
| <b>Social circumstances</b>              | 1 (<0.1) | 0        |  |
| Sexual abuse                             | 1 (<0.1) | 0        |  |
| <b>Product issues</b>                    | 1 (<0.1) | 0        |  |
| Lead dislodgement                        | 1 (<0.1) | 0        |  |

AE is defined as any event not present before exposure to study vaccination or any event already present that worsens in intensity or frequency after exposure. Percentages are based on the number of participants in the safety set. All AEs were coded using MedDRA Version 23.0. \*Onset post-dose 2 at 68 days (moderate pericarditis and grade 4 pericardial effusion) and at 73 days (grade 4 pericarditis) in mRNA-1273 participants. Data-cutoff date: March 26, 2021.

**Table S21. Serious and Severe Treatment-related AEs after Any Injection in Overall and Age Groups Safety Set**

| Adverse events n (%)                             | Overall  |           | ≥18-<65 yrs |           | ≥65 yrs  |           |
|--------------------------------------------------|----------|-----------|-------------|-----------|----------|-----------|
|                                                  | Placebo  | mRNA-1273 | Placebo     | mRNA-1273 | Placebo  | mRNA-1273 |
|                                                  | N=15162  | N=15184   | N=11411     | N=11415   | N=3751   | N=3769    |
| <b>Serious AEs (study observation period)</b>    |          |           |             |           |          |           |
| Incidence of unsolicited AEs                     | 4 (<0.1) | 12 (<0.1) | 2 (<0.1)    | 9 (<0.1)  | 2 (<0.1) | 3 (<0.1)  |
| B-cell small lymphocytic lymphoma                | 0        | 1 (<0.1)  | -           | -         | 0        | 1 (<0.1)  |
| Basedow's disease                                | 0        | 1 (<0.1)  | -           | -         | 0        | 1 (<0.1)  |
| Hypomagnesaemia                                  | 1 (<0.1) | 0         | -           | -         | 1 (<0.1) | 0         |
| Autonomic nervous system imbalance               | 0        | 1 (<0.1)  | 0           | 1 (<0.1)  | -        | -         |
| Cerebrovascular accident                         | 0        | 1 (<0.1)  | 0           | 1 (<0.1)  | -        | -         |
| Multiple sclerosis                               | 0        | 1 (<0.1)  | 0           | 1 (<0.1)  | -        | -         |
| Paraesthesia                                     | 1 (<0.1) | 0         | 1 (<0.1)    | 0         | -        | -         |
| Pericardial effusion                             | 0        | 1 (<0.1)  | 0           | 1 (<0.1)  | -        | -         |
| Pericarditis                                     | 0        | 1 (<0.1)* | 0           | 1 (<0.1)  | -        | -         |
| Acute myocardial infarction                      | 1 (<0.1) | 0         | -           | -         | 1 (<0.1) | 0         |
| Atrial fibrillation                              | 1 (<0.1) | 0         | -           | -         | 1 (<0.1) | 0         |
| Pleural effusion                                 | 0        | 1 (<0.1)  | 0           | 1 (<0.1)  | -        | -         |
| Organising pneumonia                             | 1 (<0.1) | 0         | -           | -         | 1 (<0.1) | 0         |
| Respiratory failure                              | 1 (<0.1) | 0         | -           | -         | 1 (<0.1) | 0         |
| Nausea                                           | 0        | 1 (<0.1)  | -           | -         | 0        | 1 (<0.1)  |
| Vomiting                                         | 0        | 1 (<0.1)  | -           | -         | 0        | 1 (<0.1)  |
| Alopecia areata                                  | 0        | 1 (<0.1)  | 0           | 1 (<0.1)  | -        | -         |
| Angioedema                                       | 0        | 1 (<0.1)  | 0           | 1 (<0.1)  | -        | -         |
| Rheumatoid arthritis                             | 0        | 1 (<0.1)  | 0           | 1 (<0.1)  | -        | -         |
| Polymyalgia rheumatica                           | 1 (<0.1) | 0         | -           | -         | 1 (<0.1) | 0         |
| Acute kidney injury                              | 1 (<0.1) | 0         | -           | -         | 1 (<0.1) | 0         |
| Swelling face                                    | 1 (<0.1) | 2 (<0.1)  | 1 (<0.1)    | 2 (<0.1)  | -        | -         |
| Feeling hot                                      | 1 (<0.1) | 0         | 1 (<0.1)    | 0         | -        | -         |
| Immunisation anxiety-related reaction            | 1 (<0.1) | 0         | 1 (<0.1)    | 0         | -        | -         |
| Procedural haemorrhage                           | 1 (<0.1) | 0         | 1 (<0.1)    | 0         | -        | -         |
| <b>Severe AEs (≤28 days after any injection)</b> |          |           |             |           |          |           |
| Incidence of unsolicited severe AEs              | 31 (0.2) | 83 (0.5)  | 20 (0.2)    | 59 (0.5)  | 11 (0.3) | 24 (0.6)  |
| Lymph node pain                                  | 0        | 1 (<0.1)  | 0           | 1 (<0.1)  | -        | -         |
| Lymphadenopathy                                  | 0        | 1 (<0.1)  | 0           | 1 (<0.1)  | -        | -         |
| Type IV hypersensitivity reaction                | 0        | 1 (<0.1)  | -           | -         | 0        | 1 (<0.1)  |
| Headache                                         | 7 (<0.1) | 7 (<0.1)  | 6 (<0.1)    | 6 (<0.1)  | 1 (<0.1) | 1 (<0.1)  |
| Migraine                                         | 0        | 2 (<0.1)  | 0           | 2 (<0.1)  | -        | -         |
| Dizziness                                        | 1 (<0.1) | 1 (<0.1)  | 1 (<0.1)    | 1 (<0.1)  | -        | -         |
| Migraine with aura                               | 0        | 1 (<0.1)  | -           | -         | -        | -         |
| Movement disorder                                | 0        | 1 (<0.1)  | 0           | 1 (<0.1)  | 0        | 1 (<0.1)  |
| Syncope                                          | 0        | 1 (<0.1)  | 0           | 1 (<0.1)  | -        | -         |
| Vertigo                                          | 0        | 1 (<0.1)  | 0           | 1 (<0.1)  | -        | -         |
| Hypertension                                     | 9 (<0.1) | 6 (<0.1)  | 1 (<0.1)    | 3 (<0.1)  | 8 (0.2)  | 3 (<0.1)  |
| Tachypnoea                                       | 0        | 1 (<0.1)  | 0           | 1 (<0.1)  | -        | -         |
| Nausea                                           | 0        | 2 (<0.1)  | 0           | 1 (<0.1)  | 0        | 1 (<0.1)  |
| Dyspepsia                                        | 0        | 1 (<0.1)  | 0           | 1 (<0.1)  | -        | -         |
| Dermatitis                                       | 0        | 1 (<0.1)  | -           | -         | 0        | 1 (<0.1)  |
| Pruritus                                         | 0        | 1 (<0.1)  | 0           | 1 (<0.1)  | -        | -         |
| Rash                                             | 0        | 1 (<0.1)  | 0           | 1 (<0.1)  | -        | -         |
| Rash macular                                     | 0        | 1 (<0.1)  | -           | -         | 0        | 1 (<0.1)  |
| Urticaria                                        | 0        | 1 (<0.1)  | 0           | 1 (<0.1)  | -        | -         |
| Myalgia                                          | 2 (<0.1) | 8 (<0.1)  | 2 (<0.1)    | 6 (<0.1)  | 0        | 2 (<0.1)  |
| Arthralgia                                       | 5 (<0.1) | 3 (<0.1)  | 5 (<0.1)    | 3 (<0.1)  | -        | -         |
| Muscle spasms                                    | 0        | 2 (<0.1)  | 0           | 1 (<0.1)  | 0        | 1 (<0.1)  |
| Pain in extremity                                | 0        | 2 (<0.1)  | 0           | 1 (<0.1)  | 0        | 1 (<0.1)  |
| Neck pain                                        | 0        | 1 (<0.1)  | 0           | 1 (<0.1)  | -        | -         |
| Temporomandibular joint syndrome                 | 0        | 1 (<0.1)  | 0           | 1 (<0.1)  | -        | -         |
| Back pain                                        | 1 (<0.1) | 0         | 1 (<0.1)    | 0         | -        | -         |
| Polymyalgia rheumatica                           | 1 (<0.1) | 0         | -           | -         | 1 (<0.1) | 0         |
| Fatigue                                          | 6 (<0.1) | 16 (0.1)  | 4 (<0.1)    | 13 (0.1)  | 2 (<0.1) | 3 (<0.1)  |
| Injection site erythema                          | 0        | 8 (<0.1)  | 0           | 5 (<0.1)  | 0        | 3 (<0.1)  |

|                                    |          |          |          |          |   |          |
|------------------------------------|----------|----------|----------|----------|---|----------|
| Injection site macule              | 0        | 6 (<0.1) | 0        | 3 (<0.1) | 0 | 3 (<0.1) |
| Injection site pain                | 1 (<0.1) | 3 (<0.1) | 1 (<0.1) | 3 (<0.1) | - | -        |
| Injection site swelling            | 0        | 3 (<0.1) | 0        | 2 (<0.1) | 0 | 1 (<0.1) |
| Chills                             | 0        | 2 (<0.1) | 0        | 2 (<0.1) | - | -        |
| Injection site lymphadenopathy     | 1 (<0.1) | 2 (<0.1) | 1 (<0.1) | 2 (<0.1) | - | -        |
| Injection site urticaria           | 0        | 2 (<0.1) | -        | -        | 0 | 2 (<0.1) |
| Injection site induration          | 1 (<0.1) | 1 (<0.1) | 1 (<0.1) | 1 (<0.1) | - | -        |
| Injection site rash                | 0        | 1 (<0.1) | 0        | 1 (<0.1) | - | -        |
| Malaise                            | 0        | 1 (<0.1) | 0        | 1 (<0.1) | - | -        |
| Pyrexia                            | 0        | 1 (<0.1) | -        | -        | 0 | 1 (<0.1) |
| Swelling face                      | 0        | 1 (<0.1) | 0        | 1 (<0.1) | - | -        |
| Asthenia                           | 1 (<0.1) | 0        | 1 (<0.1) | 0        | - | -        |
| Blood pressure increased           | 1 (<0.1) | 3 (<0.1) | 1 (<0.1) | 2 (<0.1) | 0 | 1 (<0.1) |
| Blood pressure diastolic increased | 0        | 1 (<0.1) | -        | -        | 0 | 1 (<0.1) |
| Blood pressure systolic increased  | 0        | 1 (<0.1) | 0        | 1 (<0.1) | - | -        |

Treatment-emergent adverse event (TEAE) is defined as any event not present before exposure to study vaccination or any event already present that worsens in intensity or frequency after exposure. Percentages are based on the number of participants in the safety subjects. The 95% CI was calculated using the Miettinen and Nurminen method. \*Occurred 28 days post-dose 2. MedDRA version 23.0. Data-cutoff date: March 26, 2021.

**Table S22. Unsolicited Adverse Events of Hypersensitivity, Overall Safety Set**

| Preferred term n (%)                    | Overall            |                      | ≥18 and <65 Years  |                      | ≥65 years         |                     |
|-----------------------------------------|--------------------|----------------------|--------------------|----------------------|-------------------|---------------------|
|                                         | Placebo<br>N=15162 | mRNA-1273<br>N=15184 | Placebo<br>N=11411 | mRNA-1273<br>N=11415 | Placebo<br>N=3751 | mRNA-1273<br>N=3769 |
| Participants reporting hypersensitivity | 278 (1.8)          | 336 (2.2)            | 217 (1.9)          | 248 (2.2)            | 61 (1.6)          | 88 (2.3)            |
| Allergic cough                          | 0                  | 2 (<0.1)             | 0                  | 2 (<0.1)             | -                 | -                   |
| Allergic sinusitis                      | 2 (<0.1)           | 2 (<0.1)             | 2 (<0.1)           | 2 (<0.1)             | -                 | -                   |
| Anaphylactic reaction                   | 2 (<0.1)           | 2 (<0.1)             | 2 (<0.1)           | 2 (<0.1)             | -                 | -                   |
| Angioedema                              | 3 (<0.1)           | 3 (<0.1)             | 2 (<0.1)           | 3 (<0.1)             | 1 (<0.1)          | 0                   |
| Bronchospasm                            | 1 (<0.1)           | 3 (<0.1)             | 1 (<0.1)           | 1 (<0.1)             | 0                 | 2 (<0.1)            |
| Conjunctivitis allergic                 | 2 (<0.1)           | 2 (<0.1)             | 1 (<0.1)           | 1 (<0.1)             | 1 (<0.1)          | 1 (<0.1)            |
| Dermatitis                              | 14 (<0.1)          | 10 (<0.1)            | 11 (<0.1)          | 7 (<0.1)             | 3 (<0.1)          | 3 (<0.1)            |
| Dermatitis allergic                     | 5 (<0.1)           | 3 (<0.1)             | 5 (<0.1)           | 3 (<0.1)             | -                 | -                   |
| Dermatitis atopic                       | 9 (<0.1)           | 6 (<0.1)             | 9 (<0.1)           | 3 (<0.1)             | 0                 | 3 (<0.1)            |
| Dermatitis bullous                      | 2 (<0.1)           | 0                    | 1 (<0.1)           | 0                    | 1 (<0.1)          | 0                   |
| Dermatitis contact                      | 41 (0.3)           | 34 (0.2)             | 28 (0.2)           | 26 (0.2)             | 13 (0.3)          | 8 (0.2)             |
| Drug hypersensitivity                   | 8 (<0.1)           | 12 (<0.1)            | 6 (<0.1)           | 8 (<0.1)             | 2 (<0.1)          | 4 (0.1)             |
| Eczema                                  | 11 (<0.1)          | 18 (0.1)             | 8 (<0.1)           | 18 (0.2)             | 3 (<0.1)          | 0                   |
| Eczema nummular                         | 1 (<0.1)           | 3 (<0.1)             | 0                  | 2 (<0.1)             | 1 (<0.1)          | 1 (<0.1)            |
| Exfoliative rash                        | 0                  | 1 (<0.1)             | 0                  | 1 (<0.1)             | -                 | -                   |
| Eye swelling                            | 5 (<0.1)           | 2 (<0.1)             | 4 (<0.1)           | 1 (<0.1)             | 1 (<0.1)          | 1 (<0.1)            |
| Hand dermatitis                         | 1 (<0.1)           | 2 (<0.1)             | 1 (<0.1)           | 2 (<0.1)             | -                 | -                   |
| Hypersensitivity                        | 9 (<0.1)           | 9 (<0.1)             | 7 (<0.1)           | 5 (<0.1)             | 2 (<0.1)          | 4 (0.1)             |
| Idiopathic urticaria                    | 1 (<0.1)           | 0                    | 1 (<0.1)           | 0                    | -                 | -                   |
| Incision site rash                      | 0                  | 1 (<0.1)             | 0                  | 1 (<0.1)             | 0                 | 6 (0.2)             |
| Injection related reaction              | 1 (<0.1)           | 1 (<0.1)             | 1 (<0.1)           | 1 (<0.1)             | -                 | -                   |
| Injection site rash                     | 1 (<0.1)           | 25 (0.2)             | 1 (<0.1)           | 19 (0.2)             | -                 | -                   |
| Injection site urticaria                | 1 (<0.1)           | 38 (0.3)             | 0                  | 27 (0.2)             | 1 (<0.1)          | 11 (0.3)            |
| Laryngeal oedema                        | 1 (<0.1)           | 1 (<0.1)             | 1 (<0.1)           | 1 (<0.1)             | -                 | -                   |
| Lip oedema                              | 0                  | 1 (<0.1)             | 0                  | 1 (<0.1)             | -                 | -                   |
| Lip swelling                            | 2 (<0.1)           | 6 (<0.1)             | 1 (<0.1)           | 5 (<0.1)             | 1 (<0.1)          | 1 (<0.1)            |
| Oropharyngeal blistering                | 0                  | 1 (<0.1)             | -                  | -                    | 0                 | 1 (<0.1)            |
| Palatal oedema                          | 1 (<0.1)           | 0                    | 1 (<0.1)           | 0                    | -                 | -                   |
| Perioral dermatitis                     | 3 (<0.1)           | 1 (<0.1)             | 3 (<0.1)           | 1 (<0.1)             | -                 | -                   |
| Periorbital oedema                      | 1 (<0.1)           | 1 (<0.1)             | 0                  | 1 (<0.1)             | 1 (<0.1)          | 0                   |
| Periorbital swelling                    | 3 (<0.1)           | 0                    | 2 (<0.1)           | 0                    | 1 (<0.1)          | 0                   |
| Pharyngeal swelling                     | 0                  | 1 (<0.1)             | -                  | -                    | 0                 | 1 (<0.1)            |
| Rash                                    | 47 (0.3)           | 44 (0.3)             | 42 (0.4)           | 32 (0.3)             | 5 (0.1)           | 12 (0.3)            |
| Rash erythematous                       | 4 (<0.1)           | 3 (<0.1)             | 3 (<0.1)           | 3 (<0.1)             | 1 (<0.1)          | 0                   |
| Rash follicular                         | 1 (<0.1)           | 0                    | 1 (<0.1)           | 0                    | -                 | -                   |
| Rash macular                            | 6 (<0.1)           | 8 (<0.1)             | 2 (<0.1)           | 3 (<0.1)             | 4 (0.1)           | 5 (0.1)             |
| Rash maculo-papular                     | 4 (<0.1)           | 9 (<0.1)             | 4 (<0.1)           | 7 (<0.1)             | 0                 | 2 (<0.1)            |
| Rash pruritic                           | 11 (<0.1)          | 6 (<0.1)             | 10 (<0.1)          | 4 (<0.1)             | 1 (<0.1)          | 2 (<0.1)            |
| Rash pustular                           | 0                  | 1 (<0.1)             | 0                  | 1 (<0.1)             | -                 | -                   |
| Rash vesicular                          | 1 (<0.1)           | 2 (<0.1)             | 1 (<0.1)           | 2 (<0.1)             | -                 | -                   |
| Rhinitis allergic                       | 26 (0.2)           | 21 (0.1)             | 18 (0.2)           | 15 (0.1)             | 8 (0.2)           | 6 (0.2)             |
| Serum sickness                          | 1 (<0.1)           | 0                    | 1 (<0.1)           | 0                    | -                 | -                   |
| Swelling face                           | 4 (<0.1)           | 6 (<0.1)             | 3 (<0.1)           | 6 (<0.1)             | 1 (<0.1)          | 0                   |
| Swelling of eyelid                      | 1 (<0.1)           | 4 (<0.1)             | 1 (<0.1)           | 3 (<0.1)             | 0                 | 1 (<0.1)            |
| Swollen tongue                          | 1 (<0.1)           | 2 (<0.1)             | 0                  | 1 (<0.1)             | 1 (<0.1)          | 1 (<0.1)            |
| Type IV hypersensitivity reaction       | 0                  | 1 (<0.1)             | -                  | -                    | 0                 | 1 (<0.1)            |
| Urticaria                               | 46 (0.3)           | 55 (0.4)             | 37 (0.3)           | 40 (0.4)             | 9 (0.2)           | 15 (0.4)            |
| Urticaria papular                       | 5 (<0.1)           | 3 (<0.1)             | 4 (<0.1)           | 3 (<0.1)             | 1 (<0.1)          | 0                   |
| Vaccination site rash                   | 0                  | 2 (<0.1)             | 0                  | 2 (<0.1)             | -                 | -                   |

Percentages are based on the number of safety subjects. MedDRA version 23.0. Hypersensitivity is identified through selected SMQ. Data-cutoff date: March 26, 2021.



**Table S23. Incidence of Dermal Filler Reaction Post-Vaccination by Preferred Term by Age Group, Safety Set**

| Preferred term n (%)                          | Overall   |           | ≥18 and <65 Years |           | ≥65 years |           |
|-----------------------------------------------|-----------|-----------|-------------------|-----------|-----------|-----------|
|                                               | Placebo   | mRNA-1273 | Placebo           | mRNA-1273 | Placebo   | mRNA-1273 |
|                                               | (N=15162) | (N=15184) | (N=11411)         | (N=11415) | (N=3751)  | (N=3769)  |
| Participants reporting dermal filler reaction | 14 (<0.1) | 20 (0.1)  | 9 (<0.1)          | 17 (0.1)  | 5 (0.1)   | 3 (<0.1)  |
| Eye swelling                                  | 5 (<0.1)  | 2 (<0.1)  | 4 (<0.1)          | 1 (<0.1)  | 1 (<0.1)  | 1 (<0.1)  |
| Lip oedema                                    | 0         | 1 (<0.1)  | 0                 | 1 (<0.1)  | -         | -         |
| Lip swelling                                  | 2 (<0.1)  | 6 (<0.1)  | 1 (<0.1)          | 5 (<0.1)  | 1 (<0.1)  | 1 (<0.1)  |
| Periorbital oedema                            | 1 (<0.1)  | 1 (<0.1)  | 0                 | 1 (<0.1)  | 1 (<0.1)  | 0         |
| Periorbital swelling                          | 3 (<0.1)  | 0         | 2 (<0.1)          | 0         | 1 (<0.1)  | 0         |
| Swelling face                                 | 4 (<0.1)  | 6 (<0.1)  | 3 (<0.1)          | 6 (<0.1)  | 1 (<0.1)  | 0         |
| Swelling of eyelid                            | 1 (<0.1)  | 4 (<0.1)  | 1 (<0.1)          | 3 (<0.1)  | 0         | 1 (<0.1)  |

Percentages are based on the number of safety participants. .MedDRA version 23.0.  
Data-cutoff date March 26, 2021.

**Table S24. Bell's Palsy in Overall Safety Set and By Age Group**

| Adverse events n (%)                                                                                                                                                                                                                                                                                                                                                                                                                                                                                                                                                                                                                                                                                                                                                                                                                                                                                                                                                                                                               | Placebo        | mRNA-1273      | Rate ratio        | Total          |
|------------------------------------------------------------------------------------------------------------------------------------------------------------------------------------------------------------------------------------------------------------------------------------------------------------------------------------------------------------------------------------------------------------------------------------------------------------------------------------------------------------------------------------------------------------------------------------------------------------------------------------------------------------------------------------------------------------------------------------------------------------------------------------------------------------------------------------------------------------------------------------------------------------------------------------------------------------------------------------------------------------------------------------|----------------|----------------|-------------------|----------------|
| <b>Overall</b>                                                                                                                                                                                                                                                                                                                                                                                                                                                                                                                                                                                                                                                                                                                                                                                                                                                                                                                                                                                                                     | <b>N=15162</b> | <b>N=15184</b> |                   | <b>N=30346</b> |
| Facial paralysis                                                                                                                                                                                                                                                                                                                                                                                                                                                                                                                                                                                                                                                                                                                                                                                                                                                                                                                                                                                                                   | 3 (<0.1)       | 8 (<0.1)       | 2.66 (0.77, 9.25) | 11 (<0.1)      |
| <b>≥18-&lt;65 yrs</b>                                                                                                                                                                                                                                                                                                                                                                                                                                                                                                                                                                                                                                                                                                                                                                                                                                                                                                                                                                                                              | <b>N=11411</b> | <b>N=11415</b> |                   | <b>N=22826</b> |
| Facial paralysis                                                                                                                                                                                                                                                                                                                                                                                                                                                                                                                                                                                                                                                                                                                                                                                                                                                                                                                                                                                                                   | 3 (<0.1)       | 5 (<0.1)*      | -                 | 8 (<0.1)       |
| <b>≥65 yrs</b>                                                                                                                                                                                                                                                                                                                                                                                                                                                                                                                                                                                                                                                                                                                                                                                                                                                                                                                                                                                                                     | <b>N=3751</b>  | <b>N=3769</b>  |                   | <b>N=7520</b>  |
| Facial paralysis                                                                                                                                                                                                                                                                                                                                                                                                                                                                                                                                                                                                                                                                                                                                                                                                                                                                                                                                                                                                                   | 0              | 3 (<0.1)†      | -                 | 3 (<0.1)       |
| <b>Serious</b>                                                                                                                                                                                                                                                                                                                                                                                                                                                                                                                                                                                                                                                                                                                                                                                                                                                                                                                                                                                                                     |                |                |                   |                |
| Facial paralysis                                                                                                                                                                                                                                                                                                                                                                                                                                                                                                                                                                                                                                                                                                                                                                                                                                                                                                                                                                                                                   | 0              | 1 (<0.1)       |                   | 1 (<0.1)       |
| Treatment-emergent adverse event (TEAE) defined as any event not present before exposure to study vaccination or any event already present that worsened in intensity or frequency after exposure. Percentages are based on the number of safety set participants. The rate ratio was calculated as the ratio of the percentage of participants who reported the event in mRNA-1273 divided by that in placebo; 95% CI was calculated using the Miettinen and Nurminen method.*1 AE severe (grade 3): male, 56 yrs, white, SARS-CoV-2 negative, not treatment-related, recovering/resolving, concomitant meds, follow-up time 2 <sup>nd</sup> dose=179 days. †2 AE severe grade 3: 1) female, 67 yrs, white, SAE criteria, not treatment-related, recovered/resolved, concomitant meds, follow-up time 2 <sup>nd</sup> dose=172 days and 2) male, 73 yrs, white, not treatment-related, recovered/resolved, concomitant meds, follow-up time 2 <sup>nd</sup> dose=172 days. MedDRA version 23.0. Data-cutoff date: March 26, 2021. |                |                |                   |                |

**Table S25. Thromboembolic Events in the Overall Safety Set and by Age Group**

| Preferred term n (%)                                  | Overall            |                      |                           | ≥18-65 yrs         |                      | ≥65 yrs           |                         |
|-------------------------------------------------------|--------------------|----------------------|---------------------------|--------------------|----------------------|-------------------|-------------------------|
|                                                       | Placebo<br>N=15162 | mRNA-1273<br>N=15184 | Rate<br>Ratio<br>(95% CI) | Placebo<br>N=11411 | mRNA-1273<br>N=11415 | Placebo<br>N=3751 | mRNA-<br>1273<br>N=3769 |
| Participants Reporting Embolic and Thrombotic Events* | 43 (0.3)           | 47 (0.3)             | -                         | 28 (0.2)           | 26 (0.2)             | 15 (0.4)          | 21 (0.6)                |
| Acute myocardial infarction                           | 6 (<0.1)           | 4 (<0.1)             | -                         | 2 (<0.1)           | 2 (<0.1)             | 4 (0.1)           | 2 (<0.1)                |
| Arterial occlusive disease                            | 0                  | 1 (<0.1)             | -                         | -                  | -                    | 0                 | 1 (<0.1)                |
| Axillary vein thrombosis                              | 0                  | 1 (<0.1)             | -                         | -                  | -                    | 0                 | 1 (<0.1)                |
| Blindness transient                                   | 0                  | 1 (<0.1)             | -                         | 0                  | 1 (<0.1)             | -                 | -                       |
| Carotid artery thrombosis                             | 0                  | 1 (<0.1)             | -                         | -                  | -                    | 0                 | 1 (<0.1)                |
| Cerebrovascular accident                              | 4 (<0.1)           | 7 (<0.1)             | 1.75 (0.6-5.6)            | 2 (<0.1)           | 4 (<0.1)             | 2 (<0.1)          | 3 (<0.1)                |
| Coronary artery occlusion                             | 0                  | 2 (<0.1)             | -                         | -                  | -                    | 0                 | 2 (<0.1)                |
| Deep vein thrombosis                                  | 6 (<0.1)           | 8 (<0.1)             | 1.33 (0.5-3.7)            | 4 (<0.1)           | 4 (<0.1)             | 2 (<0.1)          | 4 (0.1)                 |
| Deep vein thrombosis postoperative                    | 0                  | 1 (<0.1)             | -                         | 0                  | 1 (<0.1)             | -                 | -                       |
| Embolic stroke                                        | 0                  | 2 (<0.1)             | -                         | -                  | -                    | 0                 | 2 (<0.1)                |
| Embolism venous                                       | 0                  | 1 (<0.1)             | -                         | 0                  | 1 (<0.1)             | -                 | -                       |
| Hemiparesis                                           | 0                  | 1 (<0.1)             | -                         | 0                  | 1 (<0.1)             | -                 | -                       |
| Ischaemic stroke                                      | 1 (<0.1)           | 0                    | -                         | -                  | -                    | 1 (<0.1)          | 0                       |
| Myocardial infarction                                 | 9 (<0.1)           | 7 (<0.1)             | 0.78 (0.3-2.0)            | 6 (<0.1)           | 4 (<0.1)             | 3 (<0.1)          | 3 (<0.1)                |
| Peripheral arterial occlusive disease                 | 0                  | 1 (<0.1)             | -                         | 0                  | 1 (<0.1)             | 0                 | 1 (<0.1)                |
| Peripheral artery occlusion                           | 1 (<0.1)           | 1 (<0.1)             | -                         | 1 (<0.1)           | 0                    | 2 (<0.1)          | 2 (<0.1)                |
| Pulmonary embolism                                    | 7 (<0.1)           | 6 (<0.1)             | 0.86 (0.3-2.4)            | 5 (<0.1)           | 4 (<0.1)             | 2 (<0.1)          | 2 (<0.1)                |
| Pulmonary infarction                                  | 1 (<0.1)           | 0                    | -                         | 1 (<0.1)           | 0                    | -                 | -                       |
| Retinal infarction                                    | 1 (<0.1)           | 0                    | -                         | 0                  | 1 (<0.1)             | 1 (<0.1)          | 0                       |
| Stress cardiomyopathy                                 | 0                  | 1 (<0.1)             | -                         | -                  | -                    | 0                 | 1 (<0.1)                |
| Thrombophlebitis                                      | 0                  | 1 (<0.1)             | -                         | 0                  | 1 (<0.1)             | -                 | -                       |
| Thrombophlebitis superficial                          | 4 (<0.1)           | 2 (<0.1)             | -                         | 4 (<0.1)           | 2 (<0.1)             | -                 | -                       |
| Transient ischaemic attack                            | 4 (<0.1)           | 3 (<0.1)             | -                         | 4 (<0.1)           | 1 (<0.1)             | 0                 | 2 (<0.1)                |
| Venous thrombosis limb                                | 0                  | 1 (<0.1)             | -                         | 0                  | 1 (<0.1)             | -                 | -                       |
| Vertebral artery occlusion                            | 1 (<0.1)           | 0                    | -                         | -                  | -                    | 1 (<0.1)          | 0                       |

Percentages are based on the number of participants in the safety set. The rate ratio was calculated as the ratio of percentage of participants reporting the event in mRNA-1273 divided by that in placebo in the overall group. The 95% CI was calculated using the Miettinen and Nurminen method. \*Embolic and Thrombotic Events were identified through selected Standardized MedDRA Query. Data-cutoff date March 26, 2021.

**Table S26. Death summary in Blinded Phase**

|                                                                                                                                                                                                                                                                                                                                                                                                                                                                 | <b>Placebo<br/>N=15162</b> | <b>mRNA-1273<br/>N=15184</b> | <b>Total<br/>N=30346</b> |
|-----------------------------------------------------------------------------------------------------------------------------------------------------------------------------------------------------------------------------------------------------------------------------------------------------------------------------------------------------------------------------------------------------------------------------------------------------------------|----------------------------|------------------------------|--------------------------|
| Number of Deaths Total, n (%)                                                                                                                                                                                                                                                                                                                                                                                                                                   | 16 (0.1)                   | 16 (0.1)                     | 32 (0.1)                 |
| Cause of death, n                                                                                                                                                                                                                                                                                                                                                                                                                                               |                            |                              |                          |
| Symptomatic Covid-19                                                                                                                                                                                                                                                                                                                                                                                                                                            | 1                          | -                            | 1                        |
| Covid-19//SARS-CoV-2                                                                                                                                                                                                                                                                                                                                                                                                                                            | 2                          | 1†                           | 3                        |
| Intra-abdominal perforation                                                                                                                                                                                                                                                                                                                                                                                                                                     | 1                          | --                           | 1                        |
| Stage 4 pancreatic cancer                                                                                                                                                                                                                                                                                                                                                                                                                                       | 1                          | -                            | 1                        |
| Complication of amyotrophic lateral sclerosis                                                                                                                                                                                                                                                                                                                                                                                                                   | 1                          | -                            | 1                        |
| Myocardial infarction                                                                                                                                                                                                                                                                                                                                                                                                                                           | 4                          | 1                            | 5                        |
| Cardiopulmonary arrest                                                                                                                                                                                                                                                                                                                                                                                                                                          | 1                          | 2                            | 3                        |
| Unknown death (details unknown, pending autopsy, unknown origin/cause)                                                                                                                                                                                                                                                                                                                                                                                          | 2                          | 3                            | 5                        |
| Severe systemic inflammatory syndrome in the setting of CLL                                                                                                                                                                                                                                                                                                                                                                                                     | 1                          | -                            | 1                        |
| Committed suicide                                                                                                                                                                                                                                                                                                                                                                                                                                               | 1                          | 1                            | 2                        |
| Seizure                                                                                                                                                                                                                                                                                                                                                                                                                                                         | 1                          |                              | 1                        |
| End stage congestive heart failure                                                                                                                                                                                                                                                                                                                                                                                                                              | -                          | 1                            | 1                        |
| Cardiac arrest                                                                                                                                                                                                                                                                                                                                                                                                                                                  | -                          | 1                            | 1                        |
| Provisional diagnosis, sudden fatal event, likely myocardial infarction                                                                                                                                                                                                                                                                                                                                                                                         | -                          | 1                            | 1                        |
| Worsening metastatic hepatocellular carcinoma                                                                                                                                                                                                                                                                                                                                                                                                                   | -                          | 1                            | 1                        |
| Right lower lobe pulmonary nodule concerning for primary lung malignancy                                                                                                                                                                                                                                                                                                                                                                                        | -                          | 1                            | 1                        |
| GI bleed and multisystem organ failure and acute hypoxic respiratory failure                                                                                                                                                                                                                                                                                                                                                                                    | -                          | 1                            | 1                        |
| Head trauma                                                                                                                                                                                                                                                                                                                                                                                                                                                     | -                          | 1                            | 1                        |
| Death suspected due to coronary artery disease, probably to complications of diabetes mellitus                                                                                                                                                                                                                                                                                                                                                                  | -                          | 1                            | 1                        |
| Percentages based on participants in the safety set. †Participant with a medical history of liver disease and human immunodeficiency virus, had a death attributed to Covid-19 that occurred 119 days post-dose 1; however, did not receive a second dose and was not included in the analysis of the secondary endpoint for prevention of Covid-19 death as only deaths due to Covid-19 14 days after 2nd dose were analyzed. Data-cutoff date March 26, 2021. |                            |                              |                          |

**Table S27. Vaccine Efficacy for Primary and All Secondary Endpoints**

| Endpoint                                                                                                                                                                                                                                                                                                                                                                                                                                                                                                                                                                                                                                                                                                                                                                                                                                                                                                                                                                                                                                                                                                                                                                            | Placebo<br>N=14164 | mRNA-1273<br>N=14287              |
|-------------------------------------------------------------------------------------------------------------------------------------------------------------------------------------------------------------------------------------------------------------------------------------------------------------------------------------------------------------------------------------------------------------------------------------------------------------------------------------------------------------------------------------------------------------------------------------------------------------------------------------------------------------------------------------------------------------------------------------------------------------------------------------------------------------------------------------------------------------------------------------------------------------------------------------------------------------------------------------------------------------------------------------------------------------------------------------------------------------------------------------------------------------------------------------|--------------------|-----------------------------------|
| Covid-19*, Adjudication Assessments Starting 14 Days After Second Injection<br>Events (n)<br>Vaccine Efficacy (95% CI)*†<br>p-value‡                                                                                                                                                                                                                                                                                                                                                                                                                                                                                                                                                                                                                                                                                                                                                                                                                                                                                                                                                                                                                                                | 744                | 55<br>93.2 (91.0-94.8)<br><.0001‡ |
| Covid-19* Starting 14 Days After Second Injection<br>Events (n)<br>Vaccine Efficacy (95% CI)†                                                                                                                                                                                                                                                                                                                                                                                                                                                                                                                                                                                                                                                                                                                                                                                                                                                                                                                                                                                                                                                                                       | 751                | 55<br>93.2 (91.1-94.9)            |
| Severe Covid-19* Adjudication Assessments Starting 14 Days After Second Injection<br>Events (n)<br>Vaccine Efficacy (95% CI)†                                                                                                                                                                                                                                                                                                                                                                                                                                                                                                                                                                                                                                                                                                                                                                                                                                                                                                                                                                                                                                                       | 106                | 2<br>98.2 (92.8-99.6)             |
| Severe Covid-19* Starting 14 Days After Second Injection<br>Events (n)<br>Vaccine Efficacy (95% CI)†                                                                                                                                                                                                                                                                                                                                                                                                                                                                                                                                                                                                                                                                                                                                                                                                                                                                                                                                                                                                                                                                                | 118                | 3<br>97.6 (92.4-99.2)             |
| Secondary Definition of Covid-19* Starting 14 Days After Second Injection<br>Events (n)<br>Vaccine Efficacy (95% CI)†                                                                                                                                                                                                                                                                                                                                                                                                                                                                                                                                                                                                                                                                                                                                                                                                                                                                                                                                                                                                                                                               | 807                | 58<br>93.4 (91.4-94.9)            |
| Covid-19* Based on Adjudication Committee Assessments Starting 14 Days After First Injection<br>Events (n)<br>Vaccine Efficacy (95% CI)†                                                                                                                                                                                                                                                                                                                                                                                                                                                                                                                                                                                                                                                                                                                                                                                                                                                                                                                                                                                                                                            | 769                | 56<br>93.3 (91.1-94.9)            |
| Covid-19* Starting 14 Days After First Injection<br>Events (n)<br>Vaccine Efficacy (95% CI)†                                                                                                                                                                                                                                                                                                                                                                                                                                                                                                                                                                                                                                                                                                                                                                                                                                                                                                                                                                                                                                                                                        | 782                | 58<br>93.1 (91.0-94.7)            |
| Covid-19* Based on Adjudication Committee Assessments Starting 14 Days After Second Injection Regardless of Prior SARS-CoV-2 Infection<br>Events, n/N¶<br>Vaccine Efficacy (95% CI)†                                                                                                                                                                                                                                                                                                                                                                                                                                                                                                                                                                                                                                                                                                                                                                                                                                                                                                                                                                                                | 754/15166          | 58/15180<br>92.8 (90.6-94.5)      |
| Covid-19* Starting 14 Days After Second Injection Regardless of Prior SARS-CoV-2 Infection<br>Events, n/N¶<br>Vaccine Efficacy (95% CI)†                                                                                                                                                                                                                                                                                                                                                                                                                                                                                                                                                                                                                                                                                                                                                                                                                                                                                                                                                                                                                                            | 762/15166          | 58/15180<br>92.9 (90.7-94.6)      |
| Death Caused by Covid-19 Starting 14 Days After Second Injection<br>Events (n)<br>Vaccine Efficacy (95% CI)†                                                                                                                                                                                                                                                                                                                                                                                                                                                                                                                                                                                                                                                                                                                                                                                                                                                                                                                                                                                                                                                                        | 3                  | 0<br>100.0 (NE-100.0)             |
| SARS-CoV-2 Infection Regardless of Symptomatology and Severity Starting 14 Days After Second Injection<br>Events (n)§<br>Vaccine Efficacy (95% CI)†                                                                                                                                                                                                                                                                                                                                                                                                                                                                                                                                                                                                                                                                                                                                                                                                                                                                                                                                                                                                                                 | 1339               | 280<br>82.0 (79.5-84.2)           |
| Asymptomatic SARS-CoV-2 Infection Starting 14 Days After Second Injection<br>Events (n)§<br>Vaccine Efficacy (95% CI)†                                                                                                                                                                                                                                                                                                                                                                                                                                                                                                                                                                                                                                                                                                                                                                                                                                                                                                                                                                                                                                                              | 498                | 214<br>63.0 (56.6-68.5)           |
| *With censoring rules for efficacy analyses. Covid-19 case is based on eligible symptoms and positive RT-PCR within 14 days. If participant had positive RT-PCR at pre-dose 2 visit (day 29) without eligible symptoms with 14 days, or positive Elecsys at scheduled visits prior to becoming a Covid-19 case, the participant was censored at the date with positive RT-PCR or Elecsys. †Vaccine efficacy (VE), defined as 1 - hazard ratio (mRNA-1273 vs. placebo), and 95% CI were estimated using a stratified Cox proportional hazard model with Efron's method of tie handling and with the treatment group as a covariate, adjusting for stratification factor. For asymptomatic SARS-CoV-2 infection, VE and 95% CI were estimated using Fine and Gray's sub-distribution hazard model with disease cases as competing events and with the treatment group as a covariate, adjusting for stratification factor. ‡1-sided p-value from stratified Cox proportional hazard model to test the null hypothesis VE ≤0.3. §Includes participant decision visit data. ¶n and N are based on the number of participants in the Full Analysis Set. Data-cutoff date March 26, 2021. |                    |                                   |

**Table S28. Covid Case Summary Per-Protocol and mITT Definitions\***

|                                                                                                                                                                                                                                                                                                                                                                                                                                                                                                                                                                                                                                                                                                                                                                                                                                                                                                                                                                                                                                                                                                                                                                                                                                                                                                                                                                                                                                                                                                                                                                                                                                                                                                                                                                                                                                                                                                                                                                                                                                                                                                                                                               | Per-protocol population    |                              |                          | Modified intent-to-treat population |                              |                          |
|---------------------------------------------------------------------------------------------------------------------------------------------------------------------------------------------------------------------------------------------------------------------------------------------------------------------------------------------------------------------------------------------------------------------------------------------------------------------------------------------------------------------------------------------------------------------------------------------------------------------------------------------------------------------------------------------------------------------------------------------------------------------------------------------------------------------------------------------------------------------------------------------------------------------------------------------------------------------------------------------------------------------------------------------------------------------------------------------------------------------------------------------------------------------------------------------------------------------------------------------------------------------------------------------------------------------------------------------------------------------------------------------------------------------------------------------------------------------------------------------------------------------------------------------------------------------------------------------------------------------------------------------------------------------------------------------------------------------------------------------------------------------------------------------------------------------------------------------------------------------------------------------------------------------------------------------------------------------------------------------------------------------------------------------------------------------------------------------------------------------------------------------------------------|----------------------------|------------------------------|--------------------------|-------------------------------------|------------------------------|--------------------------|
|                                                                                                                                                                                                                                                                                                                                                                                                                                                                                                                                                                                                                                                                                                                                                                                                                                                                                                                                                                                                                                                                                                                                                                                                                                                                                                                                                                                                                                                                                                                                                                                                                                                                                                                                                                                                                                                                                                                                                                                                                                                                                                                                                               | Placebo<br>N=14164         | mRNA-1273<br>N=14287         | Estimated<br>VE (95% CI) | Placebo<br>N=14745                  | mRNA-1273<br>N=14746         | Estimated<br>VE (95% CI) |
| Symptomatic infections, 14 days post-injection two, n (%)                                                                                                                                                                                                                                                                                                                                                                                                                                                                                                                                                                                                                                                                                                                                                                                                                                                                                                                                                                                                                                                                                                                                                                                                                                                                                                                                                                                                                                                                                                                                                                                                                                                                                                                                                                                                                                                                                                                                                                                                                                                                                                     |                            |                              |                          |                                     |                              |                          |
| Covid-19 adjudicated cases                                                                                                                                                                                                                                                                                                                                                                                                                                                                                                                                                                                                                                                                                                                                                                                                                                                                                                                                                                                                                                                                                                                                                                                                                                                                                                                                                                                                                                                                                                                                                                                                                                                                                                                                                                                                                                                                                                                                                                                                                                                                                                                                    | 744 (5.3)                  | 55 (0.4)                     | 93.2<br>(91.0-94.8)      | 751 (5.1)                           | 58 (0.4)                     | 92.8<br>(90.6-94.5)      |
| Covid-19 cases (adjudicated and any)                                                                                                                                                                                                                                                                                                                                                                                                                                                                                                                                                                                                                                                                                                                                                                                                                                                                                                                                                                                                                                                                                                                                                                                                                                                                                                                                                                                                                                                                                                                                                                                                                                                                                                                                                                                                                                                                                                                                                                                                                                                                                                                          | 751 (5.3)                  | 55 (0.4)                     | 93.2<br>(91.1-94.9)      | 759 (5.1)                           | 58 (0.4)                     | 92.9<br>(90.7-94.6)      |
| Secondary definition of Covid-19                                                                                                                                                                                                                                                                                                                                                                                                                                                                                                                                                                                                                                                                                                                                                                                                                                                                                                                                                                                                                                                                                                                                                                                                                                                                                                                                                                                                                                                                                                                                                                                                                                                                                                                                                                                                                                                                                                                                                                                                                                                                                                                              | 807 (5.7)                  | 58 (0.4)                     | 93.4<br>(91.4-94.9)      | 816 (5.5)                           | 61 (0.4)                     | 93.1<br>(91.0-94.7)      |
| Severe Covid-19 cases                                                                                                                                                                                                                                                                                                                                                                                                                                                                                                                                                                                                                                                                                                                                                                                                                                                                                                                                                                                                                                                                                                                                                                                                                                                                                                                                                                                                                                                                                                                                                                                                                                                                                                                                                                                                                                                                                                                                                                                                                                                                                                                                         | 106 (0.7)                  | 2 (0)                        | 97.6<br>(92.4-99.2)      | 107 (0.7)                           | 2 (0)                        | 98.2<br>(92.8-99.6)      |
| Asymptomatic infection†                                                                                                                                                                                                                                                                                                                                                                                                                                                                                                                                                                                                                                                                                                                                                                                                                                                                                                                                                                                                                                                                                                                                                                                                                                                                                                                                                                                                                                                                                                                                                                                                                                                                                                                                                                                                                                                                                                                                                                                                                                                                                                                                       | 498 (3.5)                  | 214 (1.5)                    | 63.0<br>(56.6-68.5)      | 500 (3.4)                           | 217 (1.5)                    | 62.3<br>(55.7-67.8)      |
| <b>Asymptomatic infections (number of events) after randomization, n</b>                                                                                                                                                                                                                                                                                                                                                                                                                                                                                                                                                                                                                                                                                                                                                                                                                                                                                                                                                                                                                                                                                                                                                                                                                                                                                                                                                                                                                                                                                                                                                                                                                                                                                                                                                                                                                                                                                                                                                                                                                                                                                      | <b>Placebo<br/>N=14164</b> | <b>mRNA-1273<br/>N=14287</b> |                          | <b>Placebo<br/>N=14745</b>          | <b>mRNA-1273<br/>N=14746</b> |                          |
| Asymptomatic infections total, n (%)                                                                                                                                                                                                                                                                                                                                                                                                                                                                                                                                                                                                                                                                                                                                                                                                                                                                                                                                                                                                                                                                                                                                                                                                                                                                                                                                                                                                                                                                                                                                                                                                                                                                                                                                                                                                                                                                                                                                                                                                                                                                                                                          | 567 (4.0)‡                 | 246 (1.7)                    | -                        | 583 (4.0)‡                          | 253 (1.7)                    | -                        |
| Infections detected at day 29                                                                                                                                                                                                                                                                                                                                                                                                                                                                                                                                                                                                                                                                                                                                                                                                                                                                                                                                                                                                                                                                                                                                                                                                                                                                                                                                                                                                                                                                                                                                                                                                                                                                                                                                                                                                                                                                                                                                                                                                                                                                                                                                 | 69                         | 32                           | -                        | 75                                  | 33                           | -                        |
| RT-PCR only                                                                                                                                                                                                                                                                                                                                                                                                                                                                                                                                                                                                                                                                                                                                                                                                                                                                                                                                                                                                                                                                                                                                                                                                                                                                                                                                                                                                                                                                                                                                                                                                                                                                                                                                                                                                                                                                                                                                                                                                                                                                                                                                                   | 35                         | 12                           | -                        | 36                                  | 13                           | -                        |
| Seroconversion only                                                                                                                                                                                                                                                                                                                                                                                                                                                                                                                                                                                                                                                                                                                                                                                                                                                                                                                                                                                                                                                                                                                                                                                                                                                                                                                                                                                                                                                                                                                                                                                                                                                                                                                                                                                                                                                                                                                                                                                                                                                                                                                                           | 26                         | 17                           | -                        | 27                                  | 17                           | -                        |
| Both RT-PCR and seroconversion                                                                                                                                                                                                                                                                                                                                                                                                                                                                                                                                                                                                                                                                                                                                                                                                                                                                                                                                                                                                                                                                                                                                                                                                                                                                                                                                                                                                                                                                                                                                                                                                                                                                                                                                                                                                                                                                                                                                                                                                                                                                                                                                | 8                          | 3                            | -                        | 12                                  | 3                            | -                        |
| Infections detected at day 57 (seroconversion)                                                                                                                                                                                                                                                                                                                                                                                                                                                                                                                                                                                                                                                                                                                                                                                                                                                                                                                                                                                                                                                                                                                                                                                                                                                                                                                                                                                                                                                                                                                                                                                                                                                                                                                                                                                                                                                                                                                                                                                                                                                                                                                | 31                         | 13                           | -                        | 34                                  | 14                           | -                        |
| Infections detected at day 209 (seroconversion)                                                                                                                                                                                                                                                                                                                                                                                                                                                                                                                                                                                                                                                                                                                                                                                                                                                                                                                                                                                                                                                                                                                                                                                                                                                                                                                                                                                                                                                                                                                                                                                                                                                                                                                                                                                                                                                                                                                                                                                                                                                                                                               | 2                          | 0                            | -                        | 2                                   | 0                            | -                        |
| Infections detected at PDV                                                                                                                                                                                                                                                                                                                                                                                                                                                                                                                                                                                                                                                                                                                                                                                                                                                                                                                                                                                                                                                                                                                                                                                                                                                                                                                                                                                                                                                                                                                                                                                                                                                                                                                                                                                                                                                                                                                                                                                                                                                                                                                                    | 463                        | 201                          | -                        | 470                                 | 206                          | -                        |
| RT-PCR only                                                                                                                                                                                                                                                                                                                                                                                                                                                                                                                                                                                                                                                                                                                                                                                                                                                                                                                                                                                                                                                                                                                                                                                                                                                                                                                                                                                                                                                                                                                                                                                                                                                                                                                                                                                                                                                                                                                                                                                                                                                                                                                                                   | 157                        | 153                          | -                        | 158                                 | 156                          | -                        |
| Seroconversion only                                                                                                                                                                                                                                                                                                                                                                                                                                                                                                                                                                                                                                                                                                                                                                                                                                                                                                                                                                                                                                                                                                                                                                                                                                                                                                                                                                                                                                                                                                                                                                                                                                                                                                                                                                                                                                                                                                                                                                                                                                                                                                                                           | 191                        | 41                           | -                        | 193                                 | 43                           | -                        |
| Both RT-PCR and seroconversion                                                                                                                                                                                                                                                                                                                                                                                                                                                                                                                                                                                                                                                                                                                                                                                                                                                                                                                                                                                                                                                                                                                                                                                                                                                                                                                                                                                                                                                                                                                                                                                                                                                                                                                                                                                                                                                                                                                                                                                                                                                                                                                                | 115                        | 7                            | -                        | 119                                 | 7                            | -                        |
| <p>PDV=participant decision visit. Reverse transcriptase polymerase chain reaction (RT-PCR) test and Elecsys binding antibody (bAb) against SARS-CoV-2 nucleocapsid assay (seroconversion) results at post-baseline scheduled visits are considered in the case definition. *Only includes cases defined in the blinded phase and does not include cases defined in the open-label phase. Includes cases that occurred at the participant decision visit (PDV) before or on the efficacy data cutoff date of March 26, 2021. Asymptomatic SARS-CoV-2 infection (PP and mITT sets) was defined as absence of symptoms (no Covid-19 symptom for either primary efficacy Covid-19 end point, or secondary definition of Covid-19) and infections as detected by at least either seroconversion (bAb specific to SARS-CoV-2 nucleocapsid) at scheduled visits (months 1, 2, 7, 13 and 25 if applicable in Part A, participant decision visit and etc. in Part B) when blood samples for immunogenicity were collected, or by RT-PCR at scheduled visits such as pre-dose 2 at day 29 in Part A. Both RT-PCR test and bAb against SARS-CoV-2 nucleocapsid were considered, and the date of documented asymptomatic infection was the earlier date of seroconversion due to infection, or positive RT-PCR at scheduled visits, with the absence of symptoms. Participants who had a symptomatic infection (Covid-19 or secondary definition of Covid-19) prior to an asymptomatic infection were censored at the time of symptomatic infection for the analysis of asymptomatic infection. †For the primary analysis, documented asymptomatic infection was counted starting 14 days after the 2nd injection, which required seroconversion at months 2 (day 57, 209 or PDV). As disease cases (Covid-19 or secondary definition of Covid-19) are competing events for asymptomatic SARS-CoV-2 infections, competing risk method was used to estimate the vaccine efficacy of mRNA-1273, specifically, Fine and Gray's (FG) sub-distribution hazard model was used. ‡2 participants with data detected at unscheduled visit. Data cut-off date: March 26, 2021.</p> |                            |                              |                          |                                     |                              |                          |

**Table S29. Vaccine Efficacy to Prevent Covid-19\* in Subgroups Assessed**

| Subgroup                                  | n Events/N†        |                      | Vaccine Efficacy %<br>(95% CI) |
|-------------------------------------------|--------------------|----------------------|--------------------------------|
|                                           | Placebo<br>N=14164 | mRNA-1273<br>N=14287 |                                |
| Overall                                   | 744/14164          | 55 /14287            | 93.2 (91.0-94.8)               |
| Age Years                                 |                    |                      |                                |
| ≥18 and <65                               | 644/10569          | 46/10661             | 93.4 (91.1-95.1)               |
| ≥65                                       | 100/3595           | 9/3626               | 91.5 (83.2-.95.7)              |
| ≥65 and <75                               | 81/2898            | 9/2990               | 89.7 (79.6-94.9)               |
| ≥75                                       | 19/697             | 0/636                | 100.0 (NE-100.0)               |
| Sex                                       |                    |                      |                                |
| Male                                      | 378/7494           | 30/7439              | 92.5 (89.1-94.8)               |
| Female                                    | 366/6670           | 25/6848              | 93.8 (90.7-95.9)               |
| Age and Health Risk for Severe Covid-19‡  |                    |                      |                                |
| ≥18 and <65 years and not at risk         | 501/8428           | 35/8464              | 93.5 (90.9-95.4)               |
| ≥18 and <65 years and at risk             | 143/ 2141          | 11/2197              | 93.0 (87.0-96.2)               |
| ≥65 years                                 | 100/3595           | 9/3626               | 91.5 (83.2-95.7)               |
| At Risk for Severe Covid-19               |                    |                      |                                |
| Yes                                       | 177/3212           | 16/3283              | 91.7 (86.2-95.0)               |
| No                                        | 567/10952          | 39/11004             | 93.6 (91.2-95.4)               |
| Race and Ethnicity                        |                    |                      |                                |
| Non-Hispanic White§                       | 488/8998           | 39/9123              | 92.6 (89.8-94.7)               |
| Communities of Color                      | 256/5141           | 16/5139              | 94.2 (90.3-96.5)               |
| Race                                      |                    |                      |                                |
| White                                     | 631/11273          | 48/11391             | 93.0 (90.6-94.7)               |
| Black or African American                 | 41/1352            | 4/1,391              | 91.1 (75.2-96.8)               |
| Asian                                     | 29/700             | 1/628                | 96.6 (74.2-99.5)               |
| American Indian or Alaska Native          | 5/113              | 0/109                | 100.0 (NE-100.0)               |
| Native Hawaiian or Other Pacific Islander | 0/31               | 0/36                 | NE (NE-NE)                     |
| Other                                     | 19 /274            | 2 / 295              | 95.8 (68.6-99.4)               |
| Multiple                                  | 8/304              | 1/282                | 88.1 (4.6-98.5)                |
| Not Reported/Unknown                      | 11/127             | 0/146                | 100.0 (NE-100.0)               |
| Ethnicity                                 |                    |                      |                                |
| Hispanic or Latino                        | 177/2,787          | 10/2831              | 94.8 (90.2-97.3)               |
| Not Hispanic or Latino                    | 563/11,249         | 45/11,322            | 92.6 (90.0-94.5)               |
| Not reported                              | 2/76               | 0/99                 | 100.0 (NE-100.0)               |
| Unknown                                   | 2/52               | 0/35                 | 100.0 (NE-100.0)               |
| Comorbidities                             |                    |                      |                                |
| Chronic Lung Disease                      | 30/692             | 4/675                | 87.2 (63.8-95.5)               |
| Significant Cardiac Disease               | 30/696             | 4/726                | 88.0 (65.9-95.8)               |
| Severe Obesity (>40 kg/m2)                | 75/980             | 7/1009               | 91.4 (81.4-96.0)               |
| Diabetes                                  | 72/1363            | 3/1,402              | 96.2 (87.9-98.8)               |
| Liver Disease                             | 5/90               | 1/100                | 81.0 (-64.8-97.8)              |
| HIV                                       | 4/82               | 0/85                 | 100.0 (NE-100)                 |
| Occupational risk                         |                    |                      |                                |
| No Risk                                   | 72/2480            | 4/2541               | 94.8 (85.8-98.1)               |
| Healthcare workers                        | 209/3261           | 13/361               | 94.4 (90.3-96.8)               |
| Emergency response                        | 25/273             | 2/287                | 93.0 (70.6-98.4)               |
| Retail and restaurant operations          | 58/875             | 5/870                | 92.0 (80.0-96.8)               |
| Manufacturing and Production Operations   | 21/390             | 2/390                | 90.9 (61.0-97.9)               |
| Warehouse Shipping and Fulfillment        | 13/158             | 2/174                | 86.1 (38.4-96.9)               |
| Centers                                   |                    |                      |                                |
| Transportation and Delivery Services      | 22/428             | 2/428                | 91.3 (62.8-97.9)               |
| Border Protection and Military Personnel  | 3/66               | 0/64                 | 100.0 (NE-100)                 |
| Personal Care and In-Home Services        | 29/413             | 2/417                | 93.5 (72.8-98.5)               |

|                                           |          |         |                  |
|-------------------------------------------|----------|---------|------------------|
| Hospitality and Tourism Workers           | 10/200   | 3/214   | 74.1 (5.6-92.9)  |
| Pastoral, Social or Public Health Workers | 36/485   | 1/506   | 97.6 (82.2-99.7) |
| Educators and Students                    | 77/1478  | 7/1476  | 91.3 (81.2-96.0) |
| Other                                     | 237/4506 | 23/4586 | 91.3 (81.2-96.0) |

\*With the censoring rules for efficacy analyses. Covid-19 case is based on eligible symptoms and positive RT-PCR within 14 days. If a participant had positive RT-PCR at pre-dose 2 visit (Day 29) without eligible symptoms with 14 days, or positive Elecsys at scheduled visits prior to becoming a Covid-19 case, the subject is censored at the date with positive RT-PCR or Elecsys. Vaccine efficacy, defined as 1 - hazard ratio (mRNA-1273 vs. placebo), and 95% CI were estimated using a stratified Cox proportional hazard model with Efron's method of tie handling and with the treatment group as a covariate, adjusting for stratification factor if applicable. †Based on the number of participants assessed in each subgroup. ‡Age and health risk for severe Covid-19 are derived from age and risk factor collected on case report form (CRF). §White is defined as White and non-Hispanic, and Communities of Color includes all the others whose race or ethnicity is not unknown, unreported or missing. Data-cutoff date: March 26, 2021.



**Table S30. Cases of Covid-19 and SARS-CoV-2 Infection Post-randomization by Time Periods, Per-Protocol Set**

|                                                                                                                                                                                                                                                                                                                                                                                                                                | Covid-19* adjudicated cases |                      | Covid-19* cases    |                      | Severe Covid-19 adjudicated cases |                      | SARS-CoV-2 infection regardless of symptomology/severity |                      |
|--------------------------------------------------------------------------------------------------------------------------------------------------------------------------------------------------------------------------------------------------------------------------------------------------------------------------------------------------------------------------------------------------------------------------------|-----------------------------|----------------------|--------------------|----------------------|-----------------------------------|----------------------|----------------------------------------------------------|----------------------|
|                                                                                                                                                                                                                                                                                                                                                                                                                                | Placebo<br>N=14164          | mRNA-1273<br>N=14287 | Placebo<br>N=14164 | mRNA-1273<br>N=14287 | Placebo<br>N=14164                | mRNA-1273<br>N=14287 | Placebo<br>N=14164                                       | mRNA-1273<br>N=14287 |
| <b>Cases</b>                                                                                                                                                                                                                                                                                                                                                                                                                   |                             |                      |                    |                      |                                   |                      |                                                          |                      |
| n (%)                                                                                                                                                                                                                                                                                                                                                                                                                          | 769 (5.4)                   | 56 (0.4)             | 782 (5.5)          | 58 (0.4)             | 107 (0.8)                         | 2 (<0.1)             | 1434 (10.1)                                              | 313 (2.2)            |
| Events (n)                                                                                                                                                                                                                                                                                                                                                                                                                     |                             |                      |                    |                      |                                   |                      |                                                          |                      |
| Randomization up to 14 days after first injection                                                                                                                                                                                                                                                                                                                                                                              | 0                           | 0                    | 0                  | 0                    | 0                                 | 0                    | 0                                                        | 0                    |
| ≥14 up to 21 days after first injection                                                                                                                                                                                                                                                                                                                                                                                        | 0                           | 0                    | 0                  | 0                    | 0                                 | 0                    | 1                                                        | 0                    |
| ≥21 days after first injection up to second injection                                                                                                                                                                                                                                                                                                                                                                          | 1                           | 0                    | 3                  | 0                    | 0                                 | 0                    | 3                                                        | 0                    |
| Second injection up to 7 days after second injection                                                                                                                                                                                                                                                                                                                                                                           | 11                          | 1                    | 12                 | 3                    | 0                                 | 0                    | 78                                                       | 33                   |
| ≥7 up to 14 days after second injection                                                                                                                                                                                                                                                                                                                                                                                        | 13                          | 0                    | 16                 | 0                    | 1                                 | 0                    | 13                                                       | 0                    |
| ≥14 up to 28 days after second injection                                                                                                                                                                                                                                                                                                                                                                                       | 49                          | 4                    | 48                 | 4                    | 7                                 | 0                    | 63                                                       | 9                    |
| ≥28 up to 56 days after second injection                                                                                                                                                                                                                                                                                                                                                                                       | 178                         | 15                   | 181                | 14                   | 25                                | 0                    | 217                                                      | 28                   |
| ≥56 up to 84 days after second injection                                                                                                                                                                                                                                                                                                                                                                                       | 228                         | 12                   | 229                | 13                   | 33                                | 2                    | 290                                                      | 28                   |
| ≥84 up to 112 days after second injection                                                                                                                                                                                                                                                                                                                                                                                      | 206                         | 16                   | 207                | 16                   | 28                                | 0                    | 316                                                      | 58                   |
| ≥112 days after second injection                                                                                                                                                                                                                                                                                                                                                                                               | 83                          | 8                    | 86                 | 8                    | 13                                | 0                    | 453                                                      | 157                  |
| *With censoring rules for efficacy analyses. Covid-19 case was based on eligible symptoms and positive RT-PCR within 14 days. If a participant had positive RT-PCR at pre-dose 2 visit (day 29) without eligible symptoms with 14 days, or positive Elecsys at scheduled visits prior to becoming a Covid-19 case, the participant was censored at the date with positive RT-PCR or Elecsys. Data-cutoff date: March 26, 2021. |                             |                      |                    |                      |                                   |                      |                                                          |                      |

**Table S31. Covid-19 Symptoms and Severity in Adjudicated Covid-19 and Severe Covid-19 Cases, Per-protocol Set**

| Covid-19 n (%)                                                      | All Covid-19 cases* |                    | Severe Covid-19 cases |                  |
|---------------------------------------------------------------------|---------------------|--------------------|-----------------------|------------------|
|                                                                     | Placebo<br>N=744    | mRNA-1273<br>N=55* | Placebo<br>N=106      | mRNA-1273<br>N=2 |
| Respiratory symptom                                                 |                     |                    |                       |                  |
| Clinical evidence of pneumonia                                      | 18 (2.4)            | 0                  | 16 (15.1)             | 0                |
| Cough                                                               | 632 (84.9)          | 35 (63.6)          | 100 (94.3)            | 2 (100)          |
| Difficulty breathing                                                | 185 (24.9)          | 10 (18.2)          | 49 (46.2)             | 2 (100)          |
| Radiographical evidence of pneumonia                                | 16 (2.2)            | 0                  | 14 (13.2)             | 0                |
| Shortness of breath                                                 | 275 (37.0)          | 19 (34.5)          | 74 (69.8)             | 1 (50.0)         |
| Systemic symptom                                                    |                     |                    |                       |                  |
| Body aches                                                          | 464 (62.4)          | 24 (43.6)          | 83 (78.3)             | 1 (50.0)         |
| Chills                                                              | 378 (50.8)          | 17 (30.9)          | 65 (61.3)             | 1 (50.0)         |
| Diarrhea                                                            | 282 (37.9)          | 16 (29.1)          | 55 (51.9)             | 2 (100)          |
| Fatigue                                                             | 620 (83.3)          | 39 (70.9)          | 96 (90.6)             | 1 (50.0)         |
| Fever†                                                              | 175 (23.5)          | 5 (9.1)            | 45 (42.5)             | 0                |
| Headache                                                            | 583 (78.4)          | 47 (85.5)          | 92 (86.8)             | 1 (50.0)         |
| Muscle aches (myalgia)                                              | 409 (55.0)          | 23 (41.8)          | 76 (71.7)             | 1 (50.0)         |
| Nasal congestion                                                    | 591 (79.4)          | 43 (78.2)          | 79 (74.5)             | 2 (100)          |
| Nausea                                                              | 272 (36.6)          | 15 (27.3)          | 49 (46.2)             | 2 (100)          |
| New loss of smell                                                   | 445 (59.8)          | 18 (32.7)          | 57 (53.8)             | 0                |
| New loss of taste                                                   | 416 (55.9)          | 14 (25.5)          | 58 (54.7)             | 0                |
| Runny nose (rhinorrhea)                                             | 489 (65.7)          | 39 (70.9)          | 72 (67.9)             | 2 (100)          |
| Sore throat                                                         | 386 (51.9)          | 34 (61.8)          | 52 (49.1)             | 2 (100)          |
| Vomiting                                                            | 79 (10.6)           | 3 (5.5)            | 23 (21.7)             | 1 (50.0)         |
| Number of participants with any severe symptom                      | 112 (15.1)          | 3 (5.5)            | 103 (97.2)            | (100)            |
| Acute renal dysfunction                                             | 2 (0.3)             | 0                  | 2 (1.9)               | 0                |
| Acute Respiratory Distress Syndrome                                 | 2 (0.3)             | 0                  | 2 (1.9)               | 0                |
| ECMO                                                                | 1 (0.1)             | 0                  | 1 (0.9)               | 0                |
| High-flow oxygen                                                    | 6 (0.8)             | 1 (1.8)            | 6 (5.7)               | 1 (50.0)         |
| Mechanical ventilation                                              | 2 (0.3)             | 0                  | 2 (1.9)               | 0                |
| Non-Invasive ventilation                                            | 2 (0.3)             | 0                  | 2 (1.9)               | 0                |
| Admission to an intensive care unit due to SARS-CoV-2               | 4 (0.5)             | 0                  | 5 (4.7)               | 0                |
| Hospitalization due to SARS-CoV-2                                   | 27 (3.6)            | 1 (1.8)            | 22 (20.8)             | 1 (50.0)         |
| Heart Rate ≥125 beats per minute                                    | 5 (0.7)             | 0                  | 5 (4.7)               | 0                |
| Hepatic dysfunction                                                 | 0                   | 0                  | 0                     | 0                |
| Neurologic dysfunction                                              | 2 (0.3)             | 0                  | 2 (1.9)               | 0                |
| Oxygen saturation ≤93‡                                              | 97 (13.0)           | 3 (5.5)            | 94 (88.7)             | 2 (100)          |
| Oxygen saturation SpO2 ≤93% on room air at sea level                | 98 (13.2)           | 3 (5.5)            | 94 (88.7)             | 2 (100)          |
| PaO2/FIO2 ratio <300 mmHg                                           | 1 (0.1)             | 0                  | 1 (0.9)               | 0                |
| Respiratory failure                                                 | 4 (0.5)             | 1 (1.8)            | 5 (4.7)               | 1 (50.0)         |
| Respiratory rate ≥30 per minute                                     | 4 (0.5)             | 0                  | 3 (2.8)               | 0                |
| Systolic blood pressure <90 mmHg, diastolic blood Pressure <60 mmHg | 14 (1.9)            | 0                  | 9 (8.5)               | 0                |
| Vasopressors required                                               | 0                   | 0                  | 0                     | 0                |
| Deaths                                                              | 4 (0.5)             | 0                  | 2 (1.9)               | 0                |

\* Adjudicated cases with the censoring rules for efficacy analyses. Covid-19 case based on eligible symptoms and positive RT-PCR within 14 days. If a participant had positive RT-PCR at pre-dose 2 visit (day 29) without eligible symptoms with 14 days, or positive Elecsys at scheduled visits prior to becoming a Covid-19 case, the participant was censored at the date with positive RT-PCR or Elecsys. All symptoms reported are included, regardless of relationship with the positive RT-PCR test used to define the COVID-19 case. Note symptoms are shown for participants with all cases of 196 Covid-19 and those 30 that were considered severe cases. All symptoms reported are included, regardless of relationship with the positive RT-PCR test used to define the case of Covid-19 in PP set. Participants can be counted in more than one category. †Derived based on temperature collected on case report form (CRF) symptoms. ‡Derived based on oxygen saturation collected on CRF symptom log page. Data-cutoff date: March 26, 2021.

**Table S32. Baseline Characteristics of Participants with Covid-19\* Based on Adjudicated Cases, Per-protocol Set**

| Characteristics n (%)                           | All Covid-19 cases* |                   | Severe Covid-19* cases |                  |
|-------------------------------------------------|---------------------|-------------------|------------------------|------------------|
|                                                 | Placebo<br>N=744    | mRNA-1273<br>N=55 | Placebo<br>N=106       | mRNA-1273<br>N=2 |
| Age, years                                      |                     |                   |                        |                  |
| Mean (range)                                    | 48 (18-87)          | 49 (24-74)        | 53 (22-85)             | 63 (53-72)       |
| 18-65                                           | 44 (18-64)          | 45 (24 -64)       | 47 (22-63)             | 53 (53-53)       |
| ≥65 ys                                          | 71 (65-87)          | 70 (66-74)        | 71 (65-85)             | 72 (72-72)       |
| Sex, n (%)                                      |                     |                   |                        |                  |
| Male                                            | 378 (50.8)          | 30 (54.5)         | 50 (47.2)              | 1 (50.0)         |
| Female                                          | 366 (49.2)          | 25 (45.5)         | 56 (52.8)              | 1 (50.0)         |
| Age and Health Risk for Severe Covid-19†        |                     |                   |                        |                  |
| ≥18 and <65 Years and Not at Risk               | 482 (64.8)          | 34 (61.8)         | 43 (40.6)              | 1 (50.0)         |
| ≥18 and <65 Years and at Risk                   | 162 (21.8)          | 12 (21.8)         | 33 (31.1)              | 0                |
| ≥65 Years                                       | 100 (13.4)          | 9 (16.4)          | 30 (28.3)              | 1 (50.0)         |
| Risk Factor for Severe Covid-19 at Screening‡   |                     |                   |                        |                  |
| Chronic Lung Disease                            | 30 (4.0)            | 4 (7.3)           | 9 (8.5)                | 1 (50.0)         |
| Significant Cardiac Disease                     | 30 (4.0)            | 4 (7.3)           | 9 (8.5)                | 0                |
| Severe Obesity                                  | 75 (10.1)           | 7 (12.7)          | 15 (14.2)              | 0                |
| Diabetes                                        | 72 (9.7)            | 3 (5.5)           | 22 (20.8)              | 0                |
| Liver Disease                                   | 5 (0.7)             | 1 (1.8)           | 1 (0.9)                | 0                |
| Human Immunodeficiency Virus Infection          | 4 (0.5)             | 0                 | 1 (0.9)                | 0                |
| At Risk for Severe Covid-19 at Screening, n (%) |                     |                   |                        |                  |
| Yes                                             | 177 (23.8)          | 16 (29.1)         | 44 (41.5)              | 1 (50.0)         |
| One Risk Factor for Severe Covid-19             | 143 (19.2)          | 14 (25.5)         | 32 (30.2)              | 1 (50.0)         |
| Two or More Risk Factors for Severe Covid-19    | 34 (4.6)            | 2 (3.6)           | 12 (11.3)              | 0                |
| No                                              | 567 (76.2)          | 39 (70.9)         | 62 (58.5)              | 1 (50.0)         |
| Age and Risk for Severe Covid-19, n (%)§        |                     |                   |                        |                  |
| ≥18 and <65 Years and Not at Risk               | 501 (67.3)          | 35 (63.6)         | 46 (43.4)              | 1 (50.0)         |
| ≥18 and <65 Years and at Risk                   | 143 (19.2)          | 11 (20.0)         | 30 (28.3)              | 0                |
| ≥65 Years and Not at Risk                       | 66 (8.9)            | 4 (7.3)           | 16 (15.1)              | 0                |
| ≥65 Years and at Risk                           | 34 (4.6)            | 5 (9.1)           | 14 (13.2)              | 1 (50.0)         |
| Race, n (%)                                     |                     |                   |                        |                  |
| White                                           | 631 (84.8)          | 48 (87.3)         | 86 (81.1)              | 2 (100)          |
| Black or African American                       | 41 (5.5)            | 4 (7.3)           | 6 (5.7)                | 0                |
| Asian                                           | 29 (3.9)            | 1 (1.8)           | 4 (3.8)                | 0                |
| American Indian or Alaska Native                | 5 (0.7)             | 0                 | 0                      | 0                |
| Native Hawaiian or Other Pacific Islander       | 0                   | 0                 | 0                      | 0                |
| Multiracial                                     | 8 (1.1)             | 1 (1.8)           | 3 (2.8)                | 0                |
| Other                                           | 19 (2.6)            | 1 (1.8)           | 4 (3.8)                | 0                |
| Not Reported                                    | 5 (0.7)             | 0                 | 2 (1.9)                | 0                |
| Unknown                                         | 6 (0.8)             | 0                 | 1 (0.9)                | 0                |

|                                               |            |            |            |            |
|-----------------------------------------------|------------|------------|------------|------------|
| Ethnicity, n (%)                              |            |            |            |            |
| Hispanic or Latino                            | 177 (23.8) | 10 (18.2)  | 21 (19.8)  | 1 (50.0)   |
| Not Hispanic or Latino                        | 563 (75.7) | 45 (81.8)  | 84 (79.2)  | 1 (50.0)   |
| Not Reported                                  | 2 (0.3)    | 0          | 0          | 0          |
| Unknown                                       | 2 (0.3)    | 0          | 1 (0.9)    | 0          |
| Race and Ethnicity Group, n (%) <sup>ll</sup> |            |            |            |            |
| Minority                                      | 220 (29.6) | 14 (25.5)  | 27 (25.5)  | 1 (50.0)   |
| Non-minority                                  | 524 (70.4) | 41 (74.5)  | 79 (74.5)  | 1 (50.0)   |
| Race and Ethnicity Group, n (%) <sup>**</sup> |            |            |            |            |
| White                                         | 488 (65.6) | 39 (70.9)  | 72 (67.9)  | 1 (50.0)   |
| Communities of Color                          | 256 (34.4) | 16 (29.1)  | 34 (32.1)  | 1 (50.0)   |
| Body Mass Index (kg/m <sup>2</sup> )          |            |            |            |            |
| n                                             | 741        | 55         | 105        | 2          |
| Mean (SD)                                     | 30.5 (7.0) | 31.8 (6.9) | 32.0 (7.2) | 31.9 (3.1) |

\*With the censoring rules for efficacy analyses. Covid-19 case based on eligible symptoms and positive RT-PCR within 14 days. If a participant had a positive RT-PCR at pre-dose 2 visit (day 29) without eligible symptoms with 14 days, or positive Elecsys at scheduled visits prior to becoming a Covid-19 case, the participants was censored at the date with positive RT-PCR or Elecsys. Percentages are based on the number of participants in per-protocol set with Covid-19 based on adjudication committee assessments starting 14 days after second injection. †Based on stratification factor from IRT, participants <65 years old were categorized as at risk for severe Covid-19 illness if they have at least 1 of the risk factors specified in the study protocol at screening. ‡ Participants could be under one or more categories and are counted once at each category. §Age and health risk for severe Covid-19 were derived from age and risk factors collected on case report forms. ¶Baseline SARS-CoV-2 Status defined as positive if there was immunologic or virologic evidence of prior Covid-19 (positive RT-PCR test or positive Elecsys result at day 1) and negative defined as negative RT-PCR test and negative Elecsys result at day 1. ||Minority defined as Blacks or African Americans, Hispanics or Latinos, American Indians or Alaska Natives, Native Hawaiians, and other Pacific Islanders, and Non-Minority includes all the others whose race or ethnicity is not unknown, unreported or missing. \*\*White defined as White and non-Hispanic, and Communities of Color includes all the others whose race or ethnicity is not unknown, unreported or missing. Data-cutoff date: March 26, 2021.

**Table S33. Exploratory Analysis in Participants with One Injection 14 days First Injection, mITT**

|                                                                                                                                                                                                                                                                                                                                                                                                                                                                                                                                                                                                                                                                                                                                                                                                                                                                                                                                                                                                                                                                                                                                                                                                                                                                    | <b>Placebo<br/>N=425</b> | <b>mRNA-1273<br/>N=334</b> |
|--------------------------------------------------------------------------------------------------------------------------------------------------------------------------------------------------------------------------------------------------------------------------------------------------------------------------------------------------------------------------------------------------------------------------------------------------------------------------------------------------------------------------------------------------------------------------------------------------------------------------------------------------------------------------------------------------------------------------------------------------------------------------------------------------------------------------------------------------------------------------------------------------------------------------------------------------------------------------------------------------------------------------------------------------------------------------------------------------------------------------------------------------------------------------------------------------------------------------------------------------------------------|--------------------------|----------------------------|
| <b>Covid-19 cases</b>                                                                                                                                                                                                                                                                                                                                                                                                                                                                                                                                                                                                                                                                                                                                                                                                                                                                                                                                                                                                                                                                                                                                                                                                                                              |                          |                            |
| Covid-19*, adjudicated cases n (%)                                                                                                                                                                                                                                                                                                                                                                                                                                                                                                                                                                                                                                                                                                                                                                                                                                                                                                                                                                                                                                                                                                                                                                                                                                 | 45 (10.6)                | 4 (1.2)                    |
| Incidence rate per 1000 person-year (95% CI)                                                                                                                                                                                                                                                                                                                                                                                                                                                                                                                                                                                                                                                                                                                                                                                                                                                                                                                                                                                                                                                                                                                                                                                                                       | 471.1 (343.6-630.4)      | 49.6 (13.5-127.1)          |
| Severe Covid-19 n (%)                                                                                                                                                                                                                                                                                                                                                                                                                                                                                                                                                                                                                                                                                                                                                                                                                                                                                                                                                                                                                                                                                                                                                                                                                                              | 6 (1.4)                  | 1 (0.3)                    |
| Incidence rate per 1000 person-year (95% CI)                                                                                                                                                                                                                                                                                                                                                                                                                                                                                                                                                                                                                                                                                                                                                                                                                                                                                                                                                                                                                                                                                                                                                                                                                       | 54.4 (19.9-118.4)        | 12.0 (0.3-67.0)            |
| <p>*With the censoring rules for efficacy analyses. Covid-19 case based on eligible symptoms and positive RT-PCR within 14 days. If a participant had a positive RT-PCR at pre-dose 2 visit (day 29) without eligible symptoms with 14 days, or positive Elecsys at scheduled visits prior to becoming a Covid-19 case, the participant was censored at the date of positive RT-PCR or Elecsys. Vaccine efficacy (VE), defined as 1 - hazard ratio (mRNA-1273 vs. placebo), and 95% CI are estimated using a stratified Cox proportional hazard model with Efron's method of tie handling and with the treatment group as a covariate, adjusting for stratification factor. Person-years defined as the total years from randomization date to the date of Covid-19, the date of earliest positive RT-PCR or Elecsys at scheduled visits, last date of study participation, or efficacy data cutoff date, whichever is earlier. Incidence rate defined as the number of participants with an event divided by the number of subjects at risk and adjusted by person-years (total time at risk) in each treatment group. The 95% CI is calculated using the exact method (Poisson distribution) and adjusted by person-years. Data-cutoff date: March 26, 2021.</p> |                          |                            |
