# Supplementary material
Source: PubMed Central journal article supplement (PMC8482810)
Supplement: NEJMoa2113017_disclosures.pdf [file NEJMoa2113017_disclosures.pdf]

Disclosure Purpose: 21-13017

## Summary of Interests

### Company or Organization

| Entity                                                                                                                                      | Type                       | Interest Held By                                                                |
|---------------------------------------------------------------------------------------------------------------------------------------------|----------------------------|---------------------------------------------------------------------------------|
| <a href="#">GlaxoSmithKline, LLC.</a>                                                                                                       | Grant / Contract           | Self                                                                            |
| <i>Recipient Name:</i> Emory University<br><i>Grant / Contract Description:</i><br><i>Additional Information:</i>                           |                            | <i>Recipient Type:</i> Institution<br><i>Grant / Contract Purpose:</i> Research |
| <a href="#">Janssen Global Services, LLC</a>                                                                                                | Grant / Contract           | Self                                                                            |
| <i>Recipient Name:</i> Emory University<br><i>Grant / Contract Description:</i> Clinical research<br><i>Additional Information:</i>         |                            | <i>Recipient Type:</i> Institution<br><i>Grant / Contract Purpose:</i> Research |
| <a href="#">Janssen Global Services, LLC</a>                                                                                                | Consultant                 | Self                                                                            |
| <i>Category:</i> Consultant<br><i>Additional Information:</i>                                                                               |                            | <i>Description:</i>                                                             |
| <a href="#">Kentucky Bioprocessing, Inc</a>                                                                                                 | Data And Safety Monitoring | Self                                                                            |
| <i>Category:</i> Data And Safety Monitoring<br><i>Additional Information:</i>                                                               |                            | <i>Description:</i>                                                             |
| <a href="#">MedImmune, LLC</a>                                                                                                              | Grant / Contract           | Self                                                                            |
| <i>Recipient Name:</i> Emory University<br><i>Grant / Contract Description:</i> Clinical trials<br><i>Additional Information:</i>           |                            | <i>Recipient Type:</i> Institution<br><i>Grant / Contract Purpose:</i> Research |
| <a href="#">Medscape</a>                                                                                                                    | Consultant                 | Self                                                                            |
| <i>Category:</i> Consultant<br><i>Additional Information:</i>                                                                               |                            | <i>Description:</i>                                                             |
| <a href="#">Merck</a>                                                                                                                       | Grant / Contract           | Self                                                                            |
| <i>Recipient Name:</i> Emory University<br><i>Grant / Contract Description:</i> Clinical trials research<br><i>Additional Information:</i>  |                            | <i>Recipient Type:</i> Institution<br><i>Grant / Contract Purpose:</i> Research |
| <a href="#">Micron Technology</a>                                                                                                           | Grant / Contract           | Self                                                                            |
| <i>Recipient Name:</i> Emory University<br><i>Grant / Contract Description:</i> Clinical Trials research<br><i>Additional Information:</i>  |                            | <i>Recipient Type:</i> Institution<br><i>Grant / Contract Purpose:</i> Research |
| <a href="#">PaxVax</a>                                                                                                                      | Grant / Contract           | Self                                                                            |
| <i>Recipient Name:</i> Emory University<br><i>Grant / Contract Description:</i> Clinical trials research<br><i>Additional Information:</i>  |                            | <i>Recipient Type:</i> Institution<br><i>Grant / Contract Purpose:</i> Research |
| <a href="#">PFIZER CANADA INC</a>                                                                                                           | Grant / Contract           | Self                                                                            |
| <i>Recipient Name:</i> Emory University<br><i>Grant / Contract Description:</i> Clinical research studies<br><i>Additional Information:</i> |                            | <i>Recipient Type:</i> Institution<br><i>Grant / Contract Purpose:</i> Research |
| <a href="#">PFIZER CANADA INC</a>                                                                                                           | Consultant                 | Self                                                                            |
| <i>Category:</i> Consultant<br><i>Additional Information:</i>                                                                               |                            | <i>Description:</i>                                                             |
| <a href="#">Regeneron Pharmaceuticals, Inc.</a>                                                                                             | Grant / Contract           | Self                                                                            |
| <i>Recipient Name:</i> Emory University<br><i>Grant / Contract Description:</i> Clinical trials research<br><i>Additional Information:</i>  |                            | <i>Recipient Type:</i> Institution<br><i>Grant / Contract Purpose:</i> Research |

|                                                                                                                                               |                            |                                                                                 |
|-----------------------------------------------------------------------------------------------------------------------------------------------|----------------------------|---------------------------------------------------------------------------------|
| <b>SANOPI PASTEUR INC.</b>                                                                                                                    | Grant / Contract           | Self                                                                            |
| <i>Recipient Name:</i> Emory University<br><i>Grant / Contract Description:</i> Clinical trial-related work<br><i>Additional Information:</i> |                            | <i>Recipient Type:</i> Institution<br><i>Grant / Contract Purpose:</i> Research |
| <b>SANOPI PASTEUR INC.</b>                                                                                                                    | End Point Review Committee | Self                                                                            |
| <i>Category:</i> End Point Review Committee<br><i>Additional Information:</i>                                                                 |                            | <i>Description:</i>                                                             |
| <b>SANOPI PASTEUR INC.</b>                                                                                                                    | Data And Safety Monitoring | Self                                                                            |
| <i>Category:</i> Data And Safety Monitoring<br><i>Additional Information:</i>                                                                 |                            | <i>Description:</i>                                                             |
| <b>SANOPI PASTEUR INC.</b>                                                                                                                    | Consultant                 | Self                                                                            |
| <i>Category:</i> Consultant<br><i>Additional Information:</i>                                                                                 |                            | <i>Description:</i>                                                             |

**Additional Questions:**

- Are there other relationships or activities that readers could perceive to have influenced, or that give the appearance of potentially influencing, what you wrote in the submitted work?**  
No.
- What is the manuscript title?**  
Phase 3 Trial of mRNA-1273 SARS-CoV-2 Vaccine: Completion of Blinded Phase
- Are you the corresponding author?**  
No.

**Certification**

I certify that the information provided in this disclosure is complete and accurate.

Disclosure Purpose: 21-13017

Summary of Interests

**Company or Organization**

| Entity                                                                               | Type         | Interest Held By             |
|--------------------------------------------------------------------------------------|--------------|------------------------------|
| Moderna                                                                              | Employment   | Self                         |
| <i>Title:</i> Vice President, Clinical Development<br><i>Additional Information:</i> |              | <i>Position Description:</i> |
| Moderna                                                                              | Stock Option | Self                         |
| <i>Additional Information:</i>                                                       |              |                              |

Additional Questions:

- Are there other relationships or activities that readers could perceive to have influenced, or that give the appearance of potentially influencing, what you wrote in the submitted work?**  
No.
- What is the manuscript title?**  
Phase 3 Trial of mRNA-1273 SARS-CoV-2 Vaccine: Completion of Blinded Phase
- Are you the corresponding author?**  
No.

Certification

I certify that the information provided in this disclosure is complete and accurate.

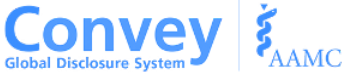

Disclosure Purpose: 21-13017

## Summary of Interests

### Company or Organization

| Entity                                                                                                                                                                              | Type             | Interest Held By                                                                |
|-------------------------------------------------------------------------------------------------------------------------------------------------------------------------------------|------------------|---------------------------------------------------------------------------------|
| <b>Bill and Melinda Gates Foundation</b>                                                                                                                                            | Grant / Contract | Self                                                                            |
| <i>Recipient Name:</i> Lindsey Baden<br><i>Grant / Contract Description:</i> Vaccine and mAb development for Infectious Diseases<br><i>Additional Information:</i>                  |                  | <i>Recipient Type:</i> Institution<br><i>Grant / Contract Purpose:</i> Research |
| <b>Harvard Medical School</b>                                                                                                                                                       | Grant / Contract | Self                                                                            |
| <i>Recipient Name:</i> Lindsey Baden<br><i>Grant / Contract Description:</i> Support clinical research, Covid response<br><i>Additional Information:</i>                            |                  | <i>Recipient Type:</i> Institution<br><i>Grant / Contract Purpose:</i> Research |
| <b>National Institutes of Health</b>                                                                                                                                                | Grant / Contract | Self                                                                            |
| <i>Recipient Name:</i> Lindsey Baden<br><i>Grant / Contract Description:</i> NIAID, NCATS. Support multiple activities: vaccine development, CTSA<br><i>Additional Information:</i> |                  | <i>Recipient Type:</i> Institution<br><i>Grant / Contract Purpose:</i> Research |
| <b>Wellcome Trust</b>                                                                                                                                                               | Grant / Contract | Self                                                                            |
| <i>Recipient Name:</i> Lindsey Baden<br><i>Grant / Contract Description:</i> Develop Cholera Vaccine<br><i>Additional Information:</i>                                              |                  | <i>Recipient Type:</i> Institution<br><i>Grant / Contract Purpose:</i> Research |

## Additional Questions:

1. **Are there other relationships or activities that readers could perceive to have influenced, or that give the appearance of potentially influencing, what you wrote in the submitted work?**

Yes.

- a. **Please describe those relationships.**

Dr. Baden reports grants from NIH/NIAID for the conduct of this study; in addition grants from NIH/ NIAID, Gates Foundation, and Wellcome Trust, outside the submitted work; and Dr. Baden is a Deputy Editor at the New England Journal of Medicine. Dr. Baden is involved in HIV, other pathogens, and COVID vaccine clinical trials conducted in collaboration with the NIH, HIV Vaccine Trials Network (HVTN), COVID Vaccine Prevention Network (CoVPN), International AIDS Vaccine Initiative (IAVI), Crucell/ Janssen, Moderna, Military HIV Research Program (MHRP), Gates Foundation, and the Ragon Institute.

2. **What is the manuscript title?**

Phase 3 Trial of mRNA-1273 SARS-CoV-2 Vaccine: Completion of Blinded Phase

3. **Are you the corresponding author?**

Yes.

- a. **Please list the other authors' names here.**

Hana M. El Sahly, M.D.,1\* Lindsey R. Baden, M.D.,2\* Brandon Essink, M.D.,3 Susanne Doblecki-Lewis, M.D.,4 Judith M. Martin, M.D.,5 Evan J. Anderson, M.D.,6 Thomas B. Campbell, M.D.,7 Jesse Clark, M.D.,8 Lisa A. Jackson, M.D.,9 Carl J. Fichtenbaum, M.D.,10 Marcus Zervos, M.D.,11 Bruce Rankin, D.O.,12 Frank Eder, M.D.,3 Gregory Feldman, M.D.,13 Christina Kennelly, M.D.,14 Laurie Han-Conrad, M.D.,15 Michael Levin, M.D.,16 Kathleen M. Neuzil, M.D.,17 Lawrence Corey, M.D.,18 Peter Gilbert, Ph.D.,18 Holly Janes, Ph.D.,18 Dean Follmann, Ph.D.,19 Mary Marovich, M.D.,19 Laura Polakowski, M.D.,19 John R. Mascola, M.D.,20 Julie E. Ledgerwood, D.O.,20 Barney S. Graham, M.D.,20 Allison August, M.D.,21 Heather Clouting, MSc.,21 Weiping Deng, Ph.D.,21 Shu Han, PhD,21 Brett Leav, M.D.,21 Deb Manzo, MSc.,21 Rolando Pajon, Ph.D.,21 Florian Schödel, M.D.,PhD,21 Joanne E. Tomassini, Ph.D.,21 Honghong Zhou, Ph.D.,21 Jacqueline Miller, M.D.,21 on behalf of the COVE Study Group

## Certification

I certify that the information provided in this disclosure is complete and accurate.

**Disclosure Purpose:** 21-13017

### Summary of Interests

I do not have any interests to disclose at this time.

### Additional Questions:

- Are there other relationships or activities that readers could perceive to have influenced, or that give the appearance of potentially influencing, what you wrote in the submitted work?**  
No.
- What is the manuscript title?**  
Phase 3 Trial of mRNA-1273 SARS-CoV-2 Vaccine: Completion of Blinded Phase
- Are you the corresponding author?**  
No.

### Certification

I certify that the information provided in this disclosure is complete and accurate.

**Disclosure Purpose:** 21-13017

**Summary of Interests**

I do not have any interests to disclose at this time.

**Additional Questions:**

- 1. **Are there other relationships or activities that readers could perceive to have influenced, or that give the appearance of potentially influencing, what you wrote in the submitted work?**  
No.
- 2. **What is the manuscript title?**  
Phase 3 Trial of mRNA-1273 SARS-CoV-2 Vaccine: Completion of Blinded Phase
- 3. **Are you the corresponding author?**  
No.

**Certification**

I certify that the information provided in this disclosure is complete and accurate.

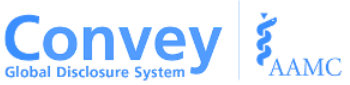

**Disclosure Purpose:** 21-13017

## Summary of Interests

| Company or Organization                                       |            |                                              |
|---------------------------------------------------------------|------------|----------------------------------------------|
| Entity                                                        | Type       | Interest Held By                             |
| <a href="#">Moderna, Inc.</a>                                 | Consultant | Self                                         |
| <i>Category:</i> Consultant<br><i>Additional Information:</i> |            | <i>Description:</i> Clinical Operations Lead |

## Additional Questions:

- Are there other relationships or activities that readers could perceive to have influenced, or that give the appearance of potentially influencing, what you wrote in the submitted work?**  
No.
- What is the manuscript title?**  
Phase 3 Trial of mRNA-1273 SARS-CoV-2 Vaccine: Completion of Blinded Phase
- Are you the corresponding author?**  
No.

## Certification

I certify that the information provided in this disclosure is complete and accurate.

**Disclosure Purpose:** 21-13017

## Summary of Interests

| Company or Organization                                                                                         |                  |                                                                                 |
|-----------------------------------------------------------------------------------------------------------------|------------------|---------------------------------------------------------------------------------|
| Entity                                                                                                          | Type             | Interest Held By                                                                |
| National Institutes of Health                                                                                   | Grant / Contract | Self                                                                            |
| <i>Recipient Name:</i> Lawrence Corey<br><i>Grant / Contract Description:</i><br><i>Additional Information:</i> |                  | <i>Recipient Type:</i> Institution<br><i>Grant / Contract Purpose:</i> Research |

## Additional Questions:

- Are there other relationships or activities that readers could perceive to have influenced, or that give the appearance of potentially influencing, what you wrote in the submitted work?**  
No.
- What is the manuscript title?**  
Phase 3 Trial of mRNA-1273 SARS-CoV-2 Vaccine: Completion of Blinded Phase
- Are you the corresponding author?**  
No.

## Certification

I certify that the information provided in this disclosure is complete and accurate.

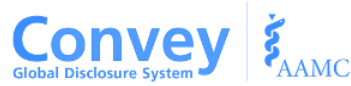



Disclosure Purpose: 21-13017

## Summary of Interests

### Company or Organization

| Entity                                                                                               | Type       | Interest Held By                                                                                                                                                                                                                                                                     |
|------------------------------------------------------------------------------------------------------|------------|--------------------------------------------------------------------------------------------------------------------------------------------------------------------------------------------------------------------------------------------------------------------------------------|
| Moderna                                                                                              | Employment | Self                                                                                                                                                                                                                                                                                 |
| <i>Title:</i> Director, Biostatistics                                                                |            | <i>Position Description:</i> Provide statistical support for clinical trial designs and protocol development, author statistical analysis plans, oversee dataset derivations, statistical analyses and reporting, ensure data quality in the clinical study reports and manuscripts. |
| <i>Additional Information:</i> Full time employee. Restricted stock units and stock options granted. |            |                                                                                                                                                                                                                                                                                      |

## Additional Questions:

- Are there other relationships or activities that readers could perceive to have influenced, or that give the appearance of potentially influencing, what you wrote in the submitted work?**  
No.
- What is the manuscript title?**  
Phase 3 Trial of mRNA-1273 SARS-CoV-2 Vaccine: Completion of Blinded Phase
- Are you the corresponding author?**  
No.

## Certification

I certify that the information provided in this disclosure is complete and accurate.

**Disclosure Purpose:** 21-13017

### Summary of Interests

I do not have any interests to disclose at this time.

### Additional Questions:

- Are there other relationships or activities that readers could perceive to have influenced, or that give the appearance of potentially influencing, what you wrote in the submitted work?**  
No.
- What is the manuscript title?**  
Phase 3 Trial of mRNA-1273 SARS-CoV-2 Vaccine: Completion of Blinded Phase
- Are you the corresponding author?**  
No.

### Certification

I certify that the information provided in this disclosure is complete and accurate.

**Disclosure Purpose:** 21-13017

**Summary of Interests**

I do not have any interests to disclose at this time.

**Additional Questions:**

- 1. **Are there other relationships or activities that readers could perceive to have influenced, or that give the appearance of potentially influencing, what you wrote in the submitted work?**  
No.
- 2. **What is the manuscript title?**  
Re: Phase 3 Trial of mRNA-1273 SARS-CoV-2 Vaccine: Completion of Blinded Phase
- 3. **Are you the corresponding author?**  
No.

**Certification**

I certify that the information provided in this disclosure is complete and accurate.



**Disclosure Purpose:** 21-13017

## Summary of Interests

**Company or Organization**

| Entity                                        | Type             | Interest Held By                 |
|-----------------------------------------------|------------------|----------------------------------|
| <a href="#">National Institutes of Health</a> | Grant / Contract | Other - Grant to the Institution |

*Recipient Name:* Baylor college of Medicine  
*Grant / Contract Description:* VTEU Grant- UM1 AI48575-02S2  
*Additional Information:*

*Recipient Type:* Institution  
*Grant / Contract Purpose:* Research

## Additional Questions:

- Are there other relationships or activities that readers could perceive to have influenced, or that give the appearance of potentially influencing, what you wrote in the submitted work?**  
Yes.
  - Please describe those relationships.**  
Dr. El Sahly reports grants from The National Institutes of Health, during the conduct of the study, 3UM1AI148575-01S2
- What is the manuscript title?**  
Phase 3 trial of mRNA-1273 SARS-CoV-2 vaccine: completion of blinded phase
- Are you the corresponding author?**  
No.

## Certification

I certify that the information provided in this disclosure is complete and accurate.

**Disclosure Purpose:** 21-13017

**Summary of Interests**

I do not have any interests to disclose at this time.

**Additional Questions:**

- 1. **Are there other relationships or activities that readers could perceive to have influenced, or that give the appearance of potentially influencing, what you wrote in the submitted work?**  
No.
- 2. **What is the manuscript title?**  
Phase 3 Trial of mRNA-1273 SARS-CoV-2 Vaccine: Completion of Blinded Phase
- 3. **Are you the corresponding author?**  
No.

**Certification**

I certify that the information provided in this disclosure is complete and accurate.



**Disclosure Purpose:** 21-13017

## Summary of Interests

| Company or Organization                                                |            |                                                     |
|------------------------------------------------------------------------|------------|-----------------------------------------------------|
| Entity                                                                 | Type       | Interest Held By                                    |
| <a href="#">GlaxoSmithKline</a>                                        | Consultant | Self                                                |
| <i>Category:</i> Consultant<br><i>Additional Information:</i> 10 hr    |            | <i>Description:</i> Pharmaceutical talks            |
| <a href="#">Mylan Inc.</a>                                             | Consultant | Self                                                |
| <i>Category:</i> Consultant<br><i>Additional Information:</i> 12 hours |            | <i>Description:</i> Pharmaceutical consulting board |

## Additional Questions:

- Are there other relationships or activities that readers could perceive to have influenced, or that give the appearance of potentially influencing, what you wrote in the submitted work?**  
No.
- What is the manuscript title?**  
Phase 3 Trial of mRNA-1273 SARS-CoV-2 Vaccine: Completion of Blinded Phase
- Are you the corresponding author?**  
No.

## Certification

I certify that the information provided in this disclosure is complete and accurate.

Disclosure Purpose: 21-13017

## Summary of Interests

### Company or Organization

| Entity                                                                                                                                                          | Type             | Interest Held By                                                                |
|-----------------------------------------------------------------------------------------------------------------------------------------------------------------|------------------|---------------------------------------------------------------------------------|
| <a href="#">Amgen Inc.</a>                                                                                                                                      | Grant / Contract | Self                                                                            |
| <i>Recipient Name:</i> Carl Fichtenbaum<br><i>Grant / Contract Description:</i> Research study on lipid-lowering agent in HIV<br><i>Additional Information:</i> |                  | <i>Recipient Type:</i> Institution<br><i>Grant / Contract Purpose:</i> Research |
| <a href="#">Gilead Sciences Inc</a>                                                                                                                             | Grant / Contract | Self                                                                            |
| <i>Recipient Name:</i> Carl Fichtenbaum<br><i>Grant / Contract Description:</i> Multiple research studies<br><i>Additional Information:</i>                     |                  | <i>Recipient Type:</i> Institution<br><i>Grant / Contract Purpose:</i> Research |
| <a href="#">Merck</a>                                                                                                                                           | Grant / Contract | Self                                                                            |
| <i>Recipient Name:</i> Carl Fichtenbaum<br><i>Grant / Contract Description:</i> Research studies in HIV<br><i>Additional Information:</i>                       |                  | <i>Recipient Type:</i> Institution<br><i>Grant / Contract Purpose:</i> Research |
| <a href="#">ViiV Healthcare Company</a>                                                                                                                         | Grant / Contract | Self                                                                            |
| <i>Recipient Name:</i> Carl Fichtenbaum<br><i>Grant / Contract Description:</i> Multiple research studies in HIV<br><i>Additional Information:</i>              |                  | <i>Recipient Type:</i> Institution<br><i>Grant / Contract Purpose:</i> Research |

### Additional Questions:

- Are there other relationships or activities that readers could perceive to have influenced, or that give the appearance of potentially influencing, what you wrote in the submitted work?**  
No.
- What is the manuscript title?**  
Phase 3 Trial of mRNA-1273 SARS-CoV-2 Vaccine: Completion of Blinded Phase
- Are you the corresponding author?**  
No.

### Certification

I certify that the information provided in this disclosure is complete and accurate.

**Disclosure Purpose:** 21-13017

Summary of Interests

I do not have any interests to disclose at this time.

Additional Questions:

- 1. **Are there other relationships or activities that readers could perceive to have influenced, or that give the appearance of potentially influencing, what you wrote in the submitted work?**  
No.
- 2. **What is the manuscript title?**  
Phase 3 Trial of mRNA-1273 SARS-CoV-2 Vaccine: Completion of Blinded Phase
- 3. **Are you the corresponding author?**  
No.

Certification

I certify that the information provided in this disclosure is complete and accurate.





**Disclosure Purpose:** 21-13017

**Summary of Interests**

I do not have any interests to disclose at this time.

**Additional Questions:**

- 1. **Are there other relationships or activities that readers could perceive to have influenced, or that give the appearance of potentially influencing, what you wrote in the submitted work?**  
No.
- 2. **What is the manuscript title?**  
Phase 3 Trial of mRNA-1273 SARS-CoV-2 Vaccine: Completion of Blinded Phase
- 3. **Are you the corresponding author?**  
No.

**Certification**

I certify that the information provided in this disclosure is complete and accurate.



Disclosure Purpose: 21-13017

## Summary of Interests

### Intellectual Property

| Type                                                                                                                                                                                                                                                                                                                                                                                                                                                                                                                                                                                                                                                                              | Is Licensed                                        | Interest Held By                                                                                                                                      |       |      |                                 |                                                    |        |                     |                                                    |        |             |                                                    |        |                                                                                                                                                                                                                                                                                                                                                                              |
|-----------------------------------------------------------------------------------------------------------------------------------------------------------------------------------------------------------------------------------------------------------------------------------------------------------------------------------------------------------------------------------------------------------------------------------------------------------------------------------------------------------------------------------------------------------------------------------------------------------------------------------------------------------------------------------|----------------------------------------------------|-------------------------------------------------------------------------------------------------------------------------------------------------------|-------|------|---------------------------------|----------------------------------------------------|--------|---------------------|----------------------------------------------------|--------|-------------|----------------------------------------------------|--------|------------------------------------------------------------------------------------------------------------------------------------------------------------------------------------------------------------------------------------------------------------------------------------------------------------------------------------------------------------------------------|
| <b>Patent - Prefusion coronavirus spike proteins and their u</b>                                                                                                                                                                                                                                                                                                                                                                                                                                                                                                                                                                                                                  | No                                                 | Self                                                                                                                                                  |       |      |                                 |                                                    |        |                     |                                                    |        |             |                                                    |        |                                                                                                                                                                                                                                                                                                                                                                              |
| <i>Description:</i> Prefusion coronavirus spike proteins and their use<br><i>Patent Status:</i> Pending<br><i>Filing Jurisdiction:</i> EU<br><i>Licensees:</i>                                                                                                                                                                                                                                                                                                                                                                                                                                                                                                                    |                                                    | <i>Patent Number:</i> Europe Patent Application No. 17800655.7<br><i>Patent Holder:</i> Current Institution<br><br><i>Additional Information:</i>     |       |      |                                 |                                                    |        |                     |                                                    |        |             |                                                    |        |                                                                                                                                                                                                                                                                                                                                                                              |
| <b>Patent - Prefusion coronavirus spike proteins and their u</b>                                                                                                                                                                                                                                                                                                                                                                                                                                                                                                                                                                                                                  | Yes                                                | Self                                                                                                                                                  |       |      |                                 |                                                    |        |                     |                                                    |        |             |                                                    |        |                                                                                                                                                                                                                                                                                                                                                                              |
| <i>Description:</i> Prefusion coronavirus spike proteins and their use<br><i>Patent Status:</i> Issued<br><i>Filing Jurisdiction:</i> USA<br><i>Licensees:</i> <table border="1" data-bbox="45 766 792 913"> <thead> <tr> <th>Licensee</th> <th>Title</th> <th>Date</th> </tr> </thead> <tbody> <tr> <td>Medigen Vaccine Biologics Corp.</td> <td>Prefusion coronavirus spike proteins and their use</td> <td>9/1/20</td> </tr> <tr> <td>SANOFI PASTEUR INC.</td> <td>Prefusion coronavirus spike proteins and their use</td> <td>9/1/20</td> </tr> <tr> <td>BioNTech AG</td> <td>Prefusion coronavirus spike proteins and their use</td> <td>9/1/20</td> </tr> </tbody> </table> |                                                    | Licensee                                                                                                                                              | Title | Date | Medigen Vaccine Biologics Corp. | Prefusion coronavirus spike proteins and their use | 9/1/20 | SANOFI PASTEUR INC. | Prefusion coronavirus spike proteins and their use | 9/1/20 | BioNTech AG | Prefusion coronavirus spike proteins and their use | 9/1/20 | <i>Patent Number:</i> US Patent No. 10,960,070<br><i>Patent Holder:</i> Current Institution<br><br><i>Additional Information:</i> This is a U.S. government patent on which I am the first named inventor. I will receive capped royalties according to NIH policy. All licenses are non-exclusive, and I have listed 3 licensees but there are others under confidentiality |
| Licensee                                                                                                                                                                                                                                                                                                                                                                                                                                                                                                                                                                                                                                                                          | Title                                              | Date                                                                                                                                                  |       |      |                                 |                                                    |        |                     |                                                    |        |             |                                                    |        |                                                                                                                                                                                                                                                                                                                                                                              |
| Medigen Vaccine Biologics Corp.                                                                                                                                                                                                                                                                                                                                                                                                                                                                                                                                                                                                                                                   | Prefusion coronavirus spike proteins and their use | 9/1/20                                                                                                                                                |       |      |                                 |                                                    |        |                     |                                                    |        |             |                                                    |        |                                                                                                                                                                                                                                                                                                                                                                              |
| SANOFI PASTEUR INC.                                                                                                                                                                                                                                                                                                                                                                                                                                                                                                                                                                                                                                                               | Prefusion coronavirus spike proteins and their use | 9/1/20                                                                                                                                                |       |      |                                 |                                                    |        |                     |                                                    |        |             |                                                    |        |                                                                                                                                                                                                                                                                                                                                                                              |
| BioNTech AG                                                                                                                                                                                                                                                                                                                                                                                                                                                                                                                                                                                                                                                                       | Prefusion coronavirus spike proteins and their use | 9/1/20                                                                                                                                                |       |      |                                 |                                                    |        |                     |                                                    |        |             |                                                    |        |                                                                                                                                                                                                                                                                                                                                                                              |
| <b>Patent - SARS-CoV-2 Vaccine</b>                                                                                                                                                                                                                                                                                                                                                                                                                                                                                                                                                                                                                                                | No                                                 | Self                                                                                                                                                  |       |      |                                 |                                                    |        |                     |                                                    |        |             |                                                    |        |                                                                                                                                                                                                                                                                                                                                                                              |
| <i>Description:</i> SARS-CoV-2 Vaccine<br><i>Patent Status:</i> Provisional<br><i>Filing Jurisdiction:</i> USA<br><i>Licensees:</i>                                                                                                                                                                                                                                                                                                                                                                                                                                                                                                                                               |                                                    | <i>Patent Number:</i> PCT Patent Application No. PCT/US2021/017709<br><i>Patent Holder:</i> Current Institution<br><br><i>Additional Information:</i> |       |      |                                 |                                                    |        |                     |                                                    |        |             |                                                    |        |                                                                                                                                                                                                                                                                                                                                                                              |

### Additional Questions:

- Are there other relationships or activities that readers could perceive to have influenced, or that give the appearance of potentially influencing, what you wrote in the submitted work?**  
No.
- What is the manuscript title?**  
Infection and vaccine-induced neutralizing antibody responses to the SARS-CoV-2 B.1.617 variants
- Are you the corresponding author?**  
No.

### Certification

I certify that the information provided in this disclosure is complete and accurate.

**Disclosure Purpose:** 21-13017

**Summary of Interests**

I do not have any interests to disclose at this time.

**Additional Questions:**

- 1. **Are there other relationships or activities that readers could perceive to have influenced, or that give the appearance of potentially influencing, what you wrote in the submitted work?**  
No.
- 2. **What is the manuscript title?**  
Phase 3 Trial of mRNA-1273 SARS-CoV-2 Vaccine: Completion of Blinded Phase
- 3. **Are you the corresponding author?**  
No.

**Certification**

I certify that the information provided in this disclosure is complete and accurate.



**Disclosure Purpose:** 21-13017

**Summary of Interests**

I do not have any interests to disclose at this time.

**Additional Questions:**

- 1. **Are there other relationships or activities that readers could perceive to have influenced, or that give the appearance of potentially influencing, what you wrote in the submitted work?**  
No.
- 2. **What is the manuscript title?**  
Phase 3 Trial of mRNA-1273 SARS-CoV-2 Vaccine: Completion of Blinded Phase
- 3. **Are you the corresponding author?**  
No.

**Certification**

I certify that the information provided in this disclosure is complete and accurate.

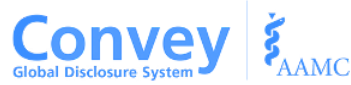

Disclosure Purpose: 21-13017

Summary of Interests

**Company or Organization**

| Entity                                                                                  | Type             | Interest Held By                          |
|-----------------------------------------------------------------------------------------|------------------|-------------------------------------------|
| National Institutes of Health                                                           | Grant / Contract | Self                                      |
| <i>Recipient Name:</i> Kaiser Permanente Washington                                     |                  | <i>Recipient Type:</i> Institution        |
| <i>Grant / Contract Description:</i> Funding for the conduct of a Phase 3 vaccine trial |                  | <i>Grant / Contract Purpose:</i> Research |
| <i>Additional Information:</i>                                                          |                  |                                           |

Additional Questions:

- Are there other relationships or activities that readers could perceive to have influenced, or that give the appearance of potentially influencing, what you wrote in the submitted work?**  
No.
- What is the manuscript title?**  
Phase 3 Trial of mRNA-1273 SARS-CoV-2 Vaccine: Completion of Blinded Phase
- Are you the corresponding author?**  
No.

Certification

I certify that the information provided in this disclosure is complete and accurate.

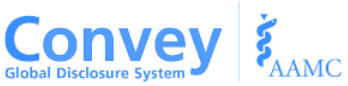

**Disclosure Purpose:** 21-13017

**Summary of Interests**

I do not have any interests to disclose at this time.

**Additional Questions:**

- 1. **Are there other relationships or activities that readers could perceive to have influenced, or that give the appearance of potentially influencing, what you wrote in the submitted work?**  
No.
- 2. **What is the manuscript title?**  
Phase 3 Safety and Efficacy of AZD1222 (ChAdOx1 nCoV-19) COVID-19 Vaccine
- 3. **Are you the corresponding author?**  
No.

**Certification**

I certify that the information provided in this disclosure is complete and accurate.



Disclosure Purpose: 21-13017

Summary of Interests

**Company or Organization**

| Entity                                                   | Type  | Interest Held By                                                  |
|----------------------------------------------------------|-------|-------------------------------------------------------------------|
| Moderna                                                  | Other | Self                                                              |
| <i>Category:</i> Other<br><i>Additional Information:</i> |       | <i>Description:</i> Received payment for PI of Moderna COVE study |

Additional Questions:

- Are there other relationships or activities that readers could perceive to have influenced, or that give the appearance of potentially influencing, what you wrote in the submitted work?**  
No.
- What is the manuscript title?**  
Phase 3 Trial of mRNA-1273 SARS-CoV-2 Vaccine: Completion of Blinded Phase
- Are you the corresponding author?**  
No.

Certification

I certify that the information provided in this disclosure is complete and accurate.

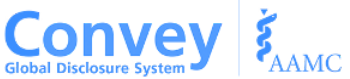

Disclosure Purpose: 21-13017

Summary of Interests

**Company or Organization**

| Entity                                                                                                                                  | Type       | Interest Held By                                                                                      |
|-----------------------------------------------------------------------------------------------------------------------------------------|------------|-------------------------------------------------------------------------------------------------------|
| Moderna                                                                                                                                 | Employment | Self                                                                                                  |
| <i>Title:</i> Vice President, COVID-19 Program Lead<br><i>Additional Information:</i> Salaried employee with stock holdings in company. |            | <i>Position Description:</i> Responsible for clinical development program for the SARS-CoV-2 vaccine. |

Additional Questions:

- Are there other relationships or activities that readers could perceive to have influenced, or that give the appearance of potentially influencing, what you wrote in the submitted work?**  
No.
- What is the manuscript title?**  
Phase 3 Trial of mRNA-1273 SARS-CoV-2 Vaccine: Completion of Blinded Phase
- Are you the corresponding author?**  
No.

Certification

I certify that the information provided in this disclosure is complete and accurate.

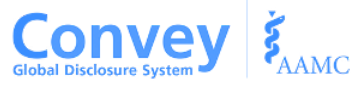



**Disclosure Purpose:** 21-13017

### Summary of Interests

I do not have any interests to disclose at this time.

### Additional Questions:

- Are there other relationships or activities that readers could perceive to have influenced, or that give the appearance of potentially influencing, what you wrote in the submitted work?**  
No.
- What is the manuscript title?**  
Phase 3 Trial of mRNA-1273 SARS-CoV-2 Vaccine: Completion of Blinded Phase
- Are you the corresponding author?**  
No.

### Certification

I certify that the information provided in this disclosure is complete and accurate.

**Disclosure Purpose:** 21-13017

**Summary of Interests**

I do not have any interests to disclose at this time.

**Additional Questions:**

- 1. **Are there other relationships or activities that readers could perceive to have influenced, or that give the appearance of potentially influencing, what you wrote in the submitted work?**  
No.
- 2. **What is the manuscript title?**  
Phase 3 Trial of mRNA-1273 SARS-CoV-2 Vaccine: Completion of Blinded Phase
- 3. **Are you the corresponding author?**  
No.

**Certification**

I certify that the information provided in this disclosure is complete and accurate.

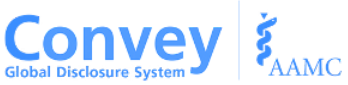

**Disclosure Purpose:** 21-13017

## Summary of Interests

**Company or Organization**

| Entity                                    | Type         | Interest Held By |
|-------------------------------------------|--------------|------------------|
| <a href="#">Moderna Therapeutics, Inc</a> | Stock Option | Self             |
| <i>Additional Information:</i>            |              |                  |

## Additional Questions:

- Are there other relationships or activities that readers could perceive to have influenced, or that give the appearance of potentially influencing, what you wrote in the submitted work?**  
No.
- What is the manuscript title?**  
Phase 3 Trial of mRNA-1273 SARS-CoV-2 Vaccine: Completion of Blinded Phase
- Are you the corresponding author?**  
No.

## Certification

I certify that the information provided in this disclosure is complete and accurate.

**Disclosure Purpose:** 21-13017

### Summary of Interests

I do not have any interests to disclose at this time.

### Additional Questions:

- Are there other relationships or activities that readers could perceive to have influenced, or that give the appearance of potentially influencing, what you wrote in the submitted work?**  
No.
- What is the manuscript title?**  
Phase 3 Trial of mRNA-1273 SARS-CoV-2 Vaccine: Completion of Blinded Phase
- Are you the corresponding author?**  
No.

### Certification

I certify that the information provided in this disclosure is complete and accurate.

Disclosure Purpose: 21-13017

Summary of Interests

**Company or Organization**

| Entity                                                        | Type       | Interest Held By                                       |
|---------------------------------------------------------------|------------|--------------------------------------------------------|
| <a href="#">Merck</a>                                         | Consultant | Self                                                   |
| <i>Category:</i> Consultant<br><i>Additional Information:</i> |            | <i>Description:</i> consultant on an unrelated project |

Additional Questions:

- Are there other relationships or activities that readers could perceive to have influenced, or that give the appearance of potentially influencing, what you wrote in the submitted work?**  
No.
- What is the manuscript title?**  
Phase 3 Trial of mRNA-1273 SARS-CoV-2 Vaccine: Completion of Blinded Phase
- Are you the corresponding author?**  
No.

Certification

I certify that the information provided in this disclosure is complete and accurate.



**Disclosure Purpose:** 21-13017

### Summary of Interests

I do not have any interests to disclose at this time.

### Additional Questions:

- Are there other relationships or activities that readers could perceive to have influenced, or that give the appearance of potentially influencing, what you wrote in the submitted work?**  
No.
- What is the manuscript title?**  
Phase 3 Trial of mRNA-1273 SARS-CoV-2 Vaccine: Completion of Blinded Phase
- Are you the corresponding author?**  
No.

### Certification

I certify that the information provided in this disclosure is complete and accurate.

**Disclosure Purpose:** 21-13017

## Summary of Interests

| Company or Organization                                  |              |                                                                                                               |
|----------------------------------------------------------|--------------|---------------------------------------------------------------------------------------------------------------|
| Entity                                                   | Type         | Interest Held By                                                                                              |
| Moderna                                                  | Employment   | Self                                                                                                          |
| <i>Title:</i> Therapeutic Area Head, Infectious Diseases |              | <i>Position Description:</i> Head of development activities for vaccines and monoclonal antibodies at Moderna |
| <i>Additional Information:</i>                           |              |                                                                                                               |
| Moderna                                                  | Stock        | Self                                                                                                          |
| <i>Additional Information:</i>                           |              |                                                                                                               |
| Moderna                                                  | Stock Option | Self                                                                                                          |
| <i>Additional Information:</i>                           |              |                                                                                                               |

## Additional Questions:

- Are there other relationships or activities that readers could perceive to have influenced, or that give the appearance of potentially influencing, what you wrote in the submitted work?**  
No.
- What is the manuscript title?**  
Safety, Immunogenicity and Efficacy of mRNA-1273 SARS-CoV-2 Vaccine in Adolescents 12 to <18 Years of Age
- Are you the corresponding author?**  
No.

## Certification

I certify that the information provided in this disclosure is complete and accurate.

**Disclosure Purpose:** 21-13017

## Summary of Interests

| Company or Organization                                                                                                                                                                                                                                              |                  |                                                                                |
|----------------------------------------------------------------------------------------------------------------------------------------------------------------------------------------------------------------------------------------------------------------------|------------------|--------------------------------------------------------------------------------|
| Entity                                                                                                                                                                                                                                                               | Type             | Interest Held By                                                               |
| Pfizer                                                                                                                                                                                                                                                               | Grant / Contract | Self                                                                           |
| <i>Recipient Name:</i> Kathleen Neuzil<br><i>Grant / Contract Description:</i> Phase I Clinical trial of mRNA vaccine candidate<br><i>Additional Information:</i> Dr. Neuzil received no salary support. Her institution received support for conduct of this trial. |                  | <i>Recipient Type:</i> Individual<br><i>Grant / Contract Purpose:</i> Research |

## Additional Questions:

- Are there other relationships or activities that readers could perceive to have influenced, or that give the appearance of potentially influencing, what you wrote in the submitted work?**  
No.
- What is the manuscript title?**  
Phase 3 Trial of mRNA-1273 SARS-CoV-2 Vaccine: Completion of Blinded Phase
- Are you the corresponding author?**  
No.

## Certification

I certify that the information provided in this disclosure is complete and accurate.



Disclosure Purpose: 21-13017

Summary of Interests

**Company or Organization**

| Entity                                                                       | Type       | Interest Held By             |
|------------------------------------------------------------------------------|------------|------------------------------|
| Moderna                                                                      | Employment | Self                         |
| <i>Title:</i> Director Clinical Biomarkers<br><i>Additional Information:</i> |            | <i>Position Description:</i> |
| Moderna                                                                      | Stock      | Self                         |
| <i>Additional Information:</i>                                               |            |                              |

Additional Questions:

- Are there other relationships or activities that readers could perceive to have influenced, or that give the appearance of potentially influencing, what you wrote in the submitted work?**  
No.
- What is the manuscript title?**  
Phase 3 Trial of mRNA-1273 SARS-CoV-2 Vaccine: Completion of Blinded Phase
- Are you the corresponding author?**  
No.

Certification

I certify that the information provided in this disclosure is complete and accurate.

**Disclosure Purpose:** 21-13017

**Summary of Interests**

I do not have any interests to disclose at this time.

**Additional Questions:**

- 1. **Are there other relationships or activities that readers could perceive to have influenced, or that give the appearance of potentially influencing, what you wrote in the submitted work?**  
No.
- 2. **What is the manuscript title?**  
Phase 3 Trial of mRNA-1273 SARS-CoV-2 Vaccine: Completion of Blinded Phase
- 3. **Are you the corresponding author?**  
No.

**Certification**

I certify that the information provided in this disclosure is complete and accurate.



**Disclosure Purpose:** 21-13017

**Summary of Interests**

I do not have any interests to disclose at this time.

**Additional Questions:**

- 1. **Are there other relationships or activities that readers could perceive to have influenced, or that give the appearance of potentially influencing, what you wrote in the submitted work?**  
No.
- 2. **What is the manuscript title?**  
Phase 3 Trial of mRNA-1273 SARS-CoV-2 Vaccine: Completion of Blinded Phase
- 3. **Are you the corresponding author?**  
No.

**Certification**

I certify that the information provided in this disclosure is complete and accurate.



**Disclosure Purpose:** 21-13017

## Summary of Interests

| Company or Organization                                       |            |                                                                     |
|---------------------------------------------------------------|------------|---------------------------------------------------------------------|
| Entity                                                        | Type       | Interest Held By                                                    |
| Moderna                                                       | Consultant | Self                                                                |
| <i>Category:</i> Consultant<br><i>Additional Information:</i> |            | <i>Description:</i> member of scientific advisory board and advisor |

## Additional Questions:

- Are there other relationships or activities that readers could perceive to have influenced, or that give the appearance of potentially influencing, what you wrote in the submitted work?**  
No.
- What is the manuscript title?**  
Phase 3 Trial of mRNA-1273 SARS-CoV-2 Vaccine: Completion of Blinded Phase
- Are you the corresponding author?**  
No.

## Certification

I certify that the information provided in this disclosure is complete and accurate.

**Disclosure Purpose:** 21-13017

**Summary of Interests**

I do not have any interests to disclose at this time.

**Additional Questions:**

- 1. **Are there other relationships or activities that readers could perceive to have influenced, or that give the appearance of potentially influencing, what you wrote in the submitted work?**  
No.
- 2. **What is the manuscript title?**  
Phase 3 Trial of mRNA-1273 SARS-CoV-2 Vaccine: Completion of Blinded Phase
- 3. **Are you the corresponding author?**  
No.

**Certification**

I certify that the information provided in this disclosure is complete and accurate.

**Disclosure Purpose:** 21-13017

**Summary of Interests**

I do not have any interests to disclose at this time.

**Additional Questions:**

- 1. **Are there other relationships or activities that readers could perceive to have influenced, or that give the appearance of potentially influencing, what you wrote in the submitted work?**  
No.
- 2. **What is the manuscript title?**  
mrna vaccine
- 3. **Are you the corresponding author?**  
No.

**Certification**

I certify that the information provided in this disclosure is complete and accurate.

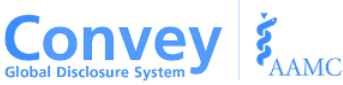

**Disclosure Purpose:** 21-13017

## Summary of Interests

| Company or Organization                                                                             |            |                                            |
|-----------------------------------------------------------------------------------------------------|------------|--------------------------------------------|
| Entity                                                                                              | Type       | Interest Held By                           |
| Moderna                                                                                             | Employment | Self                                       |
| <i>Title:</i> Sr. Director<br><i>Additional Information:</i>                                        |            | <i>Position Description:</i> Biostatistics |
| Moderna                                                                                             | Stock      | Self                                       |
| <i>Additional Information:</i> As an employee of Moderna, i am also a stock holder of Moderna stock |            |                                            |

## Additional Questions:

- Are there other relationships or activities that readers could perceive to have influenced, or that give the appearance of potentially influencing, what you wrote in the submitted work?**  
No.
- What is the manuscript title?**  
Phase 3 Trial of mRNA-1273 SARS-CoV-2 Vaccine: Completion of Blinded Phase
- Are you the corresponding author?**  
No.

## Certification

I certify that the information provided in this disclosure is complete and accurate.
